# Supplementary material for: Sulfur-directed carbon–sulfur bond cleavage for Rh-catalyzed regioselective alkynylthiolation of alkynes
Source: Royal Society of Chemistry journal article supplement (doi:10.1039/c7cc04997h), 2017-01-01

# Sulfur-directed carbon-sulfur bond cleavage for Rh-catalyzed regioselective alkynylthiolation of alkynes

Takanori Shibata,<sup>\*a,b</sup> Akihito Mitake,<sup>a</sup> Yosuke Akiyama,<sup>c</sup> and Kyalo Stephen Kanyiva<sup>c</sup>

<sup>a</sup> Department of Chemistry and Biochemistry, School of Advanced Science and Engineering, Waseda University, 3-4-1 Okubo, Shinjuku, Tokyo 169-8555, Japan

<sup>b</sup> JST, ACT-C, 4-1-8 Honcho, Kawaguchi, Saitama 332-0012, Japan

<sup>c</sup> Department of Advanced Science and Engineering, Graduate School of Advanced Science and Engineering, Waseda University, 3-4-1 Okubo, Shinjuku, Tokyo 169-8555, Japan.

<sup>d</sup> International Center for Science and Engineering Programs (ICSEP), Waseda University, 3-4-1 Okubo, Shinjuku, Tokyo 169-8555, Japan

\* E-mail: tshibata@waseda.jp

## Table of Contents

|                                                                                             |     |
|---------------------------------------------------------------------------------------------|-----|
| i) Condition screening for the intermolecular reaction of <b>1a</b> with <b>2a</b> ·····    | S2  |
| ii) Condition screening for the intramolecular reaction of <b>6a</b> ·····                  | S2  |
| iii) Experimental details and characterization data for new compounds ·····                 | S2  |
| iv) Experimental details and characterization data for complex <b>A</b> ·····               | S16 |
| v) Copies of <sup>1</sup> H NMR and <sup>13</sup> C NMR spectra for new compounds ·····     | S17 |
| vi) Copies of <sup>1</sup> H NMR and <sup>31</sup> P NMR spectra for complex <b>A</b> ····· | S55 |

### i) Condition screening for the intermolecular reaction of **1a** with **2a**

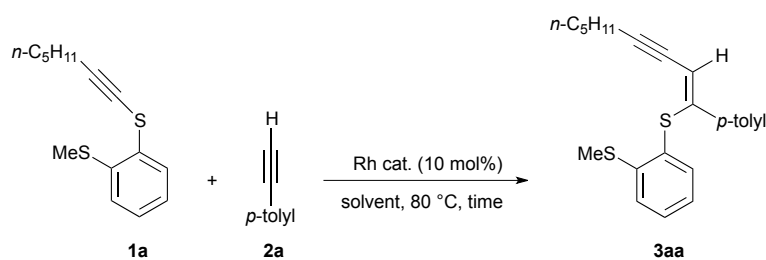

| Entry <sup>a</sup> | Rh catalyst <sup>b</sup>                                 | Solvent     | Time (h) | Yield (%) |
|--------------------|----------------------------------------------------------|-------------|----------|-----------|
| 1                  | [Rh(cod) <sub>2</sub> ]OTf + BIPHEP                      | DCE         | 1        | 19        |
| 2                  | [Ir(cod) <sub>2</sub> ]OTf + BIPHEP                      | DCE         | 1        | ND        |
| 3                  | 1/2[RhCl(cod)] <sub>2</sub> + BIPHEP                     | DCE         | 1        | ND        |
| 4                  | [Rh(cod) <sub>2</sub> ]OTf + 2PPh <sub>3</sub>           | DCE         | 1        | ND        |
| 5                  | [Rh(cod) <sub>2</sub> ]OTf + 2P(cyclohexyl) <sub>3</sub> | DCE         | 1        | ND        |
| 7                  | [Rh(cod) <sub>2</sub> ]OTf + DPPE                        | DCE         | 0.25     | 86        |
| 8                  | [Rh(cod) <sub>2</sub> ] OTf + DPPE                       | toluene     | 0.25     | 72        |
| 9                  | [Rh(cod) <sub>2</sub> ] OTf + DPPE                       | 1,4-dioxane | 0.25     | 81        |

<sup>a</sup> The ratio of sulfide **1a**/alkyne **2a** was 1/3. <sup>b</sup> BIPHEP: 2,2'-bis(diphenylphosphino)-1,1'-biphenyl, DPPE: 1,2-bis(diphenylphosphino)ethane, DPPE: 1,2-bis(diphenylphosphino)ethane.

### ii) Condition screening for the intramolecular reaction of **6a**

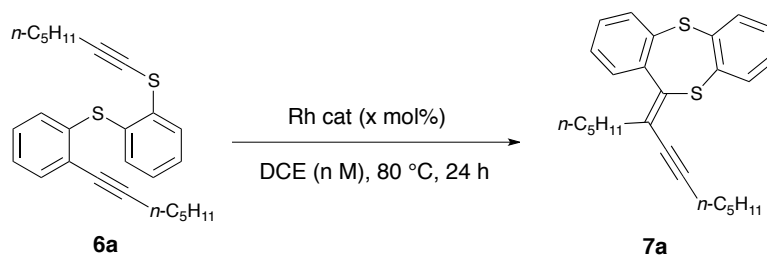

| Entry | Rh catalyst                                    | x (mol%) | n (M) <sup>a</sup> | Yield (%) |
|-------|------------------------------------------------|----------|--------------------|-----------|
| 1     | [Rh(cod)(dppe)]OTf                             | 10       | 0.10               | 22        |
| 2     | [Rh(cod) <sub>2</sub> ]OTf + <i>rac</i> -BINAP | 10       | 0.10               | 78        |
| 3     | [Rh(cod) <sub>2</sub> ]OTf + <i>rac</i> -BINAP | 10       | 0.05               | 85        |
| 4     | [Rh(cod) <sub>2</sub> ]OTf + <i>rac</i> -BINAP | 50       | 0.05               | 44        |
| 5     | [Rh(cod) <sub>2</sub> ]OTf + <i>rac</i> -BINAP | 5        | 0.10               | 93        |

<sup>a</sup> The initial concentration of diene **6a**.

### iii) Experimental details and characterization data for new compounds

**General:** <sup>1</sup>H NMR spectra were recorded on JEOL ECX-500 (500 MHz) spectrometers. The chemical shifts were reported in parts per million ( $\delta$ ) relative to internal standard TMS (0 ppm) for CDCl<sub>3</sub>. The peak patterns are indicated as follows: s, singlet; d, doublet; dd, doublet of doublet; t, triplet; dt, doublet of triplet; m, multiplet; q, quartet. The coupling constants, *J*, are reported in Hertz (Hz). <sup>13</sup>C NMR spectra were obtained by JEOL ECX-500 (125 MHz) spectrometers and referenced to the internal solvent signals (central peak is 77.16 ppm in CDCl<sub>3</sub>). CDCl<sub>3</sub> was used as a NMR solvent. High-resolution mass spectra (HRMS) were measured on an ESI (Electro Spray Ionization) – Orbitrap mass spectrometer method. X-ray structures

were obtained by a Rigaku R-AXIS RAPID diffractometer. Preparative thin-layer chromatography (PTLC) was performed with silica gel-precoated glass plates (Merck 60 GF254) prepared in our laboratory, Flash column chromatography was performed over silica gel 200-300. All reagents were weighed and handled in air and backfilled under argon at room temperature. Unless otherwise noted, all reactions were performed under an argon atmosphere. All reagents were purchased from Wako, Kanto, Aldrich and TCI and used without further purification.

### General procedure for the syntheses of substrate (GP):

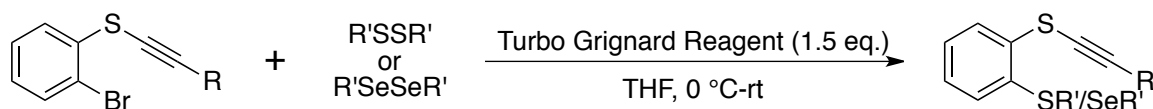

Tetrahydrofuran (3.0 ml) was added to bromide derivatives (1.0 mmol) and Turbo Grignard Reagent (1.5 eq.) in round-bottom flask at 0 °C, then stirred for 2 hours at room temperature. Disulfide (or diselenide) (2.0 eq.) was added to the reaction vessel at 0 °C, then the mixture was stirred at room temperature for 2 hours. After reaction was completed, water was added and the mixture was extracted with AcOEt. The extract was dried ( $\text{Na}_2\text{SO}_4$ ), and concentrated under reduced pressure. The crude products were purified by column chromatography on silica gel.

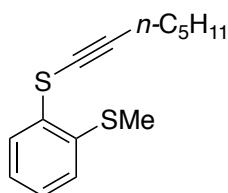

**[Hept-1-ynyl][2-(methylsulfanyl)phenyl]sulfane (1a).** GP was used. Isolated by preparative TLC (hexane only). The title compound was obtained as a yellow oil (65%).  $^1\text{H}$  NMR  $\delta$  7.68 (dd,  $J = 1.3, 7.9$  Hz, 1H), 7.32 (dd,  $J = 1.3, 7.6$  Hz, 1H), 7.26 (dt,  $J_d = 1.4$  Hz,  $J_t = 7.6$  Hz, 1H), 7.16 (dt,  $J_d = 1.4$  Hz,  $J_t = 7.9$  Hz, 1H), 2.46 (t,  $J = 7.5$  Hz, 2H), 2.44 (s, 3H), 1.66-1.57 (m, 2H), 1.46-1.32 (m, 4H), 0.92 (t,  $J = 7.4$  Hz, 3H);  $^{13}\text{C}$  NMR  $\delta$  136.4, 134.0, 130.4, 127.6, 126.6, 126.3, 101.2, 64.9, 31.2, 28.5, 22.4, 20.5, 17.9, 14.2; HRMS(ESI) calcd for  $\text{C}_{14}\text{H}_{19}\text{S}_2$  (M+H): 251.0923; found: 251.0923.

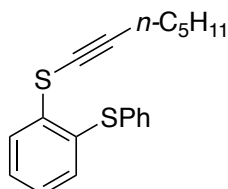

**[Hept-1-ynyl][2-(Phenylsulfanyl)phenyl]sulfane (1b).** GP was used. Isolated by preparative TLC (hexane only). The title compound was obtained as a pale yellow oil (20 %).  $^1\text{H}$  NMR  $\delta$  7.77 (dd,  $J = 1.3, 8.0$  Hz, 1H), 7.44-7.37 (m, 2H), 7.27-7.22 (m, 2H), 7.20-7.15 (m, 4H), 2.46 (t,  $J = 7.0$  Hz, 2H), 1.65-1.57 (m, 2H), 1.47-1.30 (m, 4H), 0.92 (t,  $J = 7.2$  Hz, 3H);  $^{13}\text{C}$  NMR  $\delta$  140.0, 135.7, 135.4, 129.6, 129.3, 129.1, 128.7,

126.5, 126.4, 126.2, 101.5, 64.7, 31.1, 28.3, 22.2, 20.3, 14.0; HRMS(ESI) calcd for C<sub>19</sub>H<sub>21</sub>S<sub>2</sub> (M+H): 313.1079; found: 313.1080.

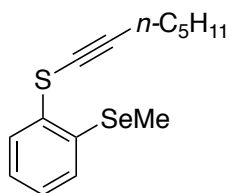

**[Hept-1-ynyl][2-(methylselenenyl)phenyl]sulfane (1c).** GP was used. Isolated by preparative TLC (hexane only). The title compound was obtained as a yellow oil (63%). <sup>1</sup>H NMR δ 7.68 (dd, *J* = 1.2, 7.7 Hz, 1H), 7.46 (dd, *J* = 1.4, 7.7 Hz, 1H), 7.29 (dt, *J*<sub>d</sub> = 1.4 Hz, *J*<sub>t</sub> = 7.5 Hz, 1H), 7.11 (dt, *J*<sub>d</sub> = 1.4 Hz, *J*<sub>t</sub> = 7.5 Hz, 1H), 2.46 (t, *J* = 7.2 Hz, 2H), 2.31 (s, 3H), 1.64-1.59 (m, 2H), 1.46-1.33 (m, 4H), 0.92 (t, *J* = 7.4 Hz, 3H); <sup>13</sup>C NMR δ 137.9, 133.1, 127.9, 127.9, 126.2, 125.9, 100.6, 65.0, 30.8, 28.0, 21.9, 20.0, 13.7, 8.4; HRMS(ESI) calcd for C<sub>14</sub>H<sub>19</sub>SSe (M+H): 299.0367; found: 299.0368.

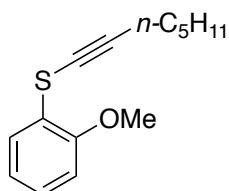

**[Hept-1-ynyl][2-methoxyphenyl]sulfane (1d).** Tetrahydrofuran (4.0 ml) was added to 1-heptyne (2.0 mmol) and *n*-BuLi (0.9 eq.) in round-bottom flask at -78 °C, then stirred for 1 hour. Bis(2-methoxyphenyl) disulfide (0.7 eq.) in tetrahydrofuran (3 ml) was added to the reaction, then the mixture was stirred and warmed to room temperature. After reaction was completed, water was added and the mixture was extracted with diethyl ether. The extract was dried (Na<sub>2</sub>SO<sub>4</sub>), and concentrated under reduced pressure. The crude products were purified by column chromatography on silica gel (hexane/CH<sub>2</sub>Cl<sub>2</sub> = 3/1) to give title compound (47%) as a colorless oil. <sup>1</sup>H NMR δ 7.60 (dd, *J* = 1.6, 7.8 Hz, 1H), 7.19-7.15 (m, 1H), 7.01 (dt, *J*<sub>d</sub> = 1.2 Hz, *J*<sub>t</sub> = 7.7 Hz, 1H), 6.82 (dd, *J* = 1.1, 8.1 Hz, 1H), 3.87 (s, 3H), 2.46 (t, *J* = 7.0 Hz, 2H), 1.66-1.58 (m, 2H), 1.47-1.32 (m, 4H), 0.92 (t, *J* = 7.2 Hz, 3H); <sup>13</sup>C NMR δ 155.0, 126.8, 126.2, 122.5, 121.5, 110.2, 100.5, 64.2, 55.8, 31.1, 28.4, 22.2, 20.3, 13.9; HRMS(ESI) calcd for C<sub>14</sub>H<sub>19</sub>OS (M+H): 235.1151; found: 235.1152.

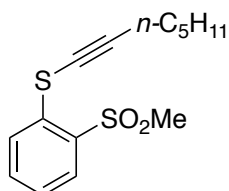

**[Hept-1-ynyl][2-(methylsulfonyl)phenyl]sulfane (1e).** Tetrahydrofuran (2.0 ml) was added to (2-bromophenyl)(hept-1-ynyl)sulfane (1.0 mmol) and Turbo Grignard Reagent (1.5 eq.) in round-bottom flask at 0 °C, then stirred for 2 hour at room temperature. Methanesulfonyl chloride (2.2 eq.) was added to the reaction, then the mixture was stirred and warmed to room temperature. After reaction was completed, saturated aq. NaHCO<sub>3</sub> was added and the mixture was extracted with diethyl ether. The extract was dried (Na<sub>2</sub>SO<sub>4</sub>), and concentrated under reduced pressure. The crude products were purified by column

chromatography on silica gel (hexane/EtOAc = 5/1) to give title compound (17%) as a colorless oil.  $^1\text{H}$  NMR  $\delta$  8.03-7.99 (m, 2H), 7.63 (dt,  $J_d = 1.3$  Hz,  $J_t = 7.4$  Hz, 1H), 7.41-7.36 (m, 1H), 3.17 (s, 3H), 2.49 (t,  $J = 7.1$  Hz, 2H), 1.67-1.62 (m, 2H), 1.48-1.33 (m, 4H), 0.93 (t,  $J = 7.3$  Hz, 3H);  $^{13}\text{C}$  NMR  $\delta$  136.2, 136.0, 134.0, 129.9, 128.4, 126.4, 102.3, 63.7, 42.1, 31.1, 28.1, 22.1, 20.3, 14.0; HRMS(ESI) calcd for  $\text{C}_{14}\text{H}_{18}\text{O}_2\text{NaS}_2$  (M+Na): 305.0640; found: 305.0640.

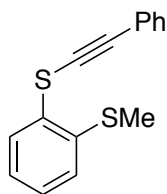

**[2-(Methylsulfonyl)phenyl][phenylethynyl]sulfane (1f)**. GP was used. Isolated by preparative TLC (hexane only). The title compound was obtained as a pale yellow oil (78%).  $^1\text{H}$  NMR  $\delta$  7.75 (dd,  $J = 1.1$ , 7.9 Hz, 1H), 7.53-7.50 (m, 2H), 7.36-7.33 (m, 4H), 7.27 (dt,  $J_d = 1.4$  Hz,  $J_t = 7.5$  Hz, 1H), 7.19 (dt,  $J_d = 1.4$  Hz,  $J_t = 7.5$  Hz, 1H), 2.46 (s, 3H);  $^{13}\text{C}$  NMR  $\delta$  135.6, 134.5, 131.9, 130.7, 128.8, 128.5, 127.8, 127.1, 126.8, 123.0, 98.8, 75.8, 18.0; HRMS(ESI) calcd for  $\text{C}_{15}\text{H}_{13}\text{S}_2$  (M+H): 257.0453; found: 257.0454.

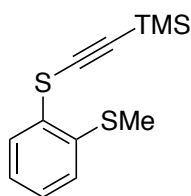

**[2-(Methylsulfonyl)phenyl][trimethylsilylethynyl]sulfane (1g)**. GP was used. Isolated by preparative TLC (hexane only). The title compound was obtained as a pale yellow oil (73%).  $^1\text{H}$  NMR  $\delta$  7.68 (dd,  $J = 1.3$ , 7.8 Hz, 1H), 7.37-7.34 (m, 1H), 7.32-7.27 (m, 1H), 7.23-7.18 (m, 1H), 2.45 (s, 3H), 0.27 (s, 9H);  $^{13}\text{C}$  NMR  $\delta$  135.1, 134.3, 130.8, 127.9, 127.0, 126.4, 107.3, 90.5, 18.0, 0.0; HRMS(ESI) calcd for  $\text{C}_{12}\text{H}_{17}\text{S}_2\text{Si}$  (M+H): 253.0535; found: 253.0536.

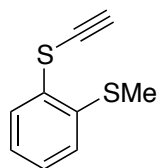

**[Ethynyl][2-(methylsulfonyl)phenyl]sulfane (1h)**. Substrate (**1g**, 252.5 mg, 1.0 mmol) was dissolved in methanol (4.0 ml) and tetrahydrofuran (2.0 ml). After addition of KOH (62.1 mg, 1.1 mmol) and water (1.4 ml), the mixture was stirred at room temperature. After 2 h, the solvents were removed, and the residue was purified by preparative TLC (hexane/toluene = 5/1) to give corresponding substrate (**1h**, 94%) as a yellow oil.  $^1\text{H}$  NMR  $\delta$  7.71 (dd,  $J = 1.0$ , 7.7 Hz, 1H), 7.36-7.32 (m, 1H), 7.28-7.24 (m, 1H), 7.20 (dt,  $J_d = 1.2$  Hz,  $J_t = 7.5$  Hz, 1H), 3.28 (s, 1H), 2.44 (s, 3H);  $^{13}\text{C}$  NMR  $\delta$  134.9, 133.9, 130.4, 127.6, 127.3, 127.0, 87.7, 71.2, 17.8; HRMS(ESI) calcd for  $\text{C}_9\text{H}_9\text{S}_2$  (M+H): 181.0140; found: 181.0140.

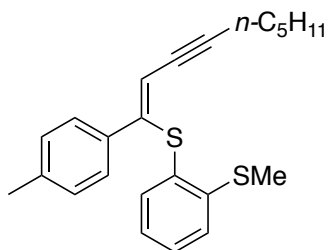

**(Z)-[2-(Methylsulfanyl)phenyl][1-(4-methylphenyl)non-1-en-3-ynyl]sulfane (3aa).** Isolated by preparative TLC (hexane/CH<sub>2</sub>Cl<sub>2</sub> = 5/1). The title compound was obtained as a yellow oil (98%). <sup>1</sup>H NMR δ 7.37 (d, *J* = 7.9 Hz, 2H), 7.10-7.03 (m, 3H), 7.00 (d, *J* = 7.9 Hz, 2H), 6.87 (dt, *J*<sub>d</sub> = 1.4 Hz, *J*<sub>t</sub> = 7.4 Hz, 1H), 6.22 (t, *J* = 2.2 Hz, 1H), 2.47 (s, 3H), 2.37 (dt, *J*<sub>d</sub> = 2.2 Hz, *J*<sub>t</sub> = 7.1 Hz, 2H), 2.25 (s, 3H), 1.57-1.51 (m, 2H), 1.41-1.29 (m, 4H), 0.88 (t, *J* = 7.3 Hz, 3H); <sup>13</sup>C NMR δ 144.8, 139.3, 138.3, 135.6, 133.6, 131.4, 128.8, 127.5, 126.9, 125.9, 125.1, 113.0, 100.1, 78.5, 31.1, 28.3, 22.2, 21.1, 20.0, 16.2, 14.0; HRMS(ESI) calcd for C<sub>23</sub>H<sub>26</sub>NaS<sub>2</sub> (M+Na): 389.1368; found: 389.1368.

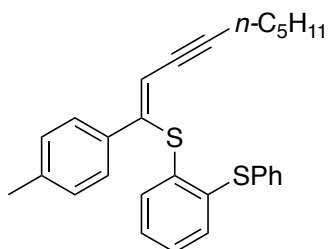

**(Z)-[2-(Phenylsulfanyl)phenyl][1-(4-methylphenyl)non-1-en-3-ynyl]sulfane (3ba).** Purified by preparative TLC (hexane/CH<sub>2</sub>Cl<sub>2</sub> = 5/1). The title compound and dimer of **1b** were obtained as a mixture, and the yield was determined to be 67% by the NMR analysis using tetrachloroethylene as an internal standard. Only the discriminable <sup>1</sup>H NMR and <sup>13</sup>C NMR peaks for compound **3ba** were listed. <sup>1</sup>H NMR δ 6.19 (t, *J* = 2.0 Hz, 1H), 2.36 (dt, *J*<sub>d</sub> = 2.0 Hz, *J*<sub>t</sub> = 7.0 Hz, 2H), 2.25 (s, 3H), 1.56-1.46 (m, 2H), 1.41-1.26 (m, 4H), 0.87 (t, *J* = 7.5 Hz, 3H); <sup>13</sup>C NMR δ 100.4, 78.8, 31.3, 28.5, 22.4, 21.3, 20.2, 14.2; HRMS(ESI) calcd for C<sub>28</sub>H<sub>28</sub>NaS<sub>2</sub> (M+Na): 451.1525; found: 451.1526.

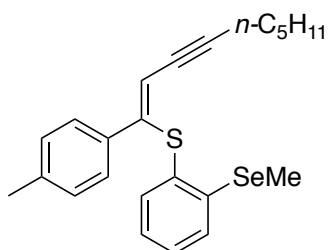

**(Z)-[2-(Methylselenenyl)phenyl][1-(4-methylphenyl)non-1-en-3-ynyl]sulfane (3ca).** Isolated by preparative TLC (hexane/CH<sub>2</sub>Cl<sub>2</sub> = 4/1). The title compound was obtained as a yellow oil (89%). <sup>1</sup>H NMR δ 7.37 (d, *J* = 8.1 Hz, 2H), 7.18 (dd, *J* = 1.2, 7.8 Hz, 1H), 7.06 (dd, *J* = 1.4, 7.8 Hz, 1H), 7.01-6.98 (m, 3H), 6.90 (dt, *J*<sub>d</sub> = 1.4 Hz, *J*<sub>t</sub> = 7.6 Hz, 1H), 6.12 (t, *J* = 2.2 Hz, 1H), 2.38 (dt, *J*<sub>d</sub> = 2.2 Hz, *J*<sub>t</sub> = 7.0 Hz, 2H), 2.32 (s, 3H), 2.25 (s, 3H), 1.58-1.52 (m, 2H), 1.42-1.29 (m, 4H), 0.89 (t, *J* = 7.2 Hz, 3H); <sup>13</sup>C NMR δ 145.1, 138.3, 135.5, 135.3, 134.9, 131.7, 128.8, 128.6, 127.5, 127.1, 125.8, 112.9, 100.2, 78.5, 31.1, 28.4, 22.2, 21.1, 20.0, 14.0, 7.1; HRMS(ESI) calcd for C<sub>23</sub>H<sub>26</sub>NaSSe (M+Na): 437.0810; found: 437.0811.

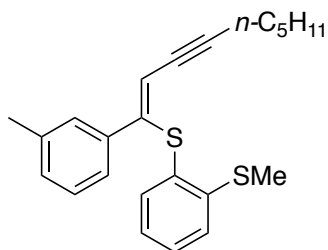

**(Z)-[2-(Methylsulfanyl)phenyl][1-(3-methylphenyl)non-1-en-3-ynyl]sulfane (3ab).** Isolated by preparative TLC (hexane/CH<sub>2</sub>Cl<sub>2</sub> = 5/1). The title compound was obtained as a yellow oil (89%). <sup>1</sup>H NMR δ 7.30-7.26 (m, 2H), 7.09-7.03 (m, 4H), 6.98 (d, *J* = 7.4 Hz, 1H), 6.89-6.86 (m, 1H), 6.15-6.14 (m, 1H), 2.47 (s, 3H), 2.37 (dt, *J*<sub>d</sub> = 2.2 Hz, *J*<sub>t</sub> = 7.1 Hz, 2H), 2.24 (s, 3H), 1.57-1.51 (m, 2H), 1.42-1.29 (m, 4H), 0.89 (t, *J* = 7.5 Hz, 3H); <sup>13</sup>C NMR δ 145.2, 139.6, 138.4, 137.6, 133.4, 131.7, 129.1, 128.3, 127.9, 127.0, 125.9, 125.0, 124.8, 113.3, 100.3, 78.4, 31.1, 28.3, 22.2, 21.3, 20.0, 16.2, 14.0; HRMS(ESI) calcd for C<sub>23</sub>H<sub>26</sub>NaS<sub>2</sub> (M+Na): 389.1368; found: 389.1368.

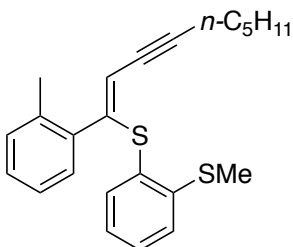

**(Z)-[2-(Methylsulfanyl)phenyl][1-(2-methylphenyl)non-1-en-3-ynyl]sulfane (3ac).** Isolated by preparative TLC (hexane/CH<sub>2</sub>Cl<sub>2</sub> = 5/1). The title compound was obtained as a red brown oil (96%). <sup>1</sup>H NMR δ 7.18-7.14 (m, 2H), 7.10 (dt, *J*<sub>d</sub> = 1.4 Hz, *J*<sub>t</sub> = 7.5 Hz, 1H), 7.03-6.98 (m, 3H), 6.95-6.91 (m, 1H), 6.83 (dt, *J*<sub>d</sub> = 1.3 Hz, *J*<sub>t</sub> = 7.4 Hz, 1H), 5.72-5.71 (m, 1H), 2.46 (dt, *J*<sub>d</sub> = 2.2 Hz, *J*<sub>t</sub> = 7.1 Hz, 2H), 2.43 (s, 3H), 2.40 (s, 3H), 1.66-1.60 (m, 2H), 1.51-1.45 (m, 2H), 1.40-1.36 (m, 2H), 0.95 (t, *J* = 7.4 Hz, 3H); <sup>13</sup>C NMR δ 146.6, 143.4, 137.9, 136.2, 135.1, 129.9, 129.8, 129.8, 128.5, 127.8, 124.8, 124.3, 124.1, 110.9, 99.7, 77.4, 31.1, 28.5, 22.3, 20.0, 20.0, 15.7, 14.1; HRMS(ESI) calcd for C<sub>23</sub>H<sub>26</sub>NaS<sub>2</sub> (M+Na): 389.1368; found: 389.1368.

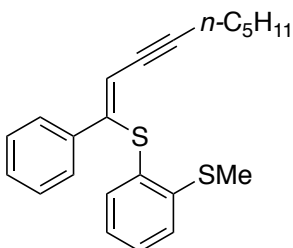

**(Z)-[2-(Methylsulfanyl)phenyl][1-(phenyl)non-1-en-3-ynyl]sulfane (3ad).** Isolated by preparative TLC (hexane/CH<sub>2</sub>Cl<sub>2</sub> = 5/1). The title compound was obtained as a yellow oil (96%). <sup>1</sup>H NMR δ 7.48-7.44 (m, 2H), 7.20-7.14 (m, 3H), 7.08-7.00 (m, 3H), 6.87-6.82 (m, 1H), 6.14 (t, *J* = 1.8 Hz, 1H), 2.45 (s, 3H), 2.38 (dt, *J*<sub>d</sub> = 1.8 Hz, *J*<sub>t</sub> = 6.8 Hz, 2H), 1.58-1.50 (m, 2H), 1.43-1.27 (m, 4H), 0.88 (t, *J* = 7.2 Hz, 3H); <sup>13</sup>C NMR δ 145.3, 139.9, 138.6, 133.2, 132.0, 128.5, 128.2, 127.8, 127.3, 125.9, 125.1, 113.6, 100.6, 78.6, 31.3, 28.5, 22.4, 20.2, 16.3, 14.2; HRMS(ESI) calcd for C<sub>22</sub>H<sub>24</sub>NaS<sub>2</sub> (M+Na): 375.1212; found: 375.1212.

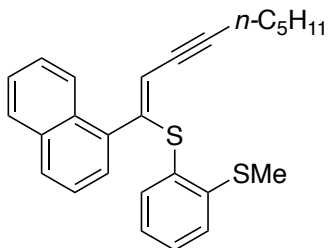

**(Z)-[2-(Methylsulfanyl)phenyl][1-(1-naphthyl)non-1-en-3-ynyl]sulfane (3ae).** Isolated by preparative TLC (hexane/CH<sub>2</sub>Cl<sub>2</sub> = 5/1). The title compound was obtained as a yellow oil (83%). <sup>1</sup>H NMR δ 8.34-8.33 (m, 1H), 7.68-7.66 (m, 1H), 7.57-7.56 (m, 1H), 7.48-7.44 (m, 1H), 7.41-7.37 (m, 1H), 7.35 (dd, *J* = 1.1, 7.1 Hz, 1H), 7.18-7.15 (m, 1H), 6.97 (dd, *J* = 1.3, 7.7 Hz, 1H), 6.91 (dt, *J*<sub>d</sub> = 1.4 Hz, *J*<sub>t</sub> = 7.9 Hz, 1H), 6.84 (dd, *J* = 1.3, 7.9 Hz, 1H), 6.52 (dt, *J*<sub>d</sub> = 1.4 Hz, *J*<sub>t</sub> = 7.5 Hz, 1H), 5.88 (t, *J* = 2.2 Hz, 1H), 2.48 (dt, *J*<sub>d</sub> = 2.2 Hz, *J*<sub>t</sub> = 7.1 Hz, 2H), 2.34 (s, 3H), 1.67-1.62 (m, 2H), 1.52-1.46 (m, 2H), 1.41-1.34 (m, 2H), 0.93 (t, *J* = 7.2 Hz, 3H); <sup>13</sup>C NMR δ 145.9, 143.7, 135.9, 135.5, 133.1, 131.5, 129.5, 128.6, 128.2, 127.9, 127.1, 125.9, 125.8, 125.6, 124.5, 124.2, 123.8, 111.2, 100.1, 77.5, 31.1, 28.5, 22.3, 20.0, 15.7, 14.0; HRMS(ESI) calcd for C<sub>26</sub>H<sub>26</sub>NaS<sub>2</sub> (M+Na): 425.1368; found: 425.1368.

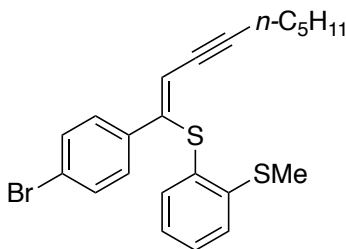

**(Z)-[2-(Methylsulfanyl)phenyl][1-(4-bromophenyl)non-1-en-3-ynyl]sulfane (3af).** Isolated by preparative TLC (hexane/CH<sub>2</sub>Cl<sub>2</sub> = 5/1). The title compound was obtained as a yellow oil (87%). <sup>1</sup>H NMR δ 7.33-7.28 (m, 4H), 7.09-7.03 (m, 3H), 6.89-6.85 (m, 1H), 6.10 (t, *J* = 2.2 Hz, 1H), 2.45-2.44 (m, 3H), 2.39 (dt, *J*<sub>d</sub> = 2.2 Hz, *J*<sub>t</sub> = 7.2 Hz, 2H), 1.59-1.52 (m, 2H), 1.43-1.27 (m, 4H), 0.89 (t, *J* = 7.2 Hz, 3H); <sup>13</sup>C NMR δ 144.2, 140.1, 137.4, 132.2, 132.0, 131.2, 129.2, 127.5, 125.5, 125.0, 122.3, 113.8, 101.0, 78.3, 31.1, 28.3, 22.2, 20.0, 16.0, 14.0; HRMS(ESI) calcd for C<sub>22</sub>H<sub>23</sub>BrNaS<sub>2</sub> (M+Na): 453.0317; found: 453.0318.

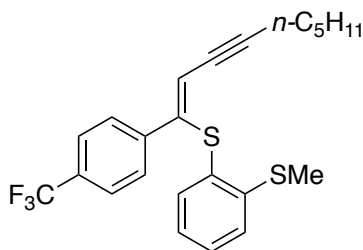

**(Z)-[2-(Methylsulfanyl)phenyl][1-(4-trifluoromethylphenyl)non-1-en-3-ynyl]sulfane (3ag).** Isolated by preparative TLC (hexane/CH<sub>2</sub>Cl<sub>2</sub> = 5/1). The title compound was obtained as a yellow oil (81%). <sup>1</sup>H NMR δ 7.56 (d, *J* = 7.9 Hz, 2H), 7.43 (d, *J* = 7.9 Hz, 2H), 7.09-7.07 (m, 3H), 6.89-6.86 (m, 1H), 6.17 (t, *J* = 2.3 Hz, 1H), 2.47 (s, 3H), 2.41 (dt, *J*<sub>d</sub> = 2.3 Hz, *J*<sub>t</sub> = 7.2 Hz, 2H), 1.60-1.54 (m, 2H), 1.44-1.29 (m, 4H), 0.90 (t, *J* = 7.2 Hz, 3H); <sup>13</sup>C NMR δ 143.9, 142.0 (d, *J*<sub>C-F</sub> = 1.5 Hz), 140.3, 132.1, 131.9, 130.0 (q, *J*<sub>C-F</sub> = 32.8 Hz), 127.9, 127.6, 125.6, 125.0 (q, *J*<sub>C-F</sub> = 3.9 Hz), 123.9 (d, *J*<sub>C-F</sub> = 276.9 Hz), 115.0, 101.8, 78.1, 31.1, 28.2, 22.2, 20.0, 16.0, 13.9 (a pair of peaks at the aromatic region is overlapped); HRMS(ESI) calcd for C<sub>23</sub>H<sub>23</sub>F<sub>3</sub>NaS<sub>2</sub> (M+Na): 443.1088; found: 443.1089.



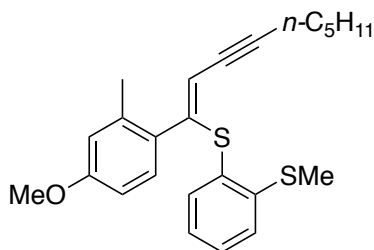

**(Z)-[2-(Methylsulfanyl)phenyl][1-(2-methyl-4-methoxyphenyl)non-1-en-3-ynyl]sulfane (3ah).** Isolated by preparative TLC (hexane/CH<sub>2</sub>Cl<sub>2</sub> = 5/1). The title compound was obtained as a pale yellow oil (95%). <sup>1</sup>H NMR δ 7.14-7.12 (m, 1H), 7.08-7.05 (m, 2H), 6.97-6.95 (m, 1H), 6.83-6.79 (m, 1H), 6.52-6.51 (m, 1H), 6.46 (dd, *J* = 2.4, 8.3 Hz, 1H), 5.66 (t, *J* = 2.1 Hz, 1H), 3.67 (s, 3H), 2.42 (dt, *J<sub>d</sub>* = 2.1 Hz, *J<sub>t</sub>* = 7.1 Hz, 2H), 2.39 (s, 3H), 2.35 (s, 3H), 1.62-1.55 (m, 2H), 1.47-1.29 (m, 4H), 0.91 (t, *J* = 7.3 Hz, 3H); <sup>13</sup>C NMR δ 159.1, 146.5, 143.2, 138.0, 135.0, 131.2, 130.7, 130.5, 128.5, 124.5, 124.3, 115.3, 111.1, 110.4, 99.7, 77.7, 55.2, 31.3, 28.6, 22.4, 20.5, 20.1, 15.9, 14.2; HRMS(ESI) calcd for C<sub>24</sub>H<sub>28</sub>ONaS<sub>2</sub> (M+Na): 419.1474; found: 419.1472.

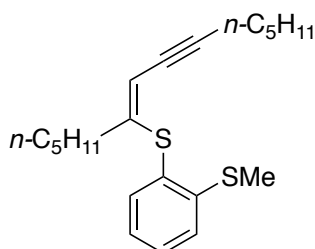

**(Z)-[2-(Methylsulfanyl)phenyl][1-(pentyl)non-1-en-3-ynyl]sulfane (3ai).** Isolated by preparative TLC (hexane/CH<sub>2</sub>Cl<sub>2</sub> = 5/1). The title compound was obtained as a yellow oil (81%). <sup>1</sup>H NMR δ 7.42 (dd, *J* = 1.1, 7.7 Hz, 1H), 7.30-7.29 (m, 1H), 7.15-7.13 (m, 1H), 7.09-7.05 (m, 1H), 5.66-5.64 (m, 1H), 2.44 (s, 3H), 2.36 (dt, *J<sub>d</sub>* = 2.0 Hz, *J<sub>t</sub>* = 6.9 Hz, 2H), 2.02 (t, *J* = 7.1 Hz, 2H), 1.58-1.51 (m, 2H), 1.43-1.28 (m, 6H), 1.21-1.07 (m, 4H), 0.89 (t, *J* = 7.1 Hz, 3H), 0.80 (t, *J* = 6.9 Hz, 3H); <sup>13</sup>C NMR δ 147.5, 143.4, 134.6, 129.7, 129.6, 128.4, 124.2, 107.6, 97.4, 77.1, 35.2, 30.8, 30.7, 28.2, 27.8, 22.0, 21.9, 19.5, 15.3, 13.7, 13.6; HRMS(ESI) calcd for C<sub>21</sub>H<sub>30</sub>NaS<sub>2</sub> (M+Na): 369.1681; found: 369.1681.

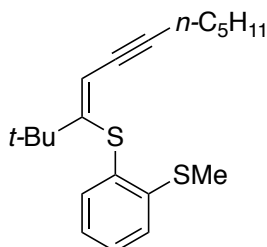

**(Z)-[2-(Methylsulfanyl)phenyl][1-(2-methyl-2-propanyl)non-1-en-3-ynyl]sulfane (3aj).** Isolated by preparative TLC (hexane/CH<sub>2</sub>Cl<sub>2</sub> = 5/1). The title compound was obtained as a yellow oil (86%). <sup>1</sup>H NMR δ 7.20-7.16 (m, 2H), 7.11-7.03 (m, 2H), 6.12 (t, *J* = 2.3 Hz, 1H), 2.49 (s, 3H), 2.04 (dt, *J<sub>d</sub>* = 2.3 Hz, *J<sub>t</sub>* = 7.0 Hz, 2H), 1.23 (s, 9H), 1.22-1.09 (m, 6H), 0.81 (t, *J* = 6.9 Hz, 3H); <sup>13</sup>C NMR δ 154.6, 136.7, 136.4, 127.7, 126.9, 125.6, 125.6, 114.5, 99.2, 78.1, 39.4, 30.9, 29.2, 28.0, 22.2, 19.6, 16.4, 13.9; HRMS(ESI) calcd for C<sub>20</sub>H<sub>28</sub>NaS<sub>2</sub> (M+Na): 355.1525; found: 355.1525.

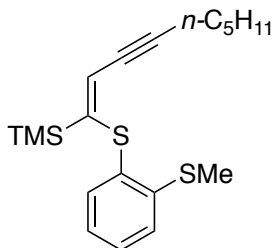

**(Z)-[2-(Methylsulfanyl)phenyl][1-(trimethylsilyl)non-1-en-3-ynyl]sulfane (3ak).** Isolated by preparative TLC (hexane/CH<sub>2</sub>Cl<sub>2</sub> = 5/1). The title compound was obtained as a yellow oil (76%). <sup>1</sup>H NMR δ 7.31 (dd, *J* = 1.4, 7.5 Hz, 1H), 7.21-7.18 (m, 1H), 7.14 (dd, *J* = 1.3, 7.6 Hz, 1H), 7.04 (dt, *J*<sub>d</sub> = 1.4 Hz, *J*<sub>t</sub> = 7.5 Hz, 1H), 6.22 (t, *J* = 2.3 Hz, 1H), 2.46 (s, 3H), 2.23 (dt, *J*<sub>d</sub> = 2.3 Hz, *J*<sub>t</sub> = 7.2 Hz, 2H), 1.45-1.38 (m, 2H), 1.32-1.24 (m, 4H), 0.86 (t, *J* = 7.1 Hz, 3H), 0.04 (s, 9H); <sup>13</sup>C NMR δ 148.6, 142.2, 134.4, 133.7, 128.6, 126.2, 125.6, 123.9, 102.2, 79.1, 32.1, 29.2, 23.2, 20.8, 16.9, 15.0, 0.0; HRMS(ESI) calcd for C<sub>19</sub>H<sub>28</sub>NaS<sub>2</sub>Si (M+Na): 371.1294; found: 371.1295.

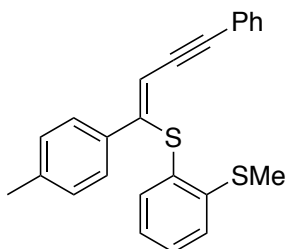

**(Z)-[1-(4-Methylphenyl)-4-(phenyl)but-1-en-3-ynyl][2-(methylsulfanyl)phenyl]sulfane (3fa).** Isolated by preparative TLC (hexane/CH<sub>2</sub>Cl<sub>2</sub> = 4/1). The title compound was obtained as a pale yellow solid (91%). Mp 103 °C; <sup>1</sup>H NMR δ 7.45-7.42 (m, 4H), 7.30-7.28 (m, 3H), 7.13-7.02 (m, 5H), 6.90-6.86 (m, 1H), 6.32 (s, 1H), 2.47 (s, 3H), 2.26 (s, 3H); <sup>13</sup>C NMR δ 147.1, 139.8, 138.7, 135.5, 133.1, 131.9, 131.6, 128.9, 128.2, 127.6, 127.3, 125.8, 125.1, 123.5, 111.6, 98.1, 87.6, 21.2, 16.1 (a pair of peaks at the aromatic region is overlapped); HRMS(ESI) calcd for C<sub>24</sub>H<sub>20</sub>NaS<sub>2</sub> (M+Na): 395.0899; found: 395.0900.

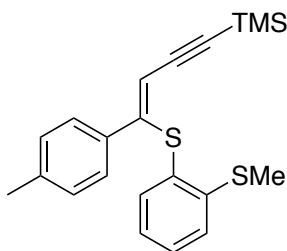

**(Z)-[1-(4-Methylphenyl)-4-(trimethylsilyl)but-1-en-3-ynyl][2-(methylsulfanyl)phenyl]sulfane (3ga).** Isolated by preparative TLC (hexane/CH<sub>2</sub>Cl<sub>2</sub> = 4/1). The title compound was obtained as a yellow oil (90%). <sup>1</sup>H NMR δ 7.35 (d, *J* = 8.1 Hz, 2H), 7.09-7.06 (m, 3H), 7.00 (d, *J* = 8.1 Hz, 2H), 6.89-6.85 (m, 1H), 6.09 (s, 1H), 2.47 (s, 3H), 2.25 (s, 3H), 0.19 (s, 9H); <sup>13</sup>C NMR δ 148.6, 140.0, 138.8, 135.5, 133.1, 132.3, 129.0, 127.8, 127.4, 125.9, 125.1, 111.2, 104.1, 102.4, 21.3, 16.3, 0.0; HRMS(ESI) calcd for C<sub>21</sub>H<sub>24</sub>NaS<sub>2</sub>Si (M+Na): 391.0981; found: 391.0982.

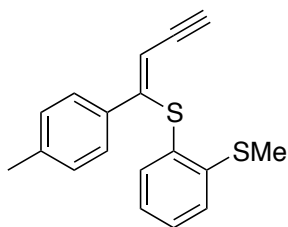

**(Z)-[1-(4-Methylphenyl)but-1-en-3-ynyl][2-(methylsulfanyl)phenyl]sulfane (3ha).** Isolated by preparative TLC (hexane/CH<sub>2</sub>Cl<sub>2</sub> = 3/1). The title compound was obtained as a yellow oil (12%). <sup>1</sup>H NMR δ 7.35 (d, *J* = 8.1 Hz, 2H), 7.11-7.06 (m, 3H), 7.00 (d, *J* = 8.1 Hz, 2H), 6.91-6.85 (m, 1H), 6.05 (d, *J* = 2.2 Hz, 1H), 3.45 (dt, *J* = 2.2 Hz, 1H), 2.47 (s, 3H), 2.25 (s, 3H); <sup>13</sup>C NMR δ 149.5, 140.4, 138.9, 134.9, 132.5, 132.1, 128.9, 127.7, 127.6, 125.6, 124.9, 110.1, 85.5, 81.1, 21.2, 16.1; HRMS(ESI) calcd for C<sub>18</sub>H<sub>16</sub>NaS<sub>2</sub> (M+Na): 319.0586; found: 319.0587.

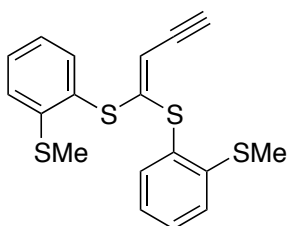

**[1-((2-Methylsulfanylphenyl)sulfanyl)but-1-en-3-ynyl][2-(methylsulfanyl)phenyl]sulfane (3hh).** Isolated by preparative TLC (hexane/CH<sub>2</sub>Cl<sub>2</sub> = 3/1). The title compound was obtained as a yellow oil (64%). <sup>1</sup>H NMR δ 7.43 (dd, *J* = 1.3, 7.7 Hz, 1H), 7.36-28 (m, 3H), 7.20 (dd, *J* = 1.0, 7.7 Hz, 1H), 7.14 (dd, *J* = 1.2, 7.9 Hz, 1H), 7.12-7.06 (m, 2H), 5.48 (d, *J* = 2.5 Hz, 1H), 3.42 (d, *J* = 2.5 Hz, 1H), 2.45 (s, 3H), 2.35 (s, 3H); <sup>13</sup>C NMR δ 146.5, 144.2, 143.4, 135.6, 134.6, 130.0, 129.6, 129.2, 128.9, 125.6, 125.3, 125.2, 124.9, 107.9, 85.5, 80.1, 16.1, 15.6; HRMS(ESI) calcd for C<sub>18</sub>H<sub>16</sub>NaS<sub>4</sub> (M+Na): 383.0027; found: 383.0027.

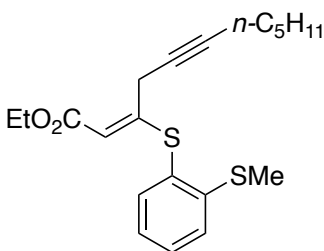

**Ethyl (E)-3-((2-(methylsulfanyl)phenyl)sulfanyl)undec-2-en-5-ynoate (5).** Isolated by preparative TLC (hexane/EtOAc = 5/1). The title compound was obtained as a yellow oil (54%). <sup>1</sup>H NMR δ 7.51 (dd, *J* = 1.4, 7.5 Hz, 1H), 7.43 (dt, *J*<sub>d</sub> = 1.6 Hz, *J*<sub>t</sub> = 7.8 Hz, 1H), 7.24-7.21 (m, 1H), 7.17 (dt, *J*<sub>d</sub> = 1.2 Hz, *J*<sub>t</sub> = 7.5 Hz, 1H), 5.08-5.07 (m, 1H), 4.07 (q, *J* = 7.2 Hz, 2H), 3.95-3.93 (m, 2H), 2.44 (s, 3H), 2.23-2.18 (m, 2H), 1.57-1.50 (m, 2H), 1.44-1.30 (m, 4H), 1.20 (t, *J* = 7.2 Hz, 3H), 0.90 (t, *J* = 7.3 Hz, 3H); <sup>13</sup>C NMR δ 165.0, 158.0, 146.1, 137.6, 131.1, 126.5, 125.3, 124.9, 110.6, 83.5, 75.1, 60.0, 31.2, 28.6, 23.4, 22.4, 19.0, 15.4, 14.4, 14.2; HRMS(ESI) calcd for C<sub>20</sub>H<sub>26</sub>O<sub>2</sub>NaS<sub>2</sub> (M+Na): 385.1266; found: 385.1267.

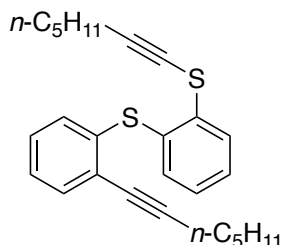

**[Hept-1-ynyl]bis[2-(hept-1-ynyl)phenyl]sulfane (6a).** Tetrahydrofuran solution (2.5 ml) of [Hept-1-ynyl]bis[2-(2-bromophenyl)sulfanyl]phenyl)sulfane (1.48 g, 3.8 mmol) was added to a dry and argon-flushed flask, then cooled to  $-20\text{ }^{\circ}\text{C}$ .  $i\text{PrMgCl} \cdot \text{LiCl}$  (tetrahydrofuran solution (abt. 14%), 4.7 ml, 4.9 mmol) was added at  $-20\text{ }^{\circ}\text{C}$  and the resulting mixture was stirred for 2 h warming to rt. Then, a solution of  $\text{I}_2$  (2.45 g, 9.6 mmol) in THF (9.0 ml) was added and stirred for 15 min. The reaction mixture was quenched with sat.  $\text{Na}_2\text{S}_2\text{O}_3$  and the resulting mixture was extracted with diethyl ether. The combined organic layer was dried ( $\text{Na}_2\text{SO}_4$ ), and concentrated under reduced pressure. Tetrahydrofuran 1.9 mL) and diisopropylamine (0.7 mL) were added to a part of crude mixture (303.0 mg, 0.6 mmol),  $\text{Pd}(\text{PPh}_3)_2\text{Cl}_2$  (56.4 mg, 0.08 mmol) and  $\text{CuI}$  (30.8 mg, 0.16 mmol) under an Ar atmosphere. 1-heptyne (0.25 ml, 1.8 mmol) was added, and the resulting mixture was stirred at  $60\text{ }^{\circ}\text{C}$ . After 4 h, the solvents were removed, and the residue was purified by column chromatography on silica gel (hexane/ $\text{CH}_2\text{Cl}_2 = 5/1$ ) to give diyne (106.6 mg, 44%) as a yellow oil.  $^1\text{H NMR}$   $\delta$  7.84-7.78 (m, 1H), 7.48-7.41 (m, 2H), 7.40-7.35 (m, 1H), 7.24-7.18 (m, 1H), 7.09-7.04 (m, 2H), 6.67-6.62 (m, 1H), 2.52-2.44 (m, 4H), 1.67-1.59 (m, 4H), 1.51-1.28 (m, 8H), 0.92 (t,  $J = 7.2\text{ Hz}$ , 6H);  $^{13}\text{C NMR}$   $\delta$  141.1, 138.8, 136.3, 132.4, 130.0, 128.0, 128.0, 126.5, 126.1, 126.1, 125.3, 122.6, 101.6, 97.7, 78.0, 64.8, 31.1, 31.1, 28.3, 22.2, 22.2, 20.3, 19.7, 14.0, 14.0 (a pair of peaks at the aliphatic region is overlapped); HRMS(ESI) calcd for  $\text{C}_{26}\text{H}_{30}\text{NaS}_2$  ( $\text{M}+\text{Na}$ ): 429.1681; found: 429.1682.

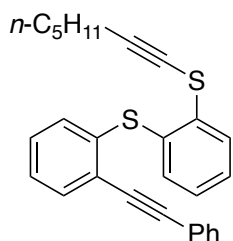

**[Hept-1-ynyl]bis[2-(phenylethynyl)phenyl]sulfane (6b).** Isolated by preparative TLC (hexane/ $\text{CH}_2\text{Cl}_2 = 5/1$ ). The title compound was obtained as a pale yellow oil (39%).  $^1\text{H NMR}$   $\delta$  7.82 (dd,  $J = 1.1, 8.0\text{ Hz}$ , 1H), 7.61-7.30 (m, 8H), 7.21 (dt,  $J_d = 1.3\text{ Hz}$ ,  $J_t = 7.5\text{ Hz}$ , 1H), 7.14-7.10 (m, 2H), 6.72-6.68 (m, 1H), 2.45 (t,  $J = 7.0\text{ Hz}$ , 2H), 1.65-1.57 (m, 2H), 1.46-1.30 (m, 4H), 0.91 (t,  $J = 7.2\text{ Hz}$ , 3H);  $^{13}\text{C NMR}$   $\delta$  141.3, 139.4, 136.6, 132.5, 131.8, 130.3, 128.9, 128.6, 128.4, 127.8, 126.7, 126.4, 126.3, 125.6, 123.1, 121.8, 101.9, 96.1, 86.9, 64.8, 31.2, 28.4, 22.3, 20.4, 14.1; HRMS(ESI) calcd for  $\text{C}_{27}\text{H}_{24}\text{NaS}_2$  ( $\text{M}+\text{Na}$ ): 435.1212; found: 435.1212.

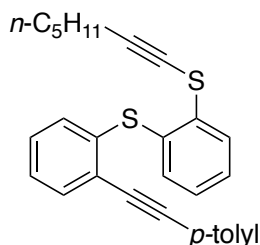

**[Hept-1-ynyl][(2-((2-(4-methylphenylethynyl)phenyl)sulfanyl)phenyl)]sulfane (6c).** Isolated by preparative TLC (hexane/CH<sub>2</sub>Cl<sub>2</sub> = 5/1). The title compound was obtained as a yellow oil (40%). <sup>1</sup>H NMR δ 7.81 (dd, *J* = 0.9, 7.9 Hz, 1H), 7.50-7.41 (m, 5H), 7.23-7.09 (m, 5H), 6.70-6.67 (m, 1H), 2.45 (t, *J* = 7.1 Hz, 2H), 2.36(s, 3H), 1.64-1.59 (m, 2H), 1.46-1.30 (m, 4H), 0.91 (t, *J* = 7.2 Hz, 3H); <sup>13</sup>C NMR δ 141.3, 139.2, 138.7, 136.5, 132.4, 131.6, 130.2, 129.2, 128.7, 127.9, 126.7, 126.4, 126.2, 125.5, 122.0, 120.0, 101.8, 96.4, 86.2, 64.8, 31.1, 28.4, 22.3, 21.6, 20.4, 14.1; HRMS(ESI) calcd for C<sub>28</sub>H<sub>26</sub>NaS<sub>2</sub> (M+Na): 449.1368; found: 449.1368.

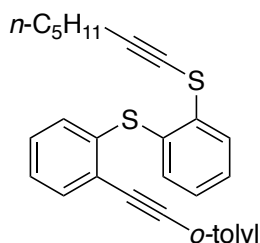

**[Hept-1-ynyl][(2-((2-(2-methylphenylethynyl)phenyl)sulfanyl)phenyl)]sulfane (6d).** Isolated by preparative TLC (hexane/CH<sub>2</sub>Cl<sub>2</sub> = 5/1). The title compound was obtained as a yellow oil (38%). <sup>1</sup>H NMR δ 7.82 (dd, *J* = 1.2, 8.0 Hz, 1H), 7.57-7.48 (m, 3H), 7.43 (dt, *J<sub>d</sub>* = 1.5 Hz, *J<sub>t</sub>* = 7.9 Hz, 1H), 7.24-7.20 (m, 3H), 7.19-7.14 (m, 1H), 7.12-7.08 (m, 2H), 6.70-6.66 (m, 1H), 2.58(s, 3H), 2.44 (t, *J* = 7.2 Hz, 2H), 1.63-1.56 (m, 2H), 1.45-1.30 (m, 4H), 0.91 (t, *J* = 7.2 Hz, 3H); <sup>13</sup>C NMR δ 141.4, 140.5, 139.2, 136.6, 132.5, 132.1, 130.2, 129.5, 128.8, 128.5, 127.7, 126.6, 126.3, 126.1, 125.5, 125.4, 122.9, 121.9, 101.8, 95.0, 90.6, 64.8, 31.1, 28.3, 22.2, 21.1, 20.3, 14.0; HRMS(ESI) calcd for C<sub>28</sub>H<sub>26</sub>NaS<sub>2</sub> (M+Na): 449.1368; found: 449.1369.

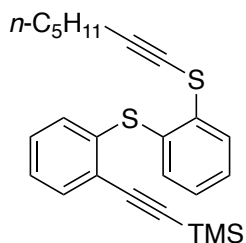

**[Hept-1-ynyl][(2-((2-(trimethylsilylethynyl)phenyl)sulfanyl)phenyl)]sulfane (6e).** Isolated by preparative TLC (hexane only). The title compound was obtained as a pale yellow oil (40%). <sup>1</sup>H NMR δ 7.80 (d, *J* = 7.9 Hz, 1H), 7.48-7.41 (m, 3H), 7.22-7.18 (m, 1H), 7.11-7.04 (m, 2H), 6.66 (d, *J* = 7.8 Hz, 1H), 2.46 (t, *J* = 7.6 Hz, 2H), 1.64-1.57 (m, 2H), 1.46-1.32 (m, 4H), 0.92 (t, *J* = 7.7 Hz, 3H), 0.28 (s, 9H); <sup>13</sup>C NMR δ 141.3, 139.7, 136.4, 132.9, 130.1, 129.1, 128.0, 126.6, 126.4, 126.3, 125.4, 121.7, 102.0, 101.8, 101.7, 64.9, 31.2, 28.4, 22.3, 20.4, 14.1, 0.0; HRMS(ESI) calcd for C<sub>24</sub>H<sub>28</sub>NaS<sub>2</sub>Si (M+Na): 431.1294; found: 431.1294.

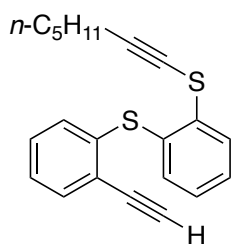

**[Hept-1-ynyl] [(2-((2-(ethynyl)phenyl)sulfanyl)phenyl)]sulfane (6f)**. Diyne having trimethylsilyl group (**6e**, 100.8 mg, 0.3 mmol) was dissolved in methanol (1.3 ml) and tetrahydrofuran (1.3 ml). After addition of KOH (30.5 mg, 0.5 mmol) and water (0.13 ml), the mixture was stirred at room temperature. After 2 h, the solvents were removed, and the residue was purified by preparative TLC (hexane/CH<sub>2</sub>Cl<sub>2</sub>) to give corresponding diyne (**6f**, 78%) as a yellow oil. <sup>1</sup>H NMR δ 7.87-7.85 (m, 1H), 7.54-7.48 (m, 3H), 7.29-7.24 (m, 1H), 7.19-7.10 (m, 2H), 6.70-6.68 (m, 1H), 3.53 (s, 1H), 2.50 (t, *J* = 7.1 Hz, 2H), 1.68-1.61 (m, 2H), 1.50-1.36 (m, 4H), 0.95 (t, *J* = 7.2 Hz, 3H); <sup>13</sup>C NMR δ 141.6, 139.9, 136.8, 133.4, 130.5, 129.5, 127.3, 126.8, 126.4, 126.2, 125.5, 120.5, 101.9, 83.9, 80.9, 64.8, 31.2, 28.4, 22.3, 20.4, 14.1; HRMS(ESI) calcd for C<sub>21</sub>H<sub>20</sub>NaS<sub>2</sub> (M+Na): 359.0899; found: 359.0899.

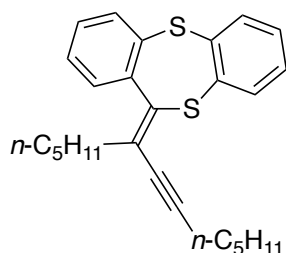

**(Z)-11-(1-Pentyl-1-oct-2-ynylidene)-11H-dibenzo[b,e][1,4]dithiopyne (7a)**. [Rh(cod)<sub>2</sub>]OTf (3.1 mg, 0.005 mmol) and rac-BINAP (3.1 mg, 0.005 mmol) were placed in Schlenk tube, which was then evacuated and backfilled with argon (3×), the reaction vessel was filled with argon. 1,2-Dichloroethane (0.1 mL) was added to the flask and the mixture was stirred to give a yellowish solution. Then, a 1,2-dichloroethane solution (0.9 mL) of diyne (0.10 mmol) was added and the mixture was stirred at 80 °C. The volatiles were removed under reduced pressure, and the crude products were isolated by preparative TLC (hexane/toluene = 3/1). The title compound was obtained as a colorless oil (93%). <sup>1</sup>H NMR δ 7.60-7.55 (m, 1H), 7.52 (dd, *J* = 1.5, 7.6 Hz, 1H), 7.33 (m, 2H), 7.25-7.19 (m, 2H), 7.08 (dt, *J<sub>d</sub>* = 1.6 Hz, *J<sub>t</sub>* = 7.6 Hz, 1H), 7.01 (dt, *J<sub>d</sub>* = 1.5 Hz, *J<sub>t</sub>* = 7.4 Hz, 1H), 2.50 (t, *J* = 7.2 Hz, 2H), 2.03 (t, *J* = 7.9 Hz, 2H), 1.69-1.45 (m, 6H), 1.41-1.32 (m, 2H), 1.25-1.08 (m, 4H), 0.92 (t, *J* = 6.9 Hz, 3H), 0.82 (t, *J* = 7.2 Hz, 3H); <sup>13</sup>C NMR δ 140.4, 138.9, 137.4, 137.0, 136.9, 134.3, 133.8, 130.2, 130.2, 129.4, 129.2, 128.9, 126.9, 120.2, 100.2, 79.0, 33.8, 31.2, 31.1, 28.6, 28.2, 22.4, 22.3, 20.0, 14.2, 14.1; HRMS(ESI) calcd for C<sub>26</sub>H<sub>30</sub>NaS<sub>2</sub> (M+Na): 429.1681; found: 429.1681.

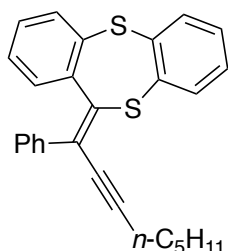

**(Z)-11-(1-Phenyl-1-oct-2-ynylidene)-11H-dibenzo[b,e][1,4]dithiopyne (7b)**. Isolated by preparative TLC (hexane/toluene = 3/1). The title compound was obtained as a pale yellow oil (76%). <sup>1</sup>H NMR δ 7.62 (dd, *J* = 1.6, 7.1 Hz, 1H), 7.56 (dd, *J* = 1.1, 7.8 Hz, 1H), 7.42 (dd, *J* = 1.7, 7.8 Hz, 1H), 7.17-7.01 (m, 8H), 6.96 (dt, *J<sub>d</sub>* = 1.2 Hz, *J<sub>t</sub>* = 7.5 Hz, 1H), 6.78 (dd, *J* = 1.1, 7.9 Hz, 1H), 2.56 (t, *J* = 7.2 Hz, 2H), 1.73-1.66 (m, 2H), 1.55-1.48 (m, 2H), 1.42-1.33 (m, 2H), 0.93 (t, *J* = 7.6 Hz, 3H); <sup>13</sup>C NMR δ 138.9, 138.5, 136.2, 136.2, 136.0, 135.6, 132.1, 131.5, 129.7, 128.9, 127.6, 127.4, 127.1, 127.0, 125.6, 125.5, 124.6, 116.0, 99.5, 77.4, 29.2, 26.4, 20.2, 18.0, 12.1; HRMS(ESI) calcd for C<sub>27</sub>H<sub>24</sub>NaS<sub>2</sub> (M+Na): 435.1212; found: 435.1212.

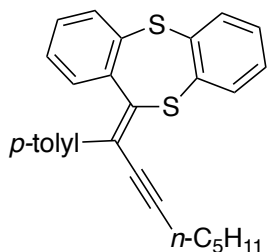

**(Z)-11-(1-(4-Methylphenyl)-1-oct-2-ynylidene)-11H-dibenzo[*b,e*][1,4]dithiepine (7c).** Isolated by preparative TLC (hexane/toluene = 3/1). The title compound was obtained as a pale yellow oil (67%).  $^1\text{H}$  NMR  $\delta$  7.62 (dd,  $J = 1.7, 7.2$  Hz, 1H), 7.57 (dd,  $J = 1.1, 7.5$  Hz, 1H), 7.41 (dd,  $J = 1.7, 7.8$  Hz, 1H), 7.17-7.08 (m, 3H), 7.01-6.97 (m, 1H), 6.92-6.86 (m, 4H), 6.81 (dd,  $J = 1.3, 7.8$  Hz, 1H), 2.55 (t,  $J = 7.3$  Hz, 2H), 2.21 (s, 3H), 1.73-1.65 (m, 2H), 1.54-1.48 (m, 2H), 1.42-1.34 (m, 2H), 0.93 (t,  $J = 7.2$  Hz, 3H);  $^{13}\text{C}$  NMR  $\delta$  140.9, 140.2, 138.5, 138.0, 137.6, 136.5, 135.4, 134.2, 133.7, 131.8, 131.0, 129.8, 129.4, 129.2, 129.1, 128.4, 127.6, 118.2, 101.5, 79.6, 31.4, 28.6, 22.4, 21.3, 20.2, 14.2; HRMS(ESI) calcd for  $\text{C}_{28}\text{H}_{26}\text{NaS}_2$  ( $\text{M}+\text{Na}$ ): 449.1368; found: 449.1368.

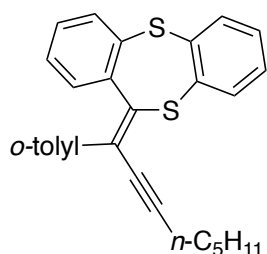

**(E)-11-(1-(2-Methylphenyl)-1-oct-2-ynylidene)-11H-dibenzo[*b,e*][1,4]dithiepine (7d).** Isolated by preparative TLC (hexane/toluene = 3/1). The title compound was obtained as a pale yellow oil (59%).  $^1\text{H}$  NMR  $\delta$  7.61 (dd,  $J = 1.5, 7.5$  Hz, 1H), 7.47 (d,  $J = 7.7$  Hz, 1H), 7.43 (dd,  $J = 1.3, 7.7$  Hz, 1H), 7.17-7.13 (m, 1H), 7.12-7.08 (m, 1H), 7.03-6.97 (m, 3H), 6.95-6.85 (m, 3H), 6.71 (d,  $J = 7.4$  Hz, 1H), 2.50 (t,  $J = 7.1$  Hz, 2H), 2.31 (s, 3H), 1.68-1.62 (m, 2H), 1.50-1.44 (m, 2H), 1.39-1.32 (m, 2H), 0.91 (t,  $J = 7.4$  Hz, 3H);  $^{13}\text{C}$  NMR  $\delta$  141.8, 139.8, 138.3, 138.2, 138.0, 137.0, 136.8, 134.1, 133.4, 131.3, 131.0, 130.0, 129.9, 129.1, 129.0, 128.9, 127.6, 127.1, 125.3, 118.1, 102.0, 78.9, 31.2, 28.5, 22.3, 20.1, 19.9, 14.1; HRMS(ESI) calcd for  $\text{C}_{28}\text{H}_{26}\text{NaS}_2$  ( $\text{M}+\text{Na}$ ): 449.1368; found: 449.1368.

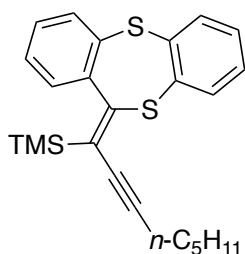

**(E)-11-(1-Trimethylsilyl-1-oct-2-ynylidene)-11H-dibenzo[*b,e*][1,4]dithiepine (7e).** Isolated by preparative TLC (hexane/toluene = 3/1). The title compound was obtained as a pale yellow oil (90%).  $^1\text{H}$  NMR  $\delta$  7.84 (dt,  $J_d = 1.7$  Hz,  $J_t = 7.2$  Hz, 1H), 7.82-7.80 (m, 1H), 7.65 (dd,  $J = 1.6, 7.4$  Hz, 1H), 7.58-7.50 (m, 3H), 7.84 (dt,  $J_d = 1.7$  Hz,  $J_t = 7.4$  Hz, 1H), 7.35 (dt,  $J_d = 1.6$  Hz,  $J_t = 7.3$  Hz, 1H), 2.82 (t,  $J = 7.7$  Hz, 2H), 1.97-1.88 (m, 2H), 1.84-1.60 (m, 4H), 1.20 (t,  $J = 7.7$  Hz, 3H), 0.15 (s, 9H);  $^{13}\text{C}$  NMR  $\delta$  152.4, 142.1,

139.2, 139.0, 137.9, 134.5, 133.9, 131.3, 131.3, 130.2, 129.7, 129.3, 127.9, 120.4, 104.8, 80.7, 31.6, 29.1, 22.6, 20.6, 14.5, 0.0; HRMS(ESI) calcd for C<sub>24</sub>H<sub>28</sub>NaS<sub>2</sub>Si (M+Na): 431.1294 found: 431.1294.

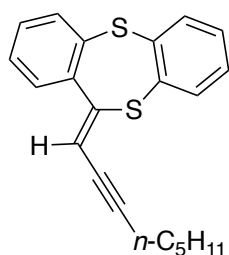

**(Z)-11-(Oct-2-ynylidene)-11H-dibenzo[b,e][1,4]dithiepine (7f).** Isolated by preparative TLC (hexane/toluene = 3/1). The title compound was obtained as a yellow oil (92%). <sup>1</sup>H NMR δ 7.63-7.62 (m, 1H), 7.56-7.54 (m, 1H), 7.49-7.48 (m, 1H), 7.31-7.28 (m, 2H), 7.23-7.19 (m, 1H), 7.18-7.13 (m, 2H), 5.50 (t, *J* = 2.3 Hz, 1H), 2.51 (dt, *J<sub>d</sub>* = 2.3 Hz, *J<sub>t</sub>* = 7.1 Hz, 2H), 1.68-1.63 (m, 2H), 1.52-1.46 (m, 2H), 1.41-1.34 (m, 2H), 0.93 (t, *J* = 7.2 Hz, 3H); <sup>13</sup>C NMR δ 146.7, 141.3, 139.7, 137.2, 136.4, 133.9, 133.8, 131.8, 130.0, 129.7, 129.5, 129.3, 128.4, 105.6, 101.2, 77.0, 31.2, 28.5, 22.3, 20.0, 14.1; HRMS(ESI) calcd for C<sub>21</sub>H<sub>20</sub>NaS<sub>2</sub> (M+Na): 359.0899; found: 359.0899.

#### iv) Experimental details and characterization data for complex A

A 1,2-dichloroethane solution (0.5 mL) of sulfide **1a** (7.5 mg, 0.01 mmol) and [Rh(cod)(dppe)]OTf (9.5 mg, 0.01 mmol) was stirred at 80 °C for 30 minutes. Then, acetonitrile (0.5 ml) was added and stirred at 80 °C for 2 h. After removing all volatiles under reduced pressure, reprecipitation using gave complex **A** (4.2 mg, 33%) as an orange solid: <sup>1</sup>H NMR δ 8.30-8.15 (m, 4H), 7.97-7.90 (m, 2H), 7.57-7.40 (m, 5H), 7.38-7.31 (m, 2H), 7.21-7.08 (m, 3H), 6.90-6.82 (m, 3H), 6.74-6.62 (m, 3H), 6.60-6.54 (m, 1H), 6.40-6.34 (m, 1H), 3.33-2.63 (m, 4H), 1.78 (s, 3H), 1.35 (t, *J* = 6.8 Hz, 2H), 1.03-0.93 (m, 2H), 0.80-0.64 (m, 4H), 0.71 (t, *J* = 7.5 Hz, 3H); <sup>31</sup>P NMR δ 48.94 (d, *J<sub>PRh</sub>* = 100.3 Hz), 42.87 (d, *J<sub>PRh</sub>* = 95.9 Hz). HRMS(ESI) calcd for C<sub>40</sub>H<sub>42</sub>P<sub>2</sub>RhS<sub>2</sub> (M): 751.1253; found: 751.1248.



iv) Copies of  $^1\text{H}$  NMR and  $^{13}\text{C}$  NMR spectra for new compounds

single\_pulse

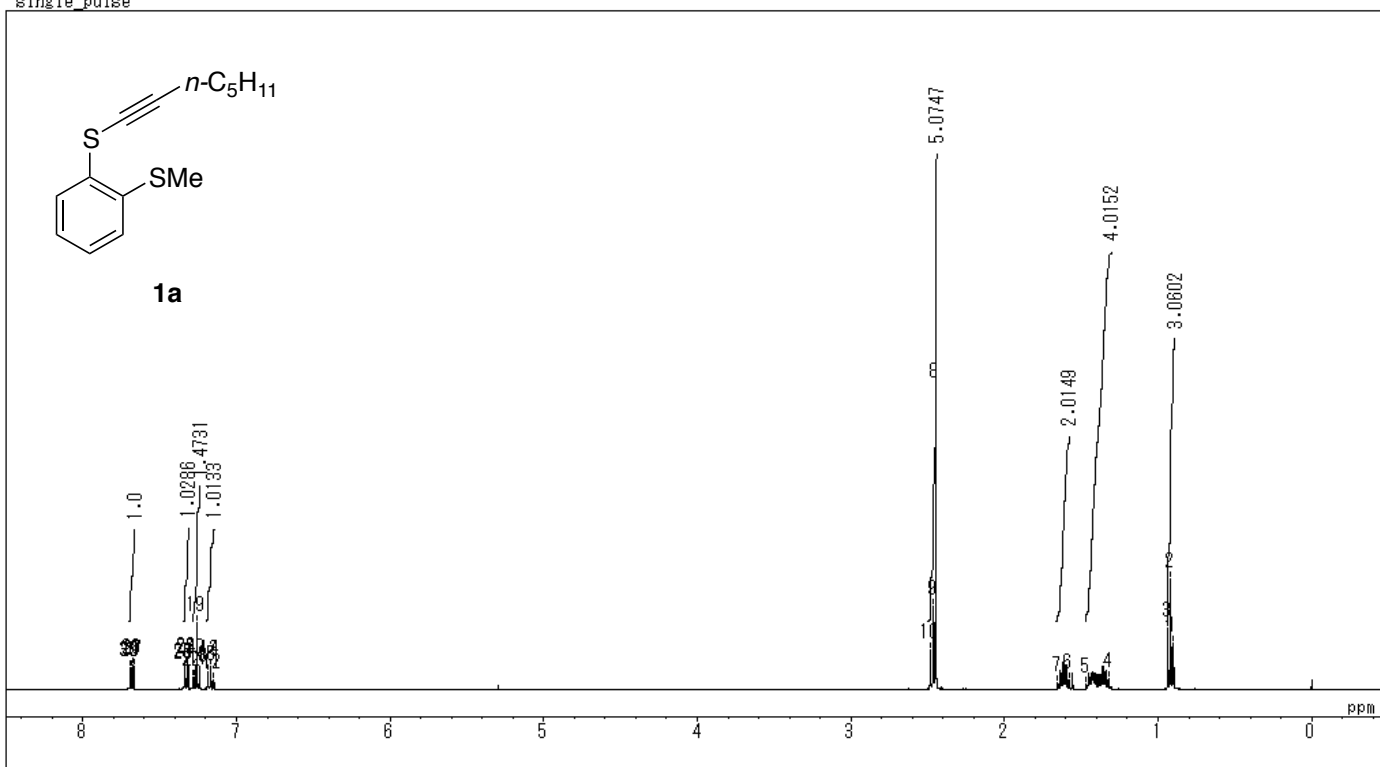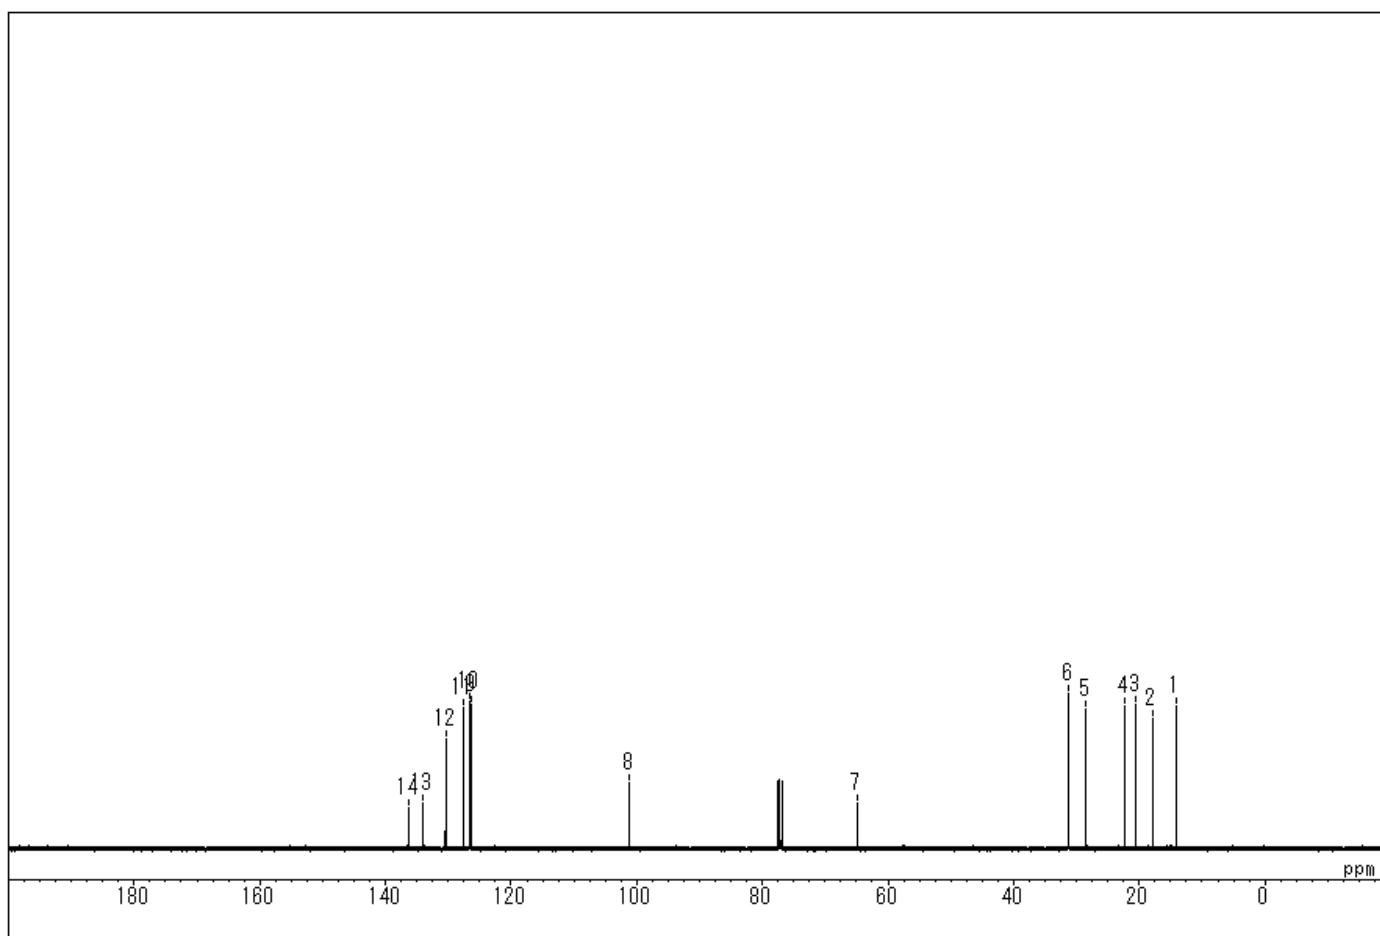

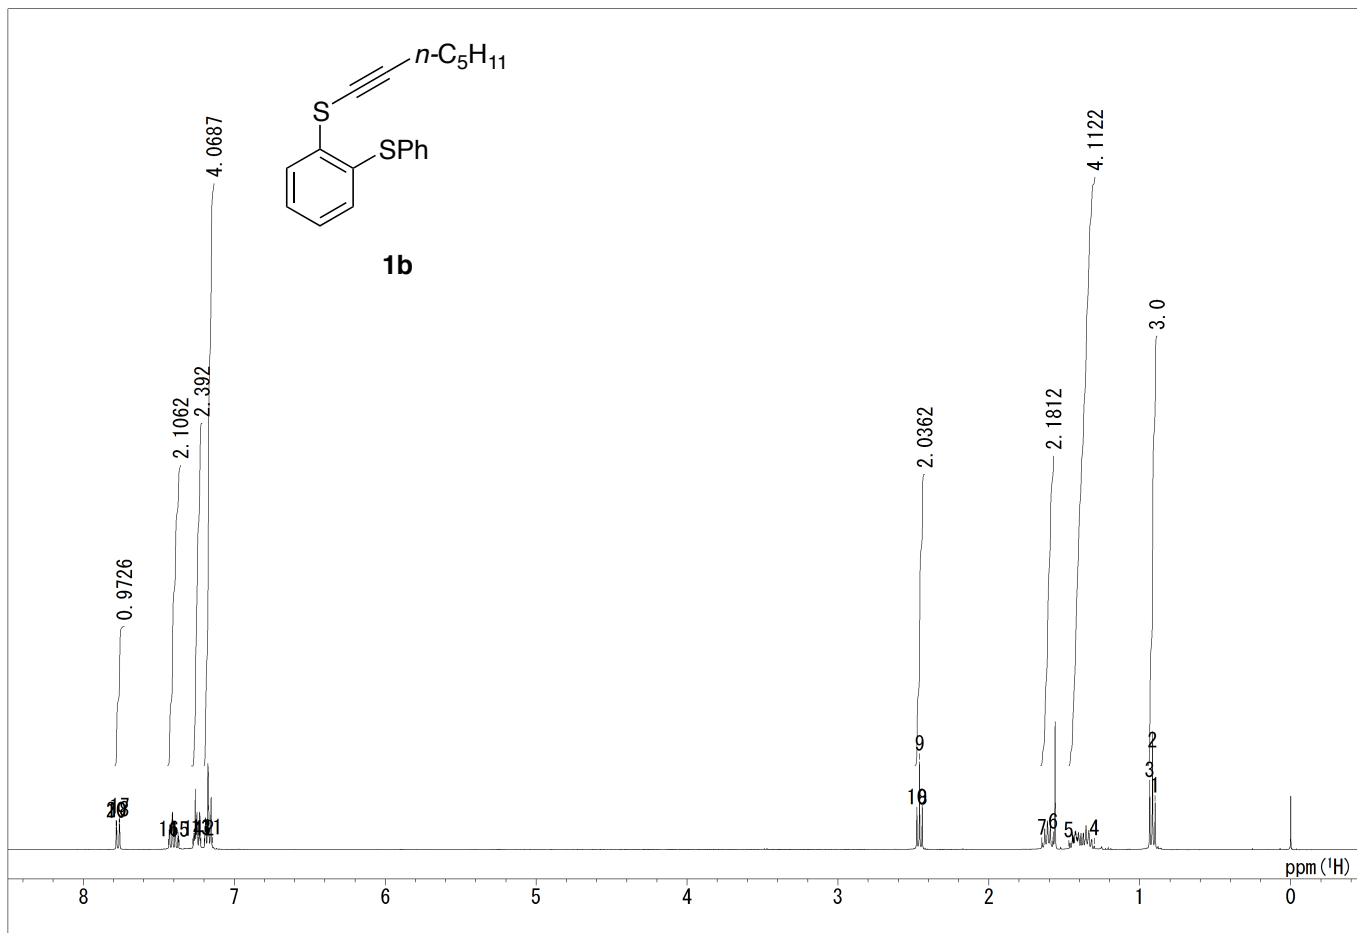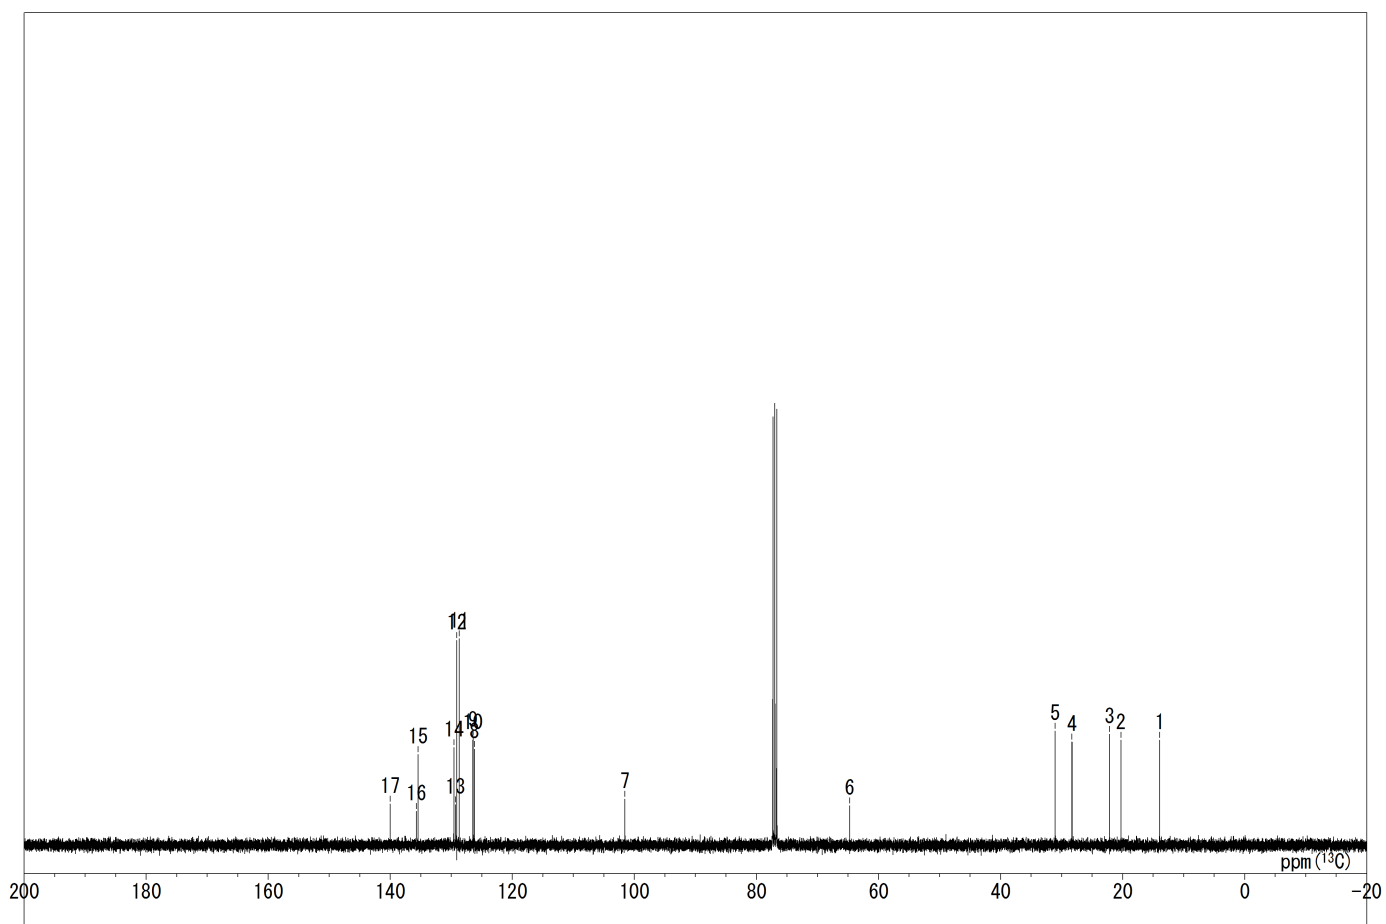

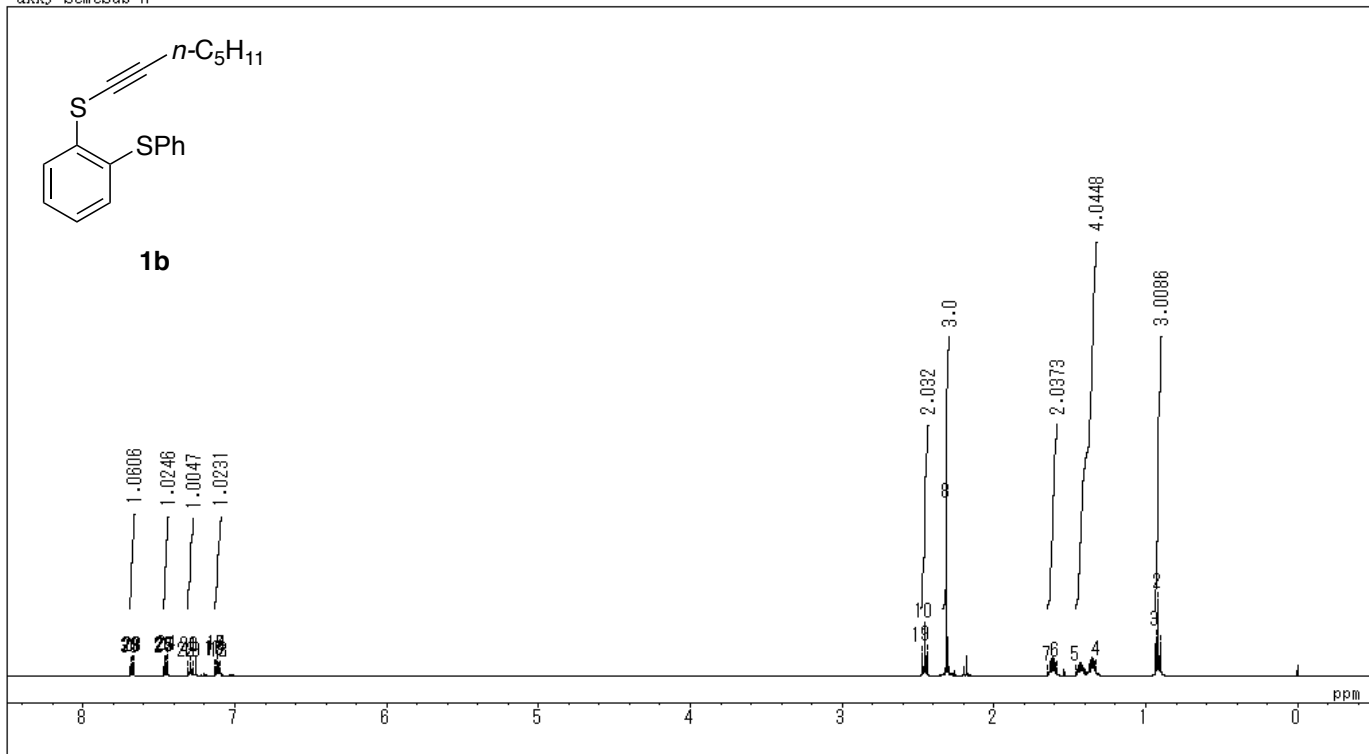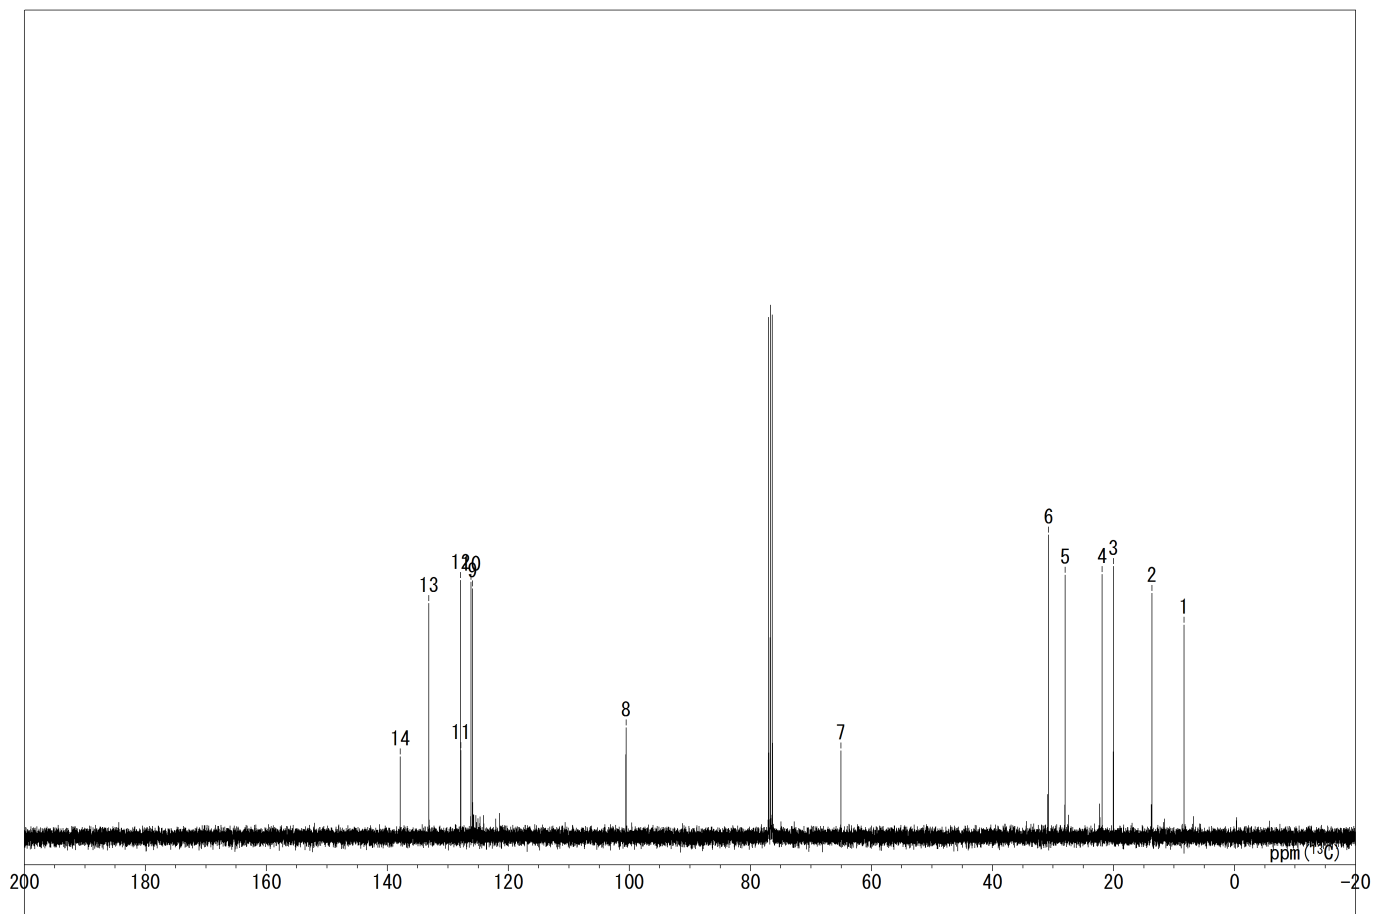

SH538286

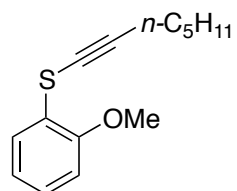**1d**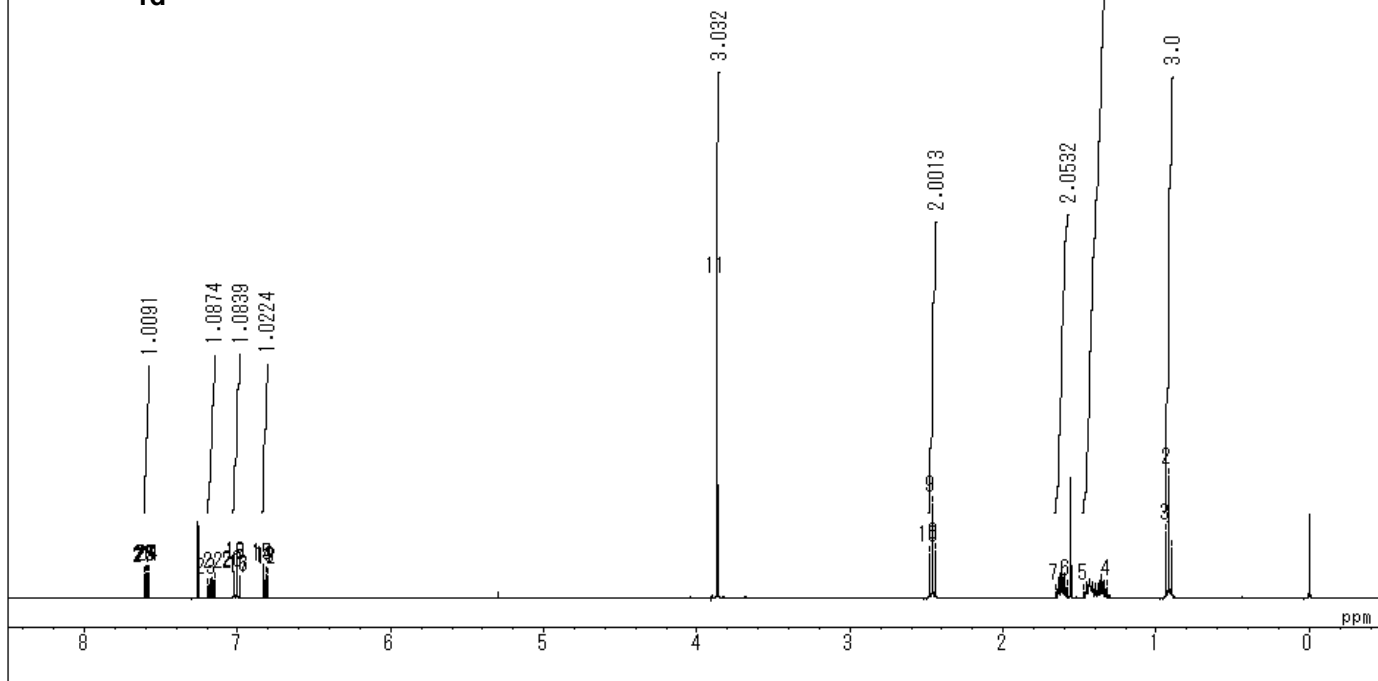

akky-Pent-OMe-Sub\_C

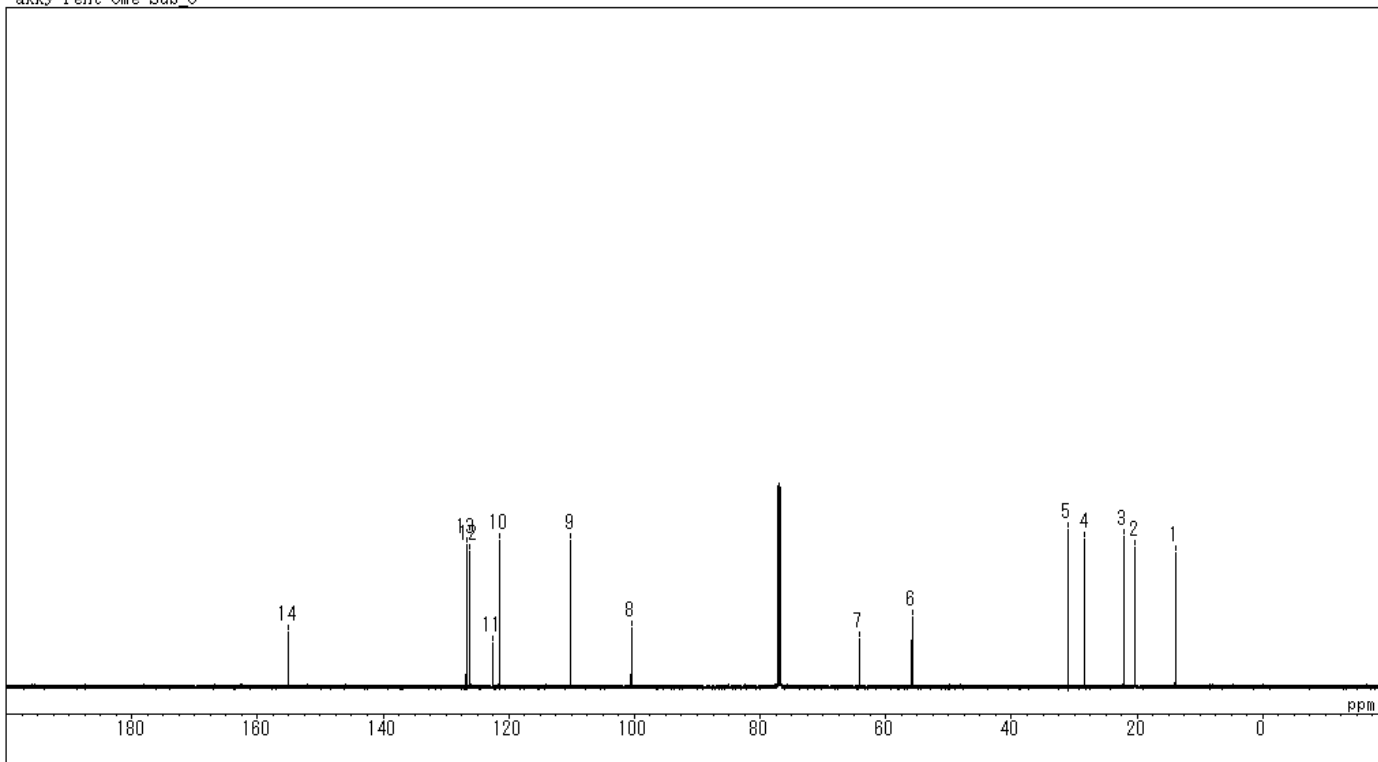

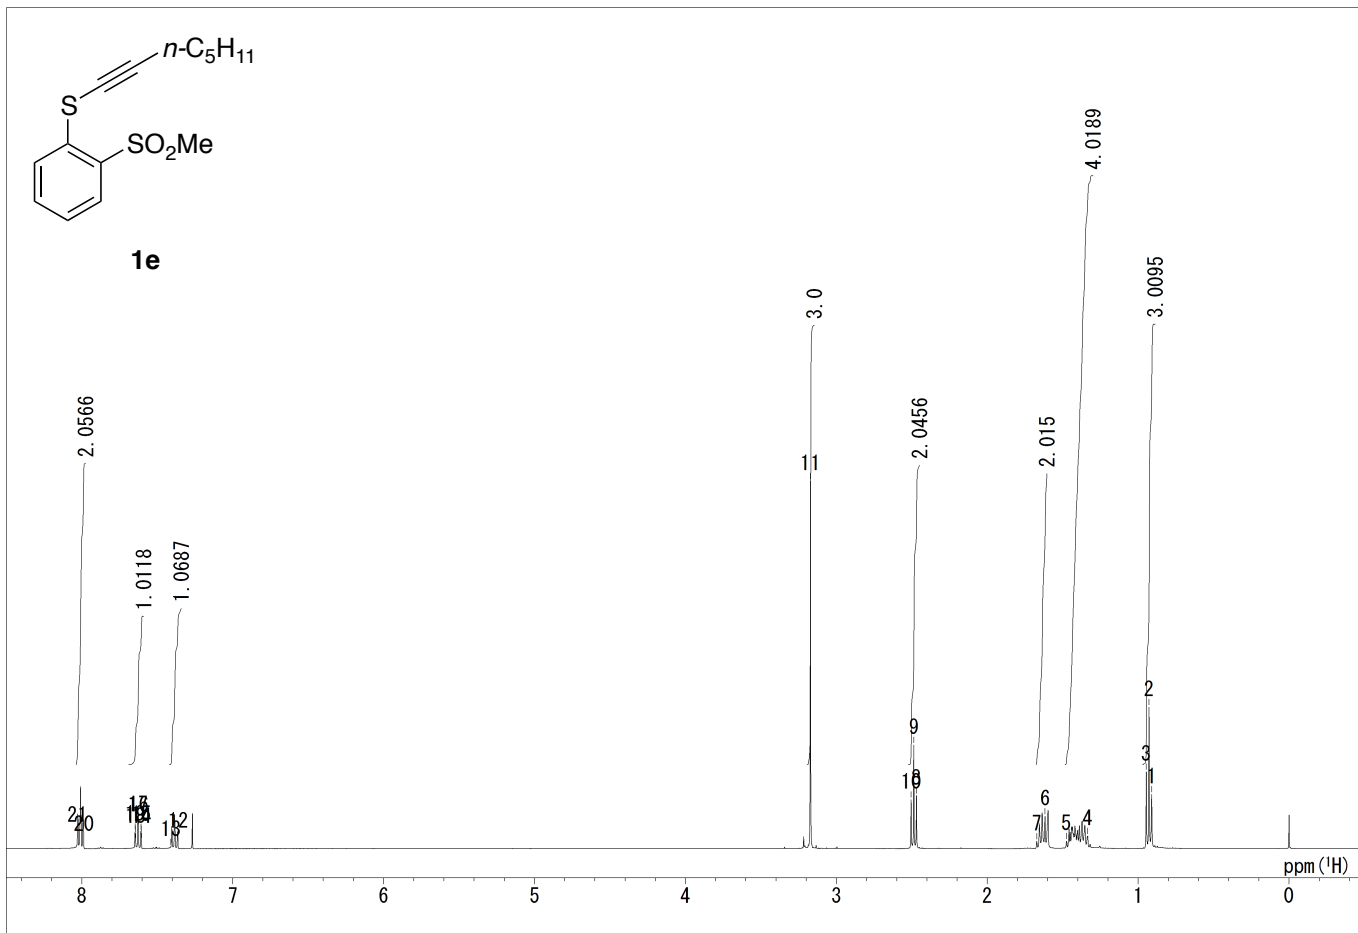

S#831434

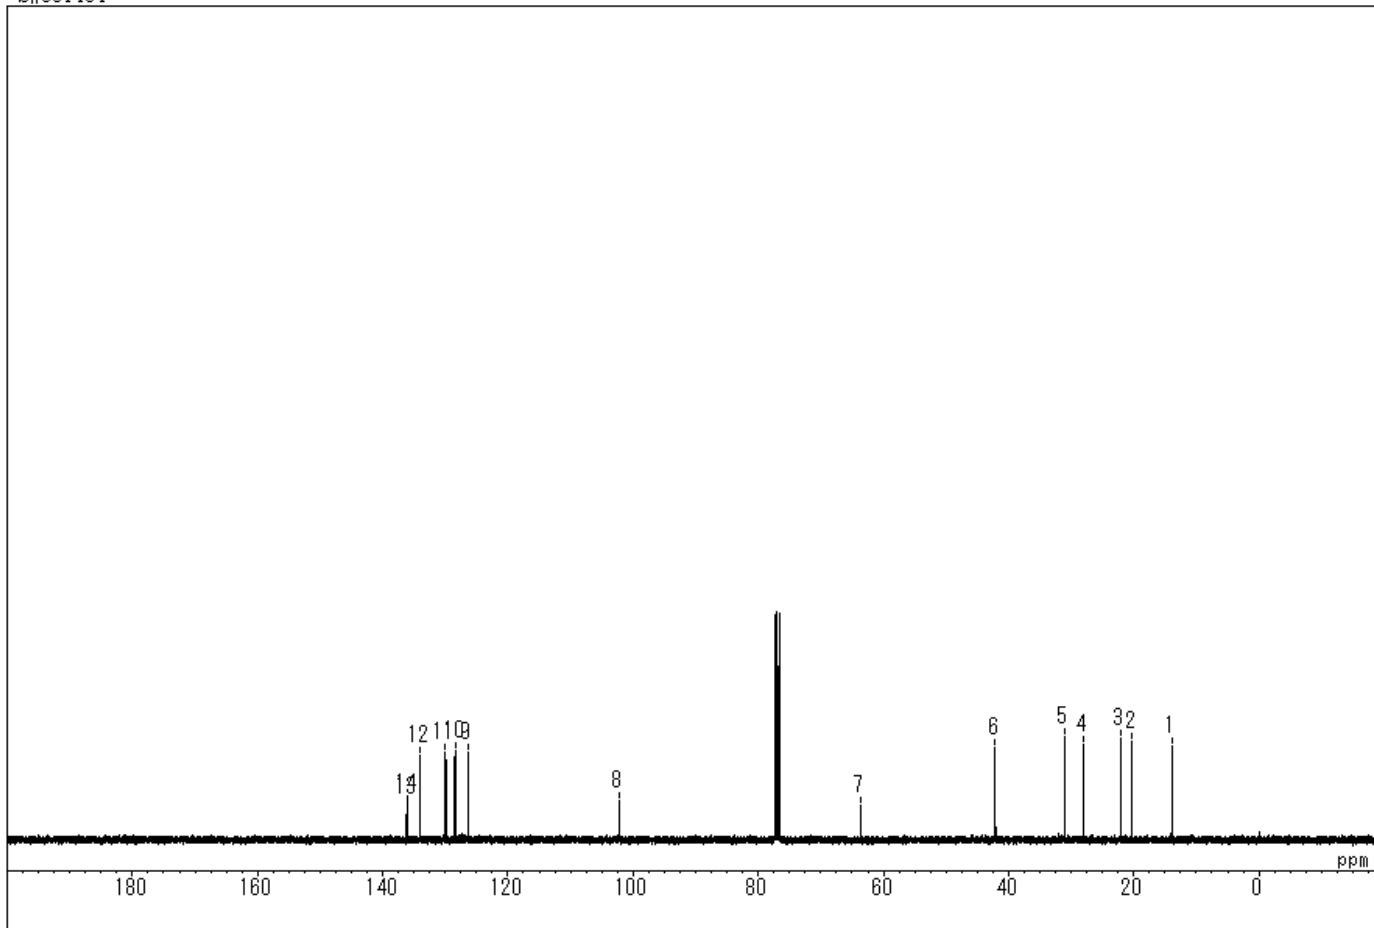

akky-Ph-SMe-sub\_H

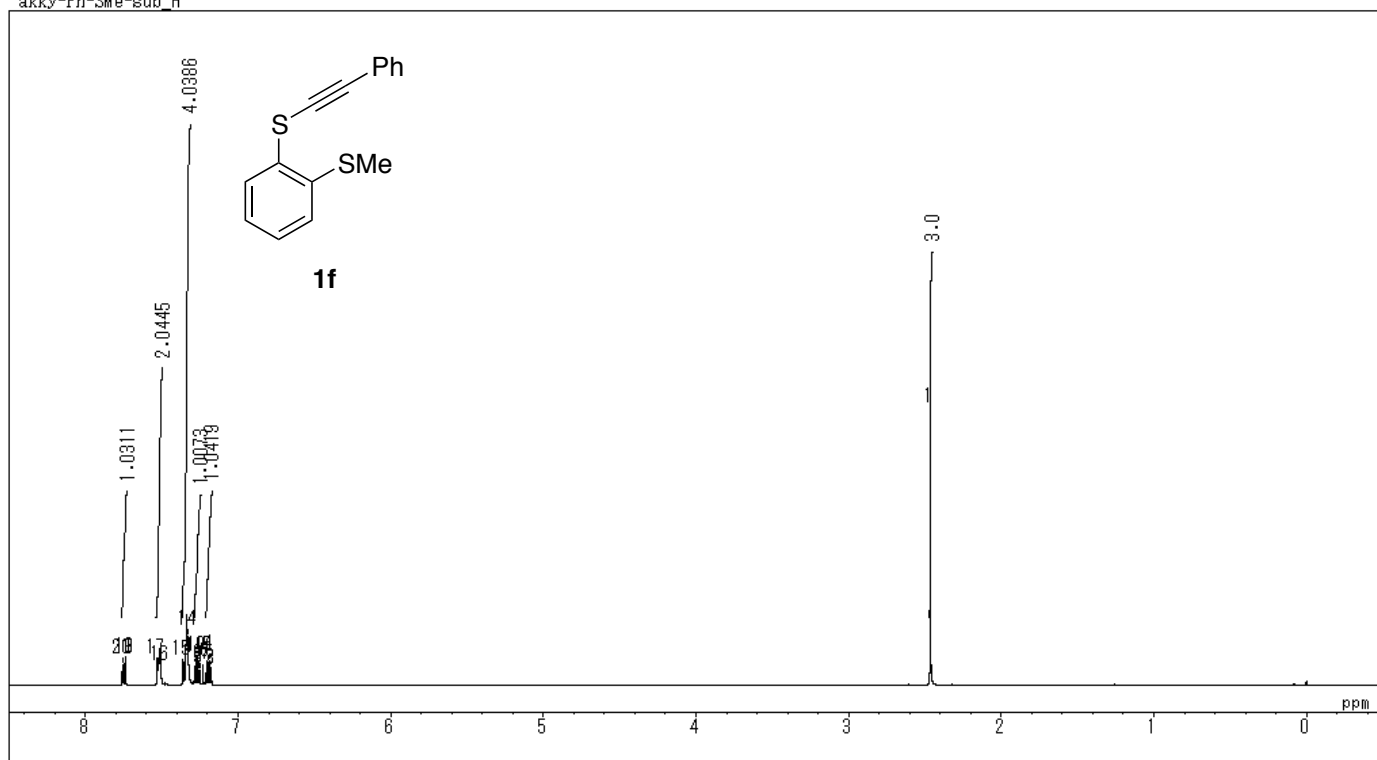

akky-Ph-SMe-sub\_C

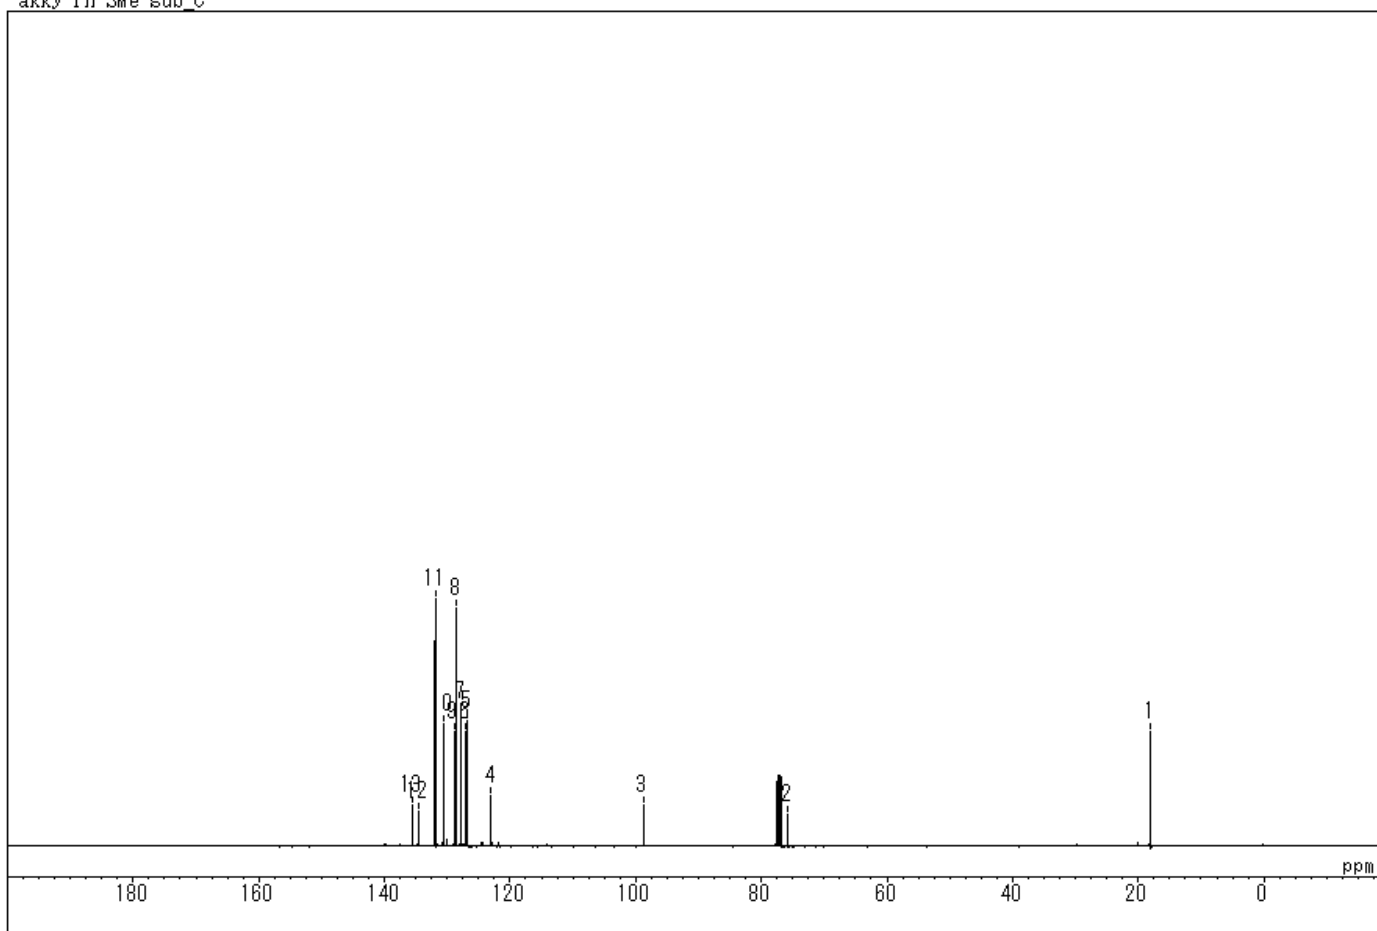

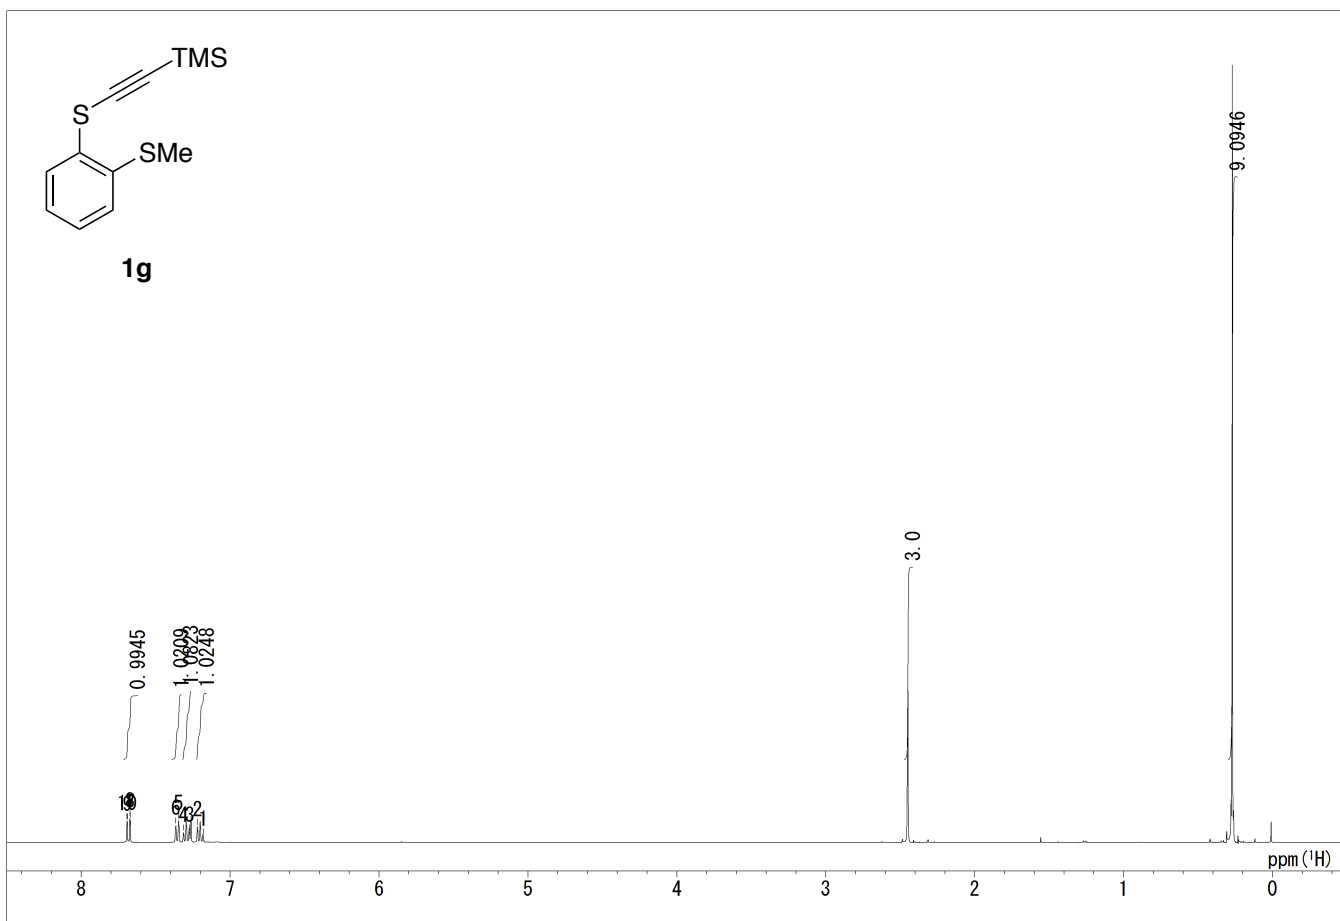

S#559573

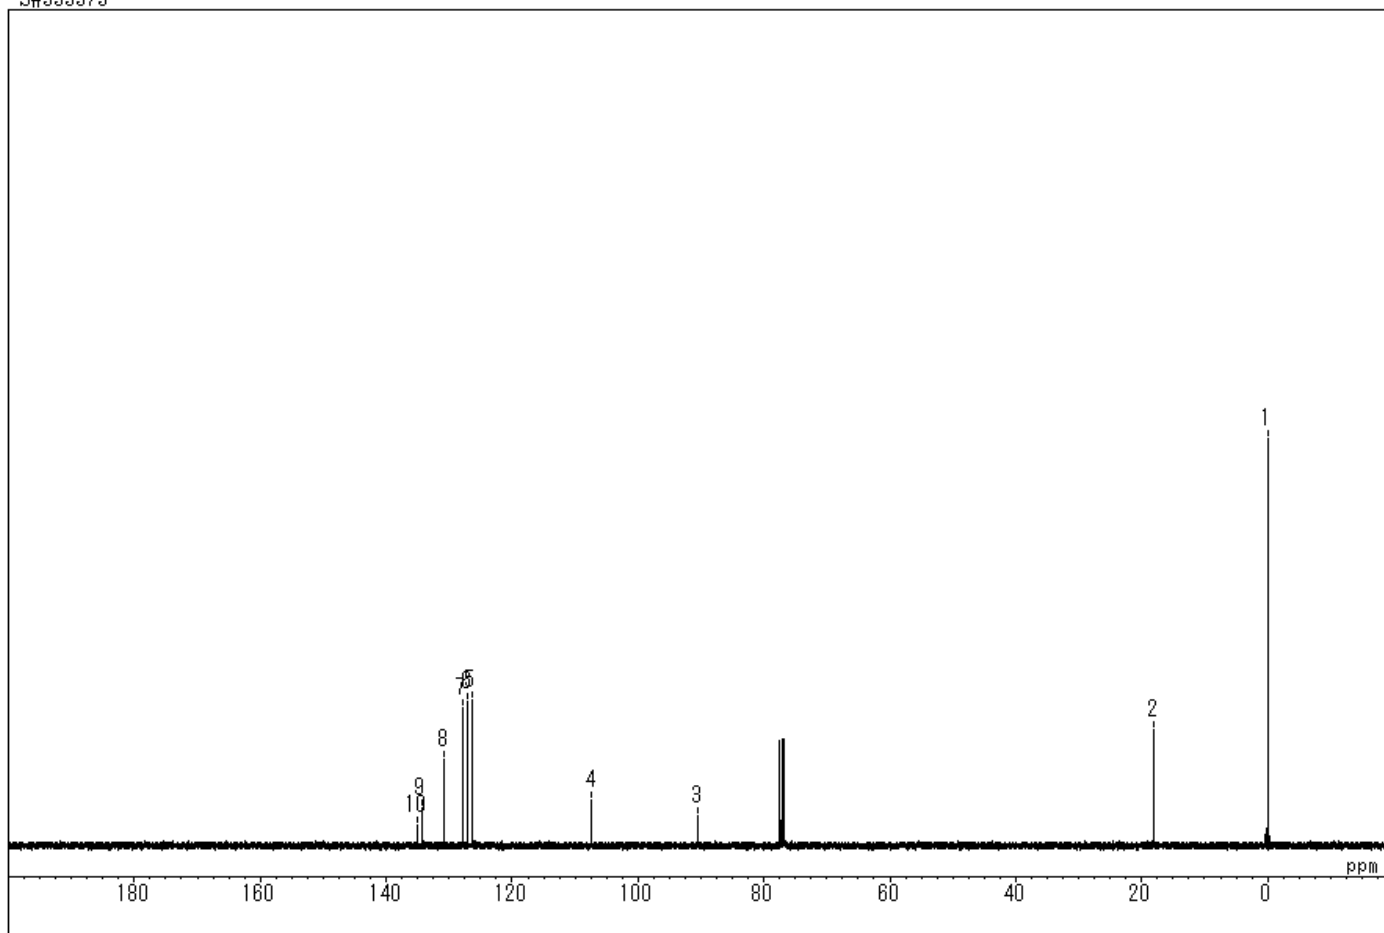

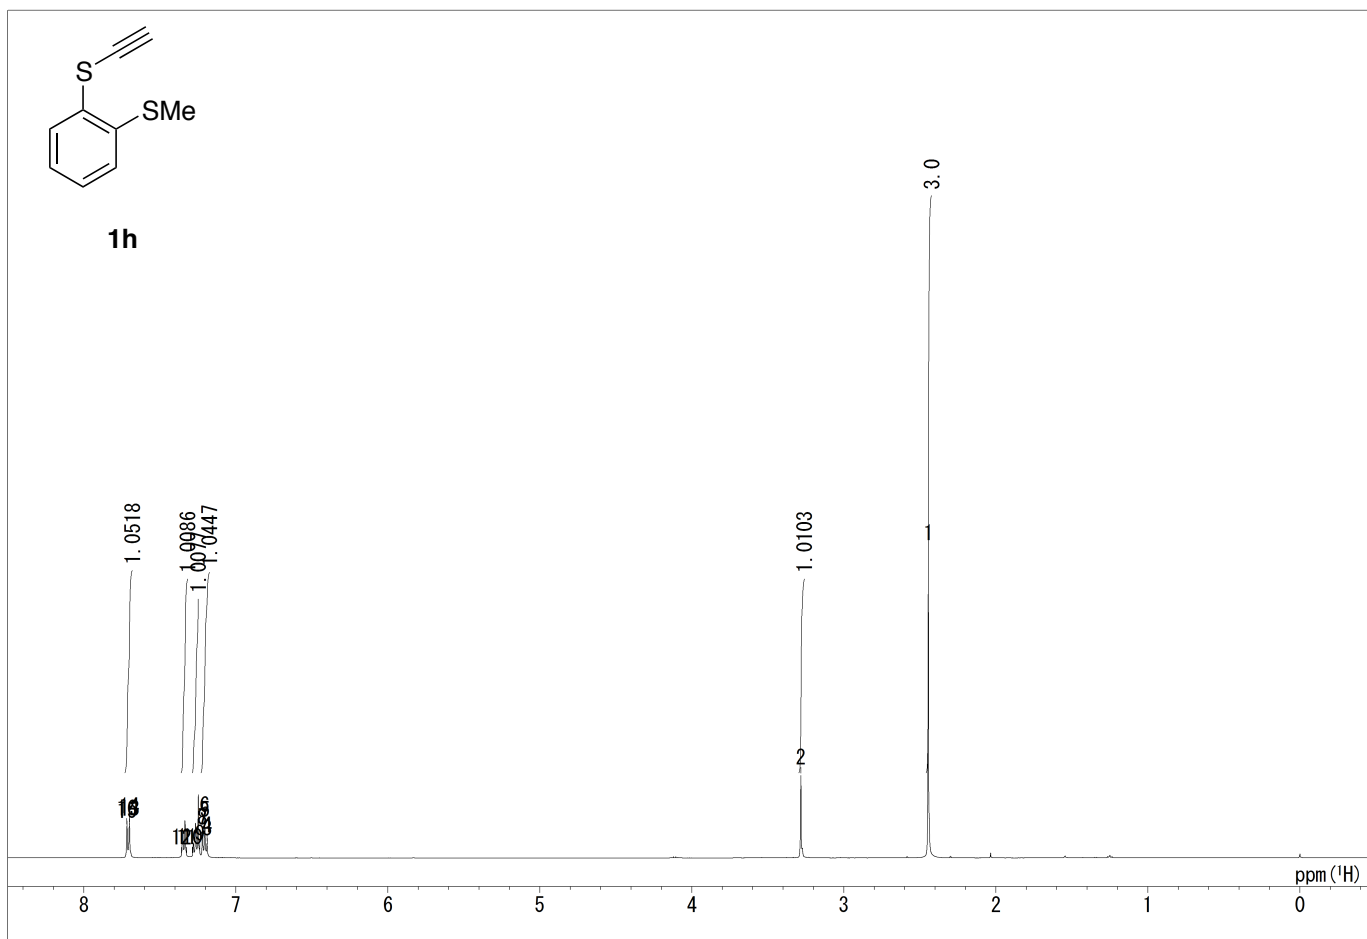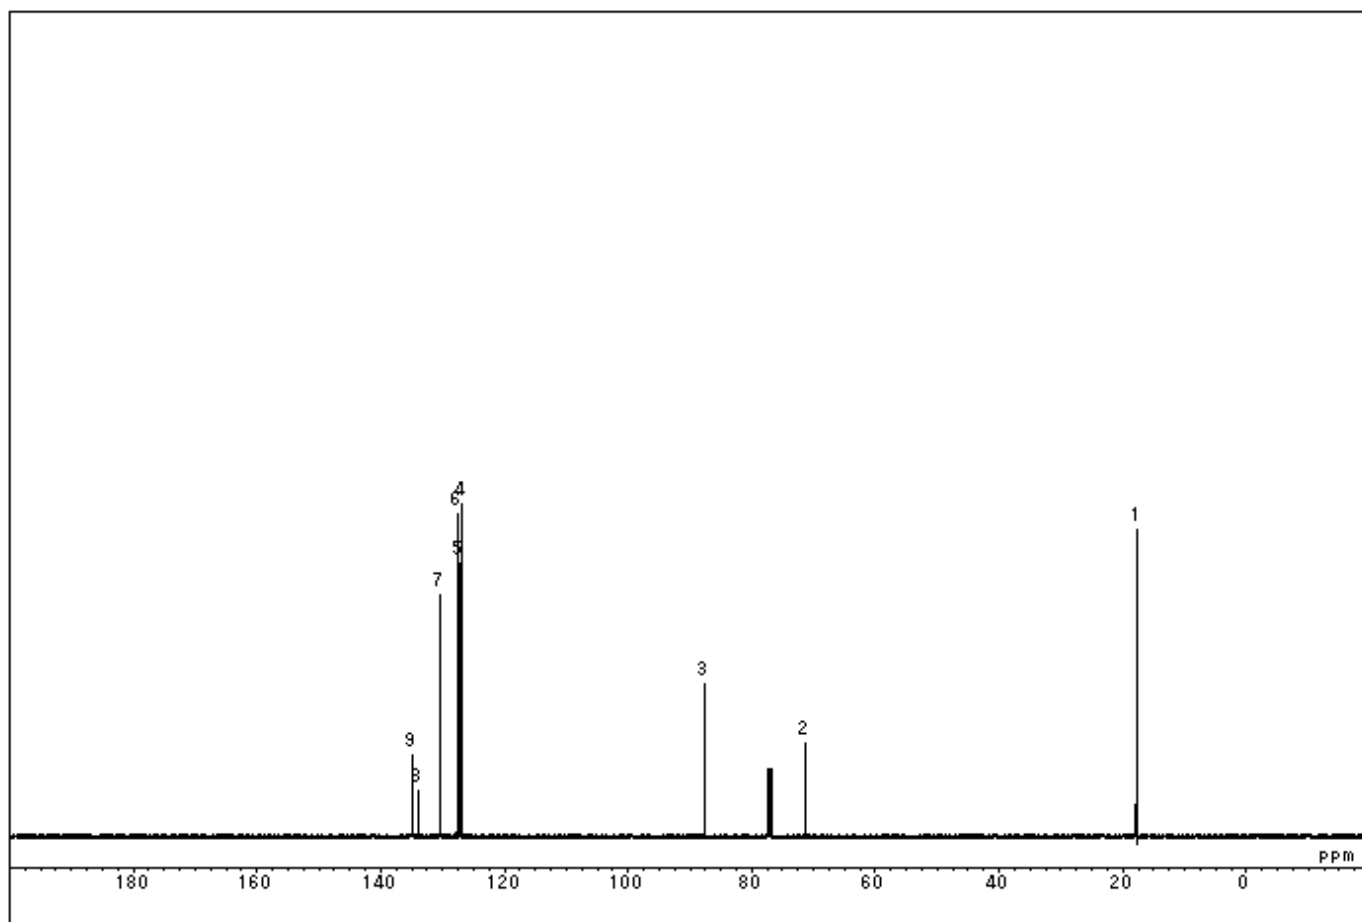



akky-modelpro II

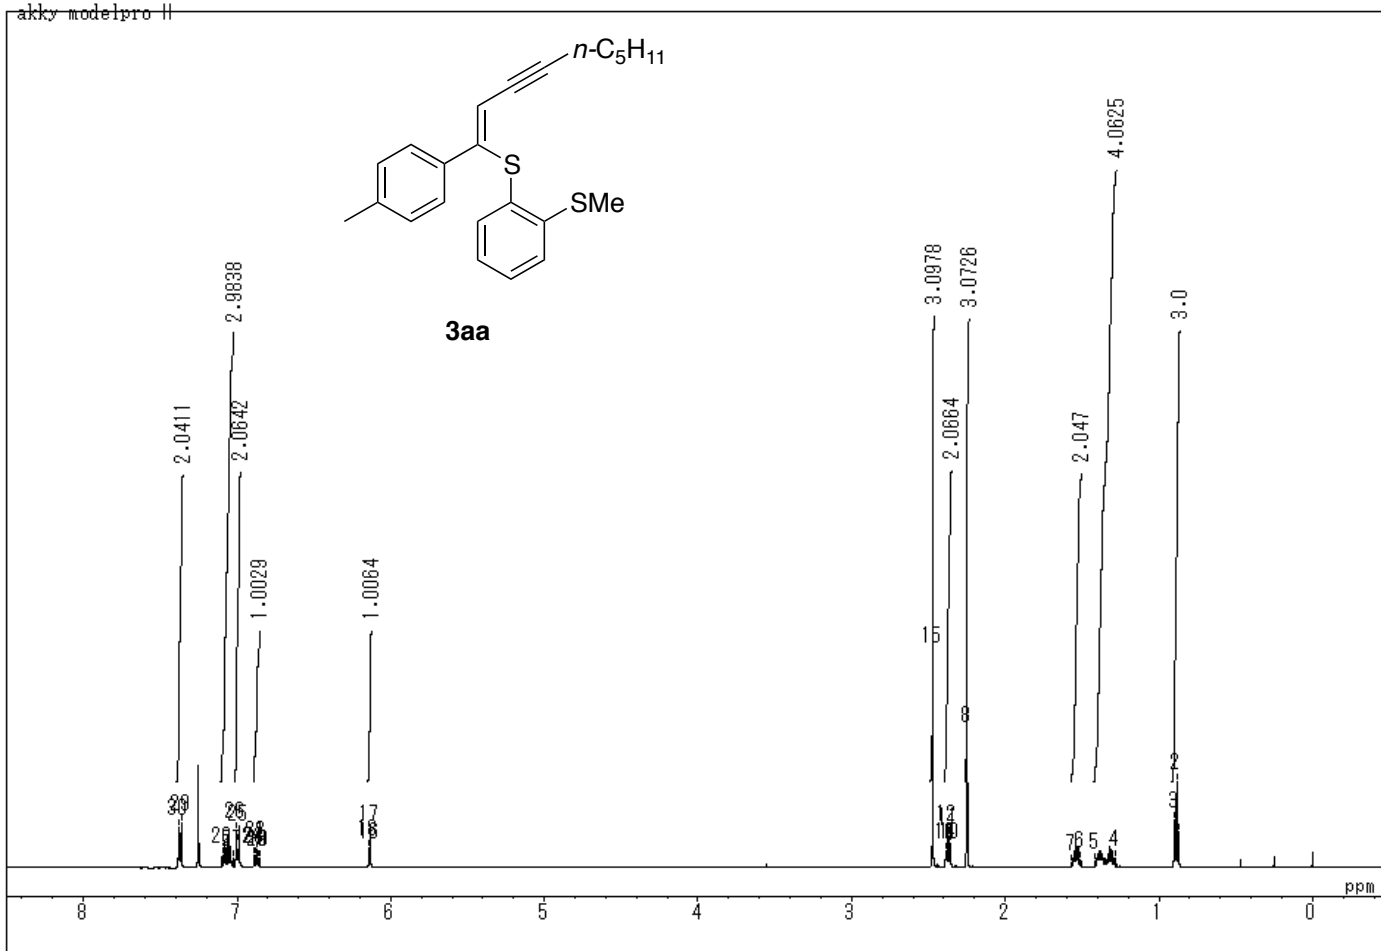

akky-modelpro-C

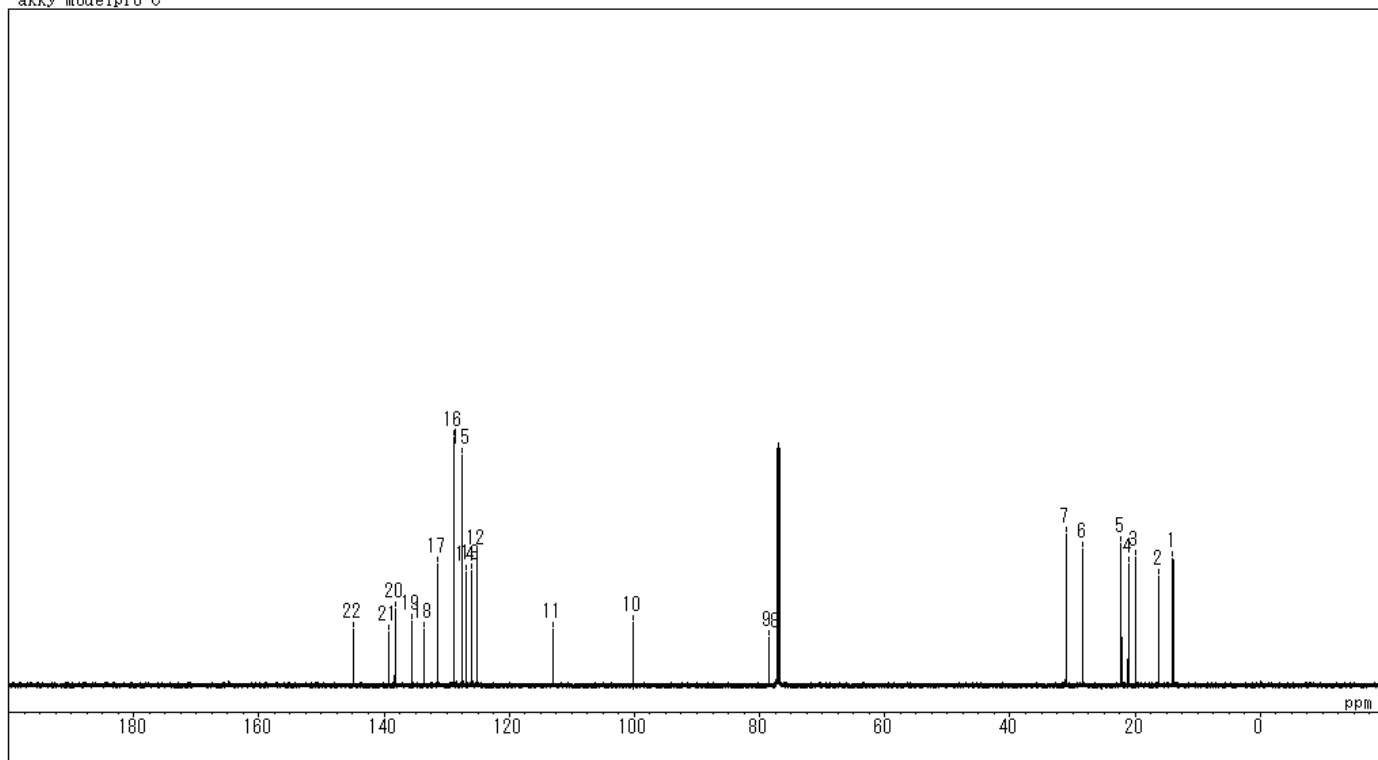

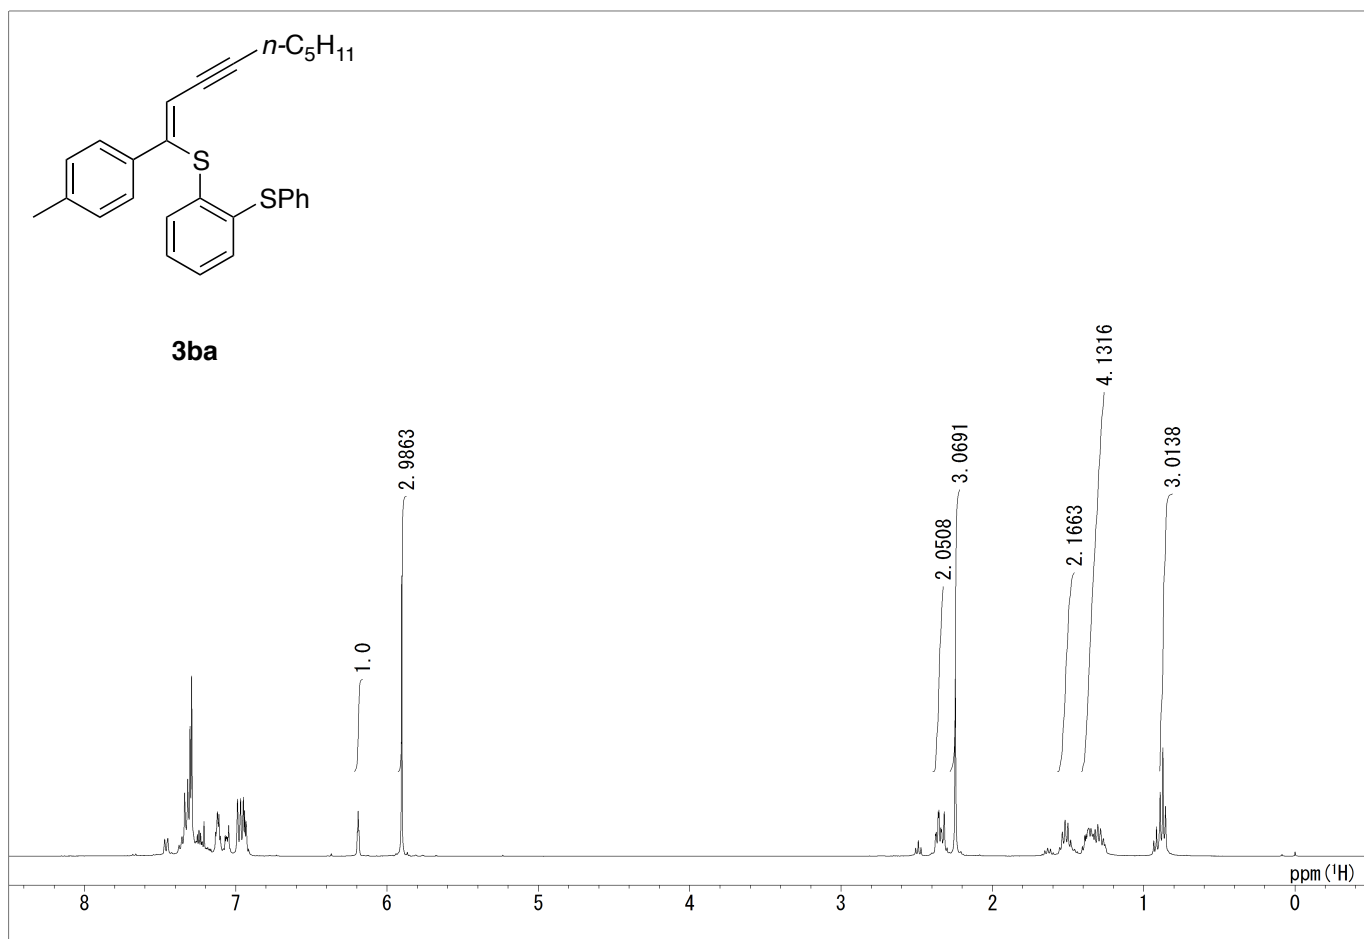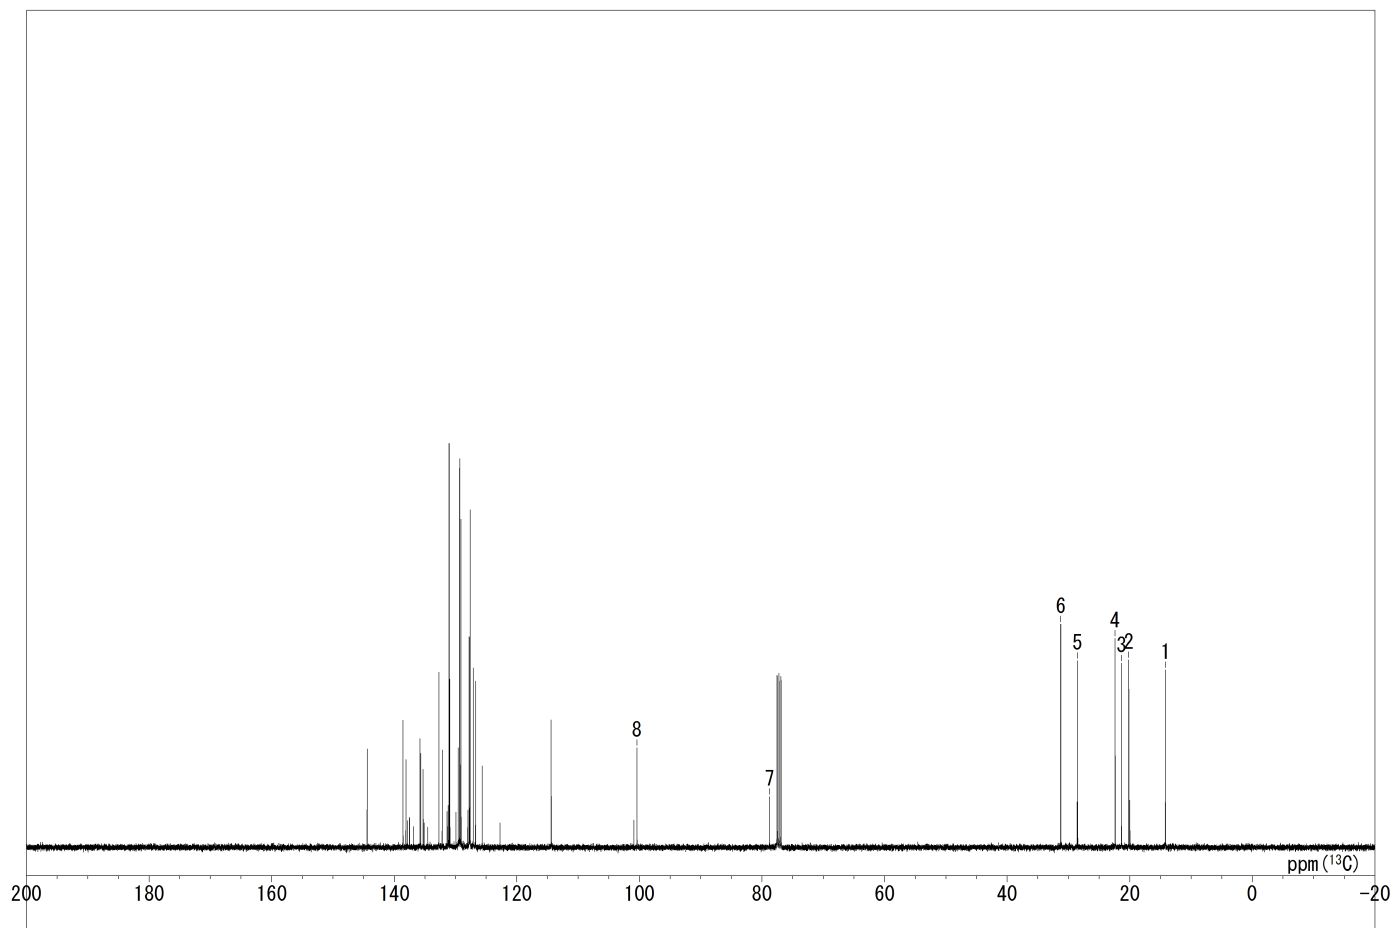

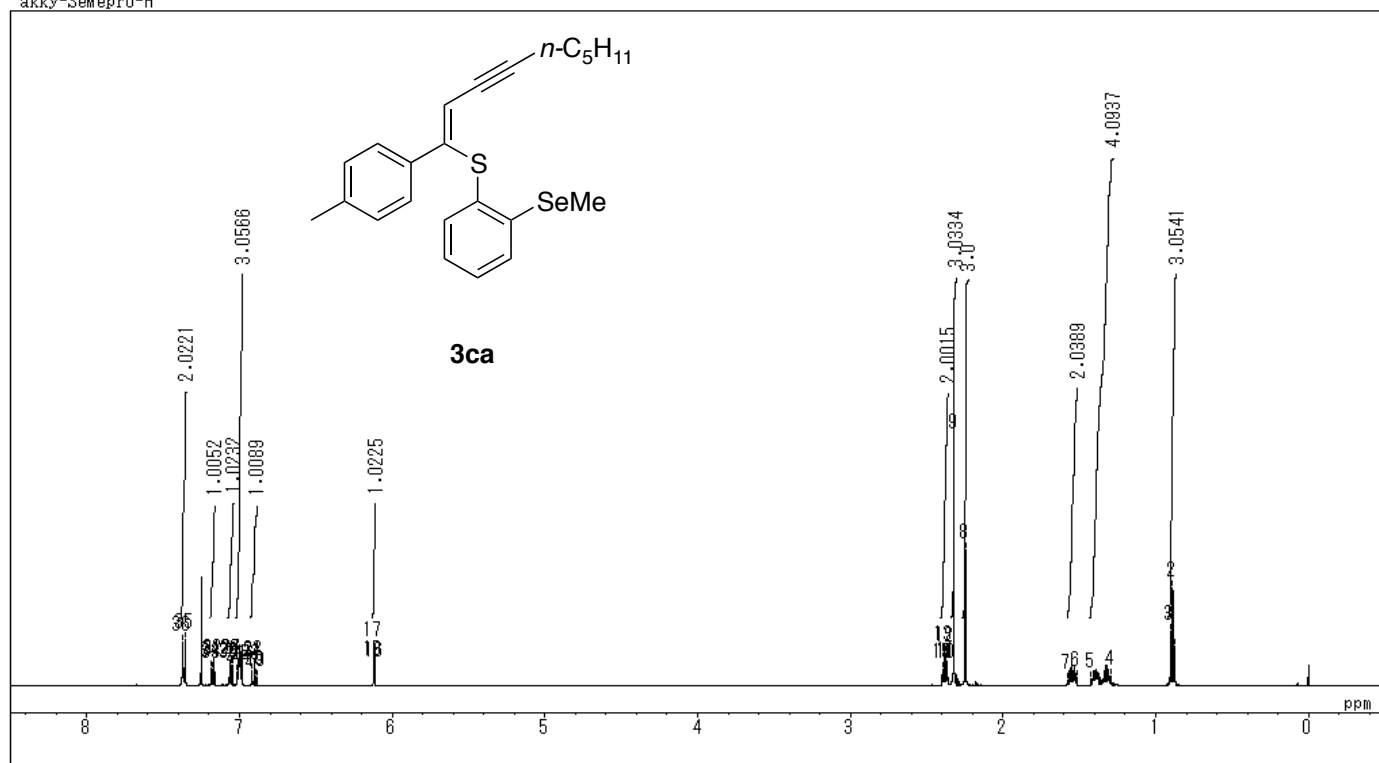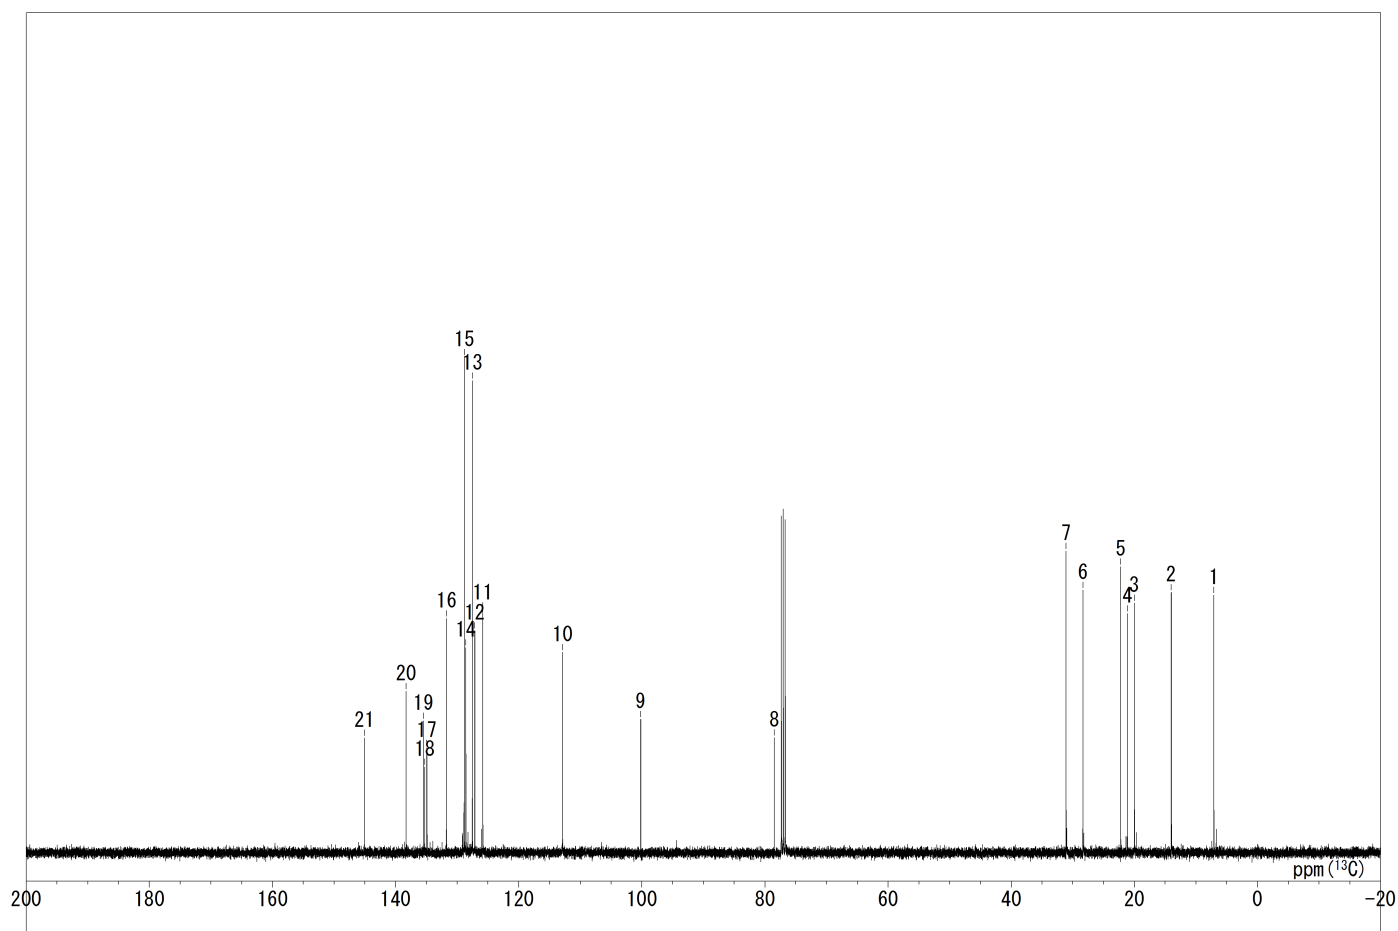

akky-ex195-H

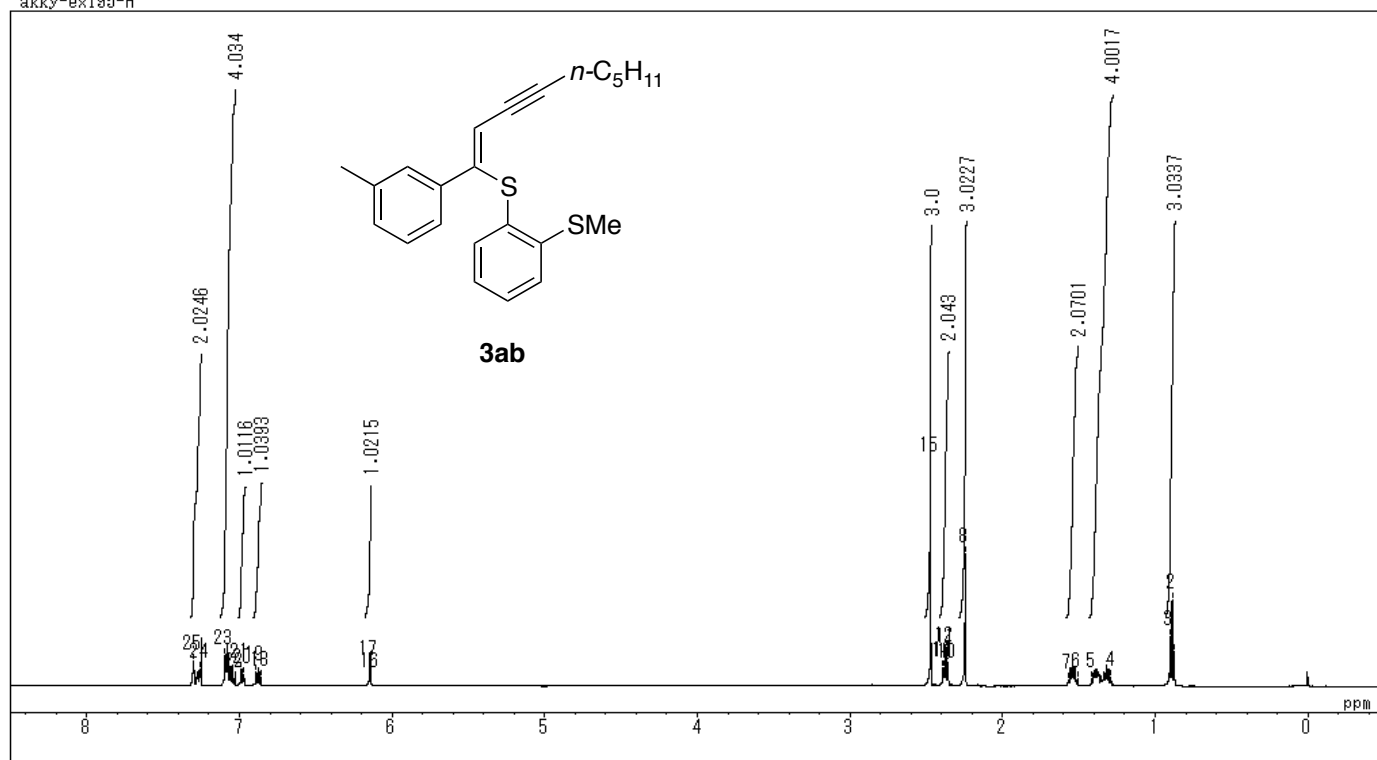

akky-ex195-C

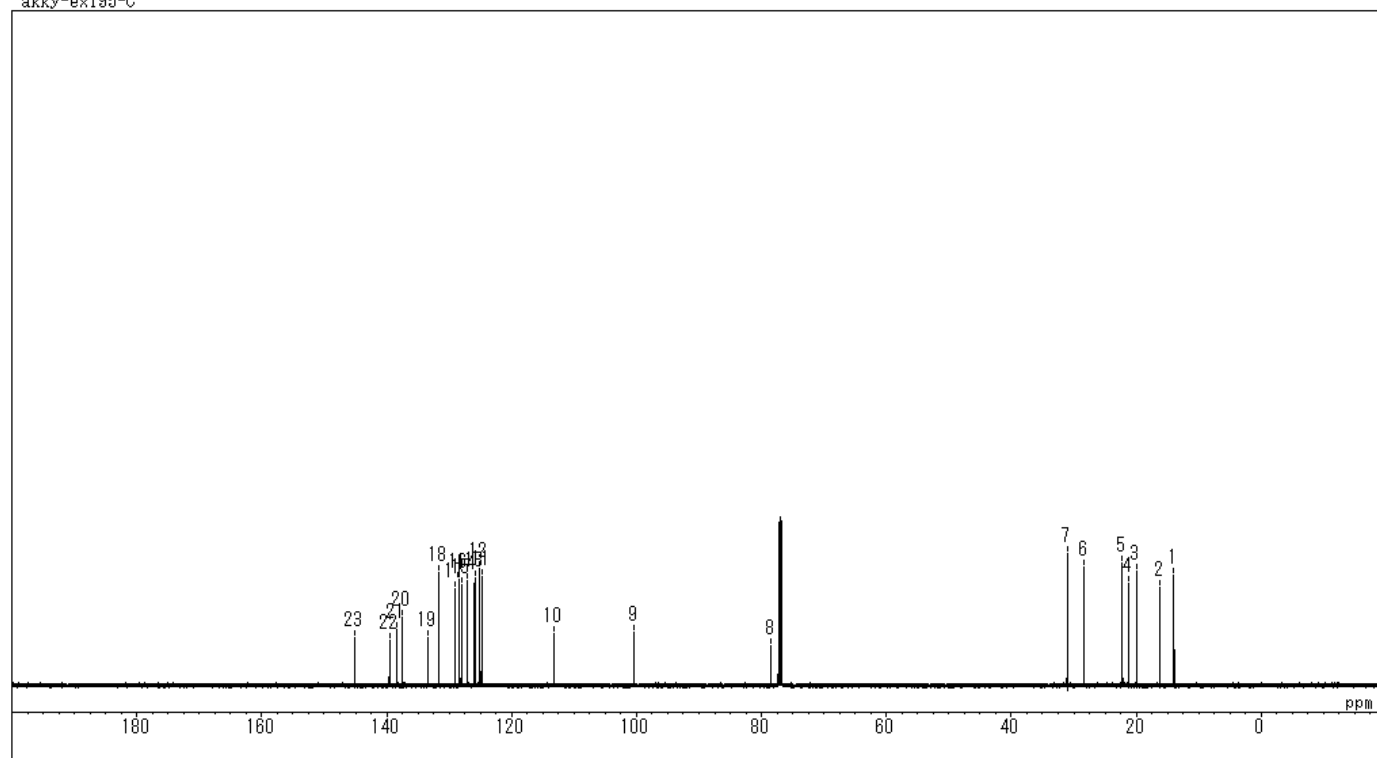

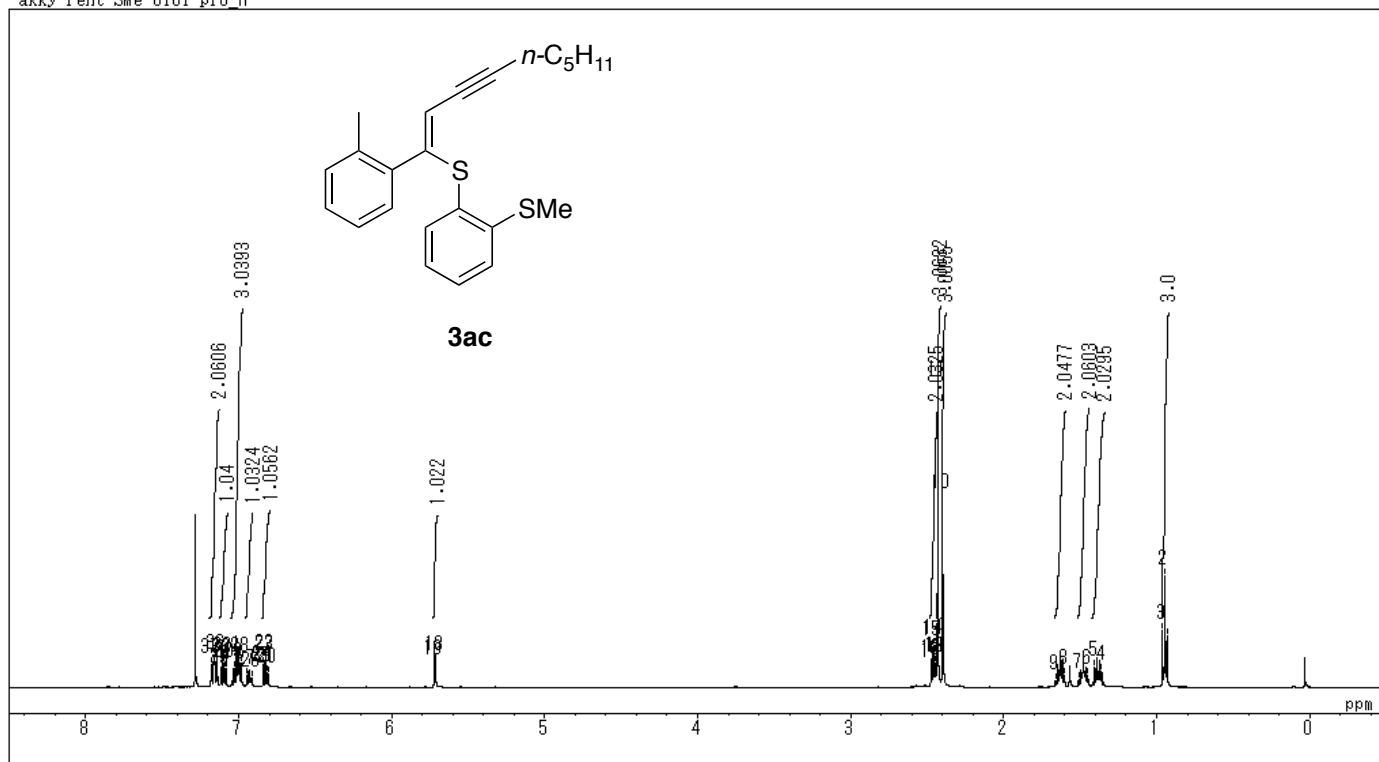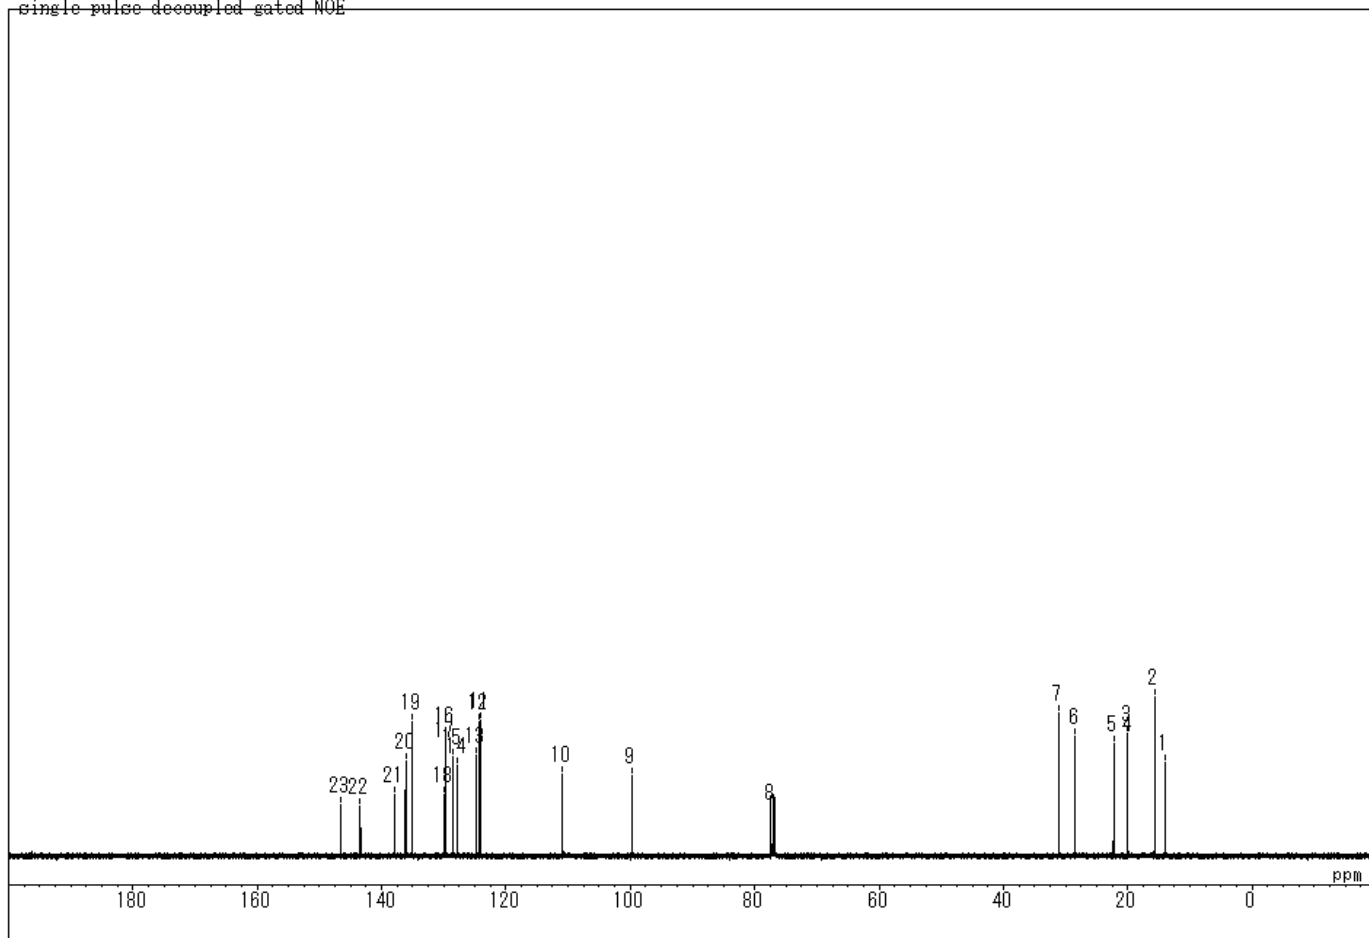

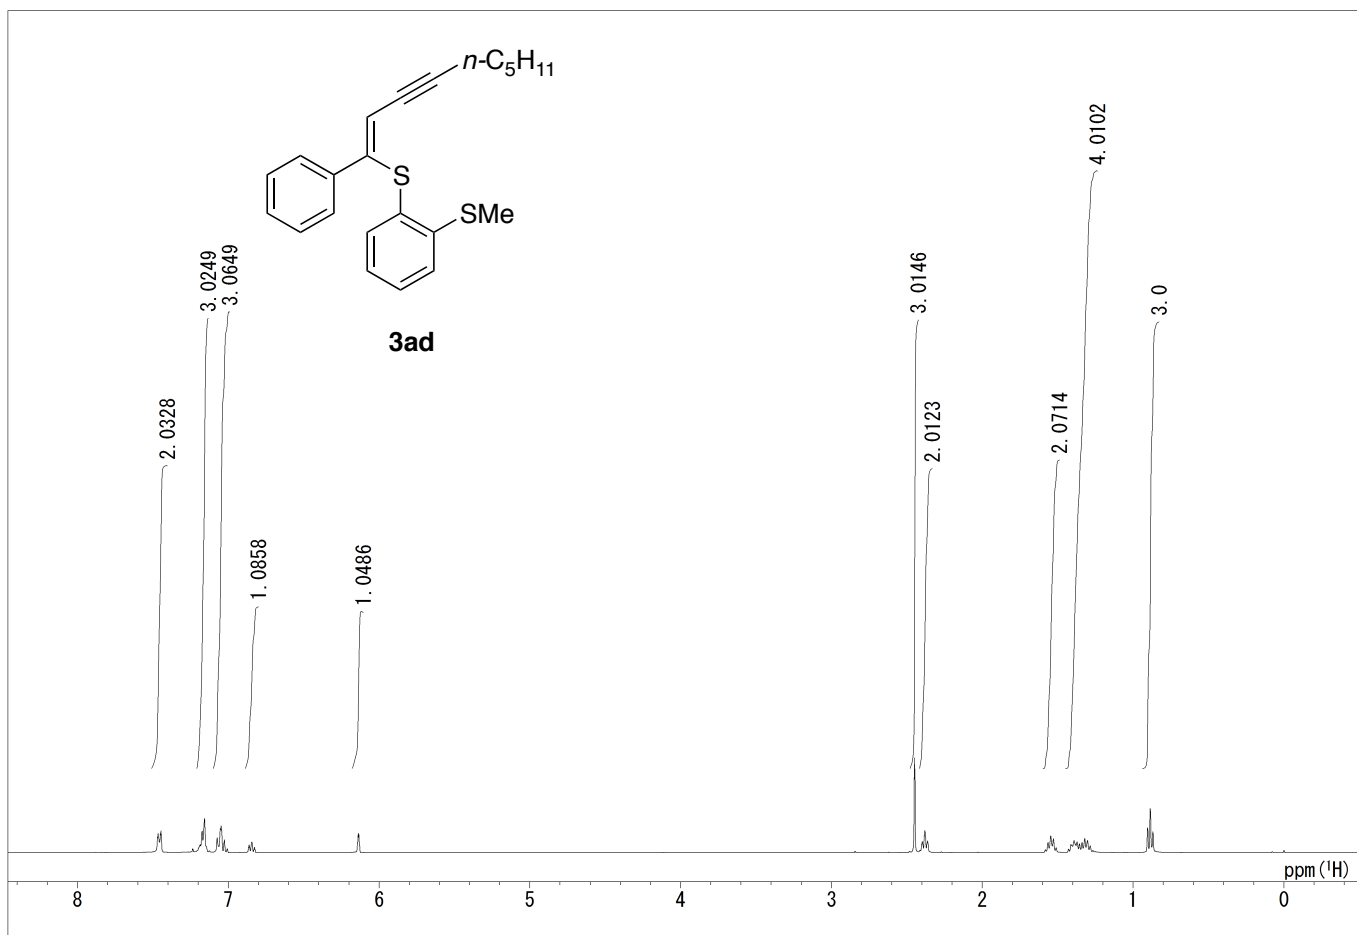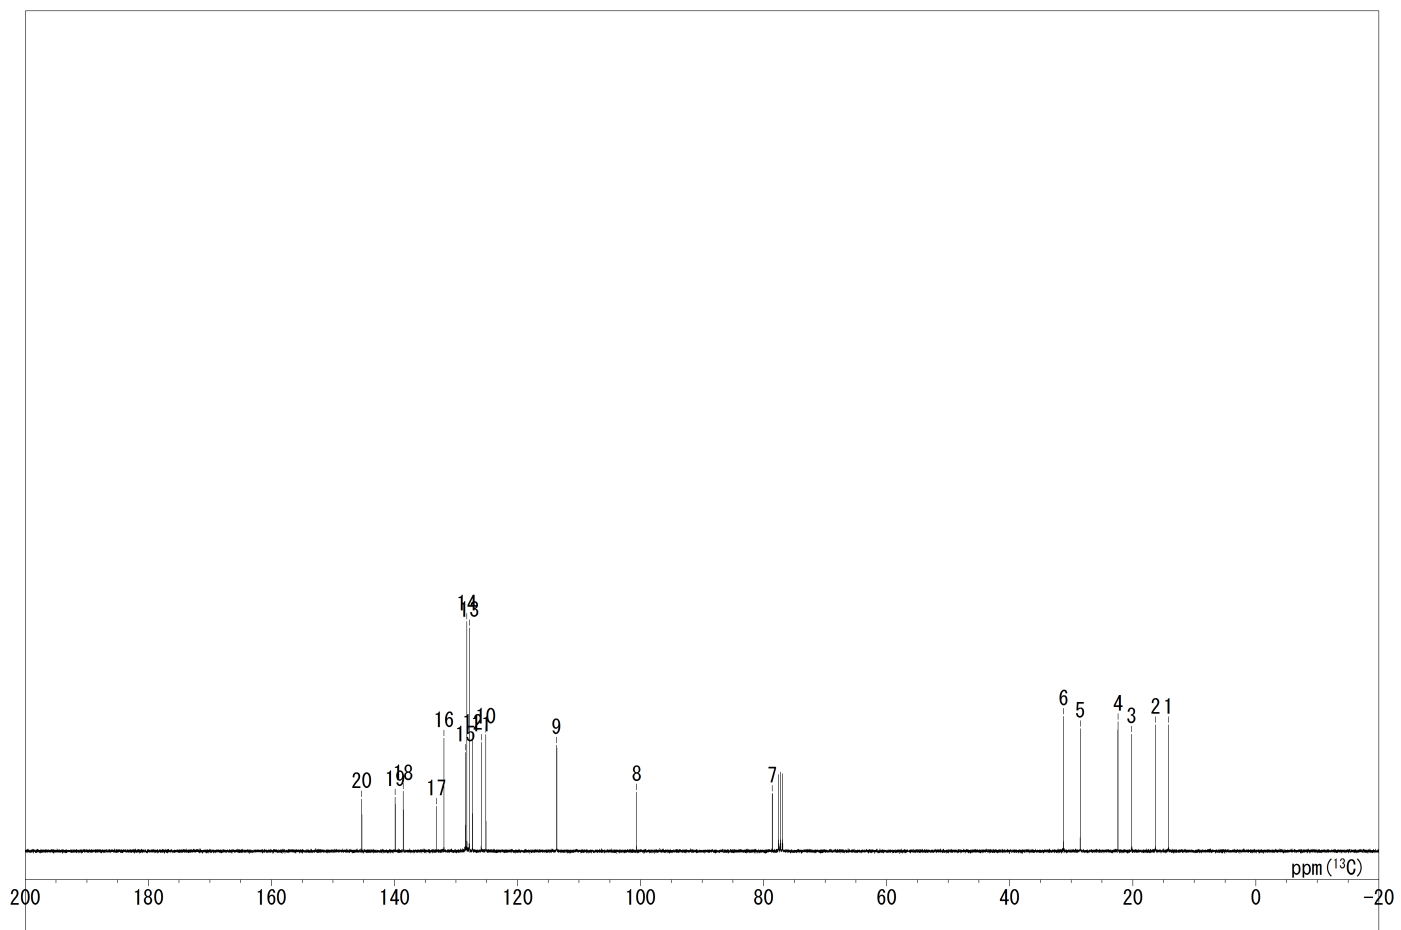

akky-Pent-SMe-nap-pro H

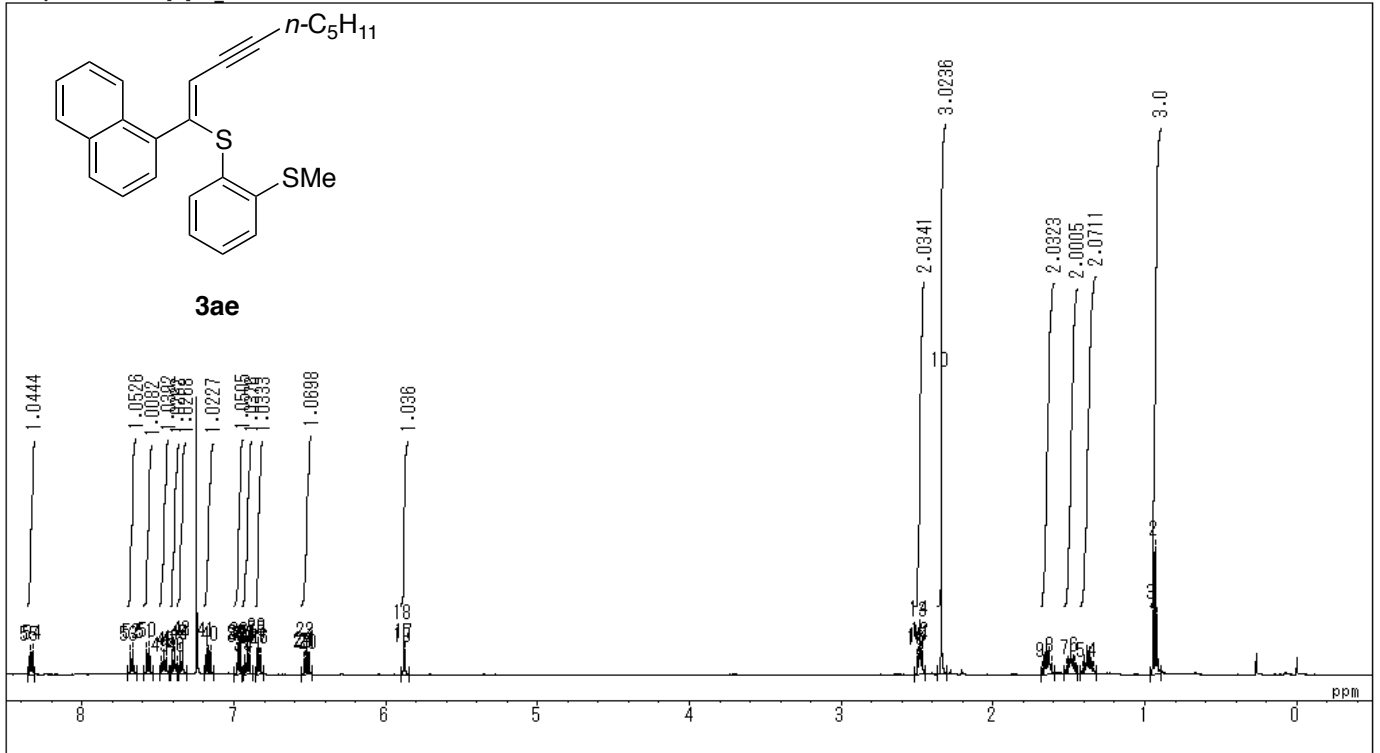

akky-Pent-SMe-nap-pro C

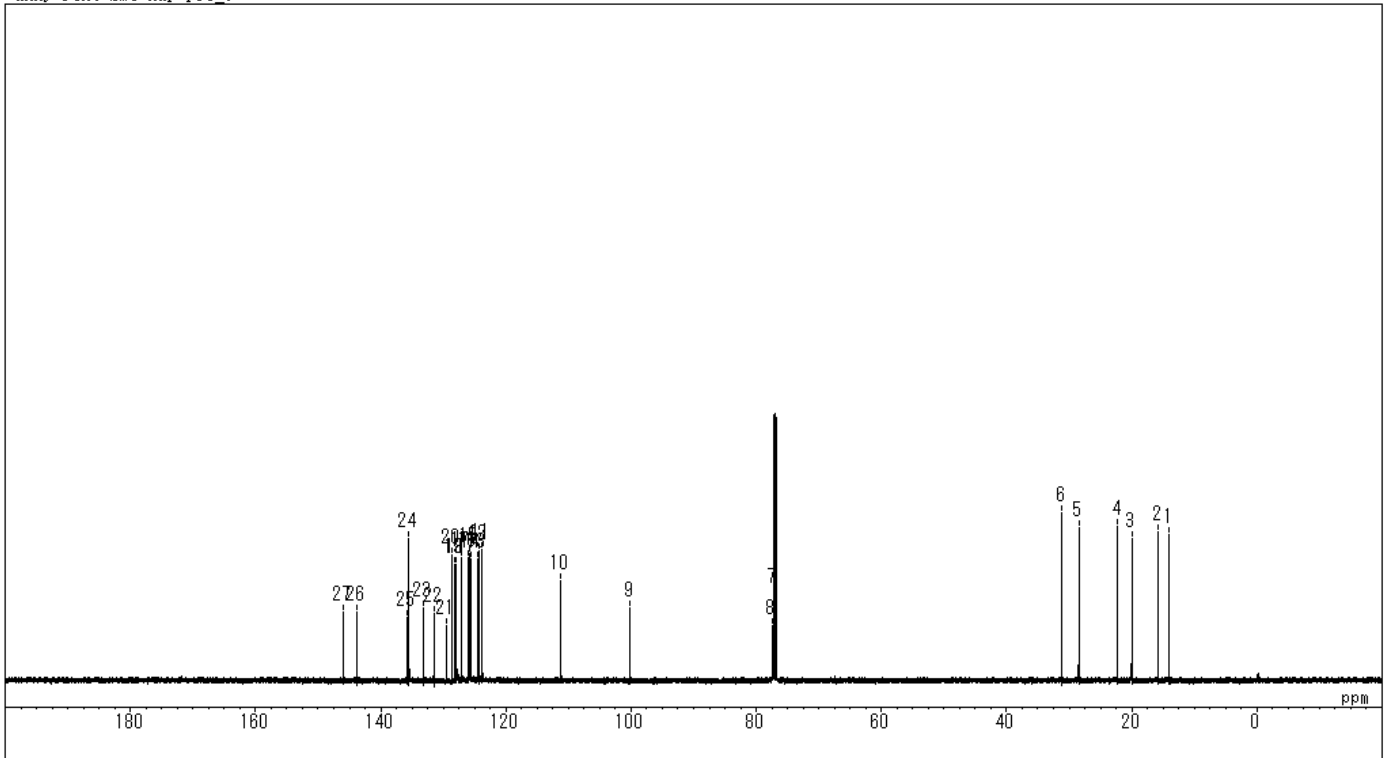

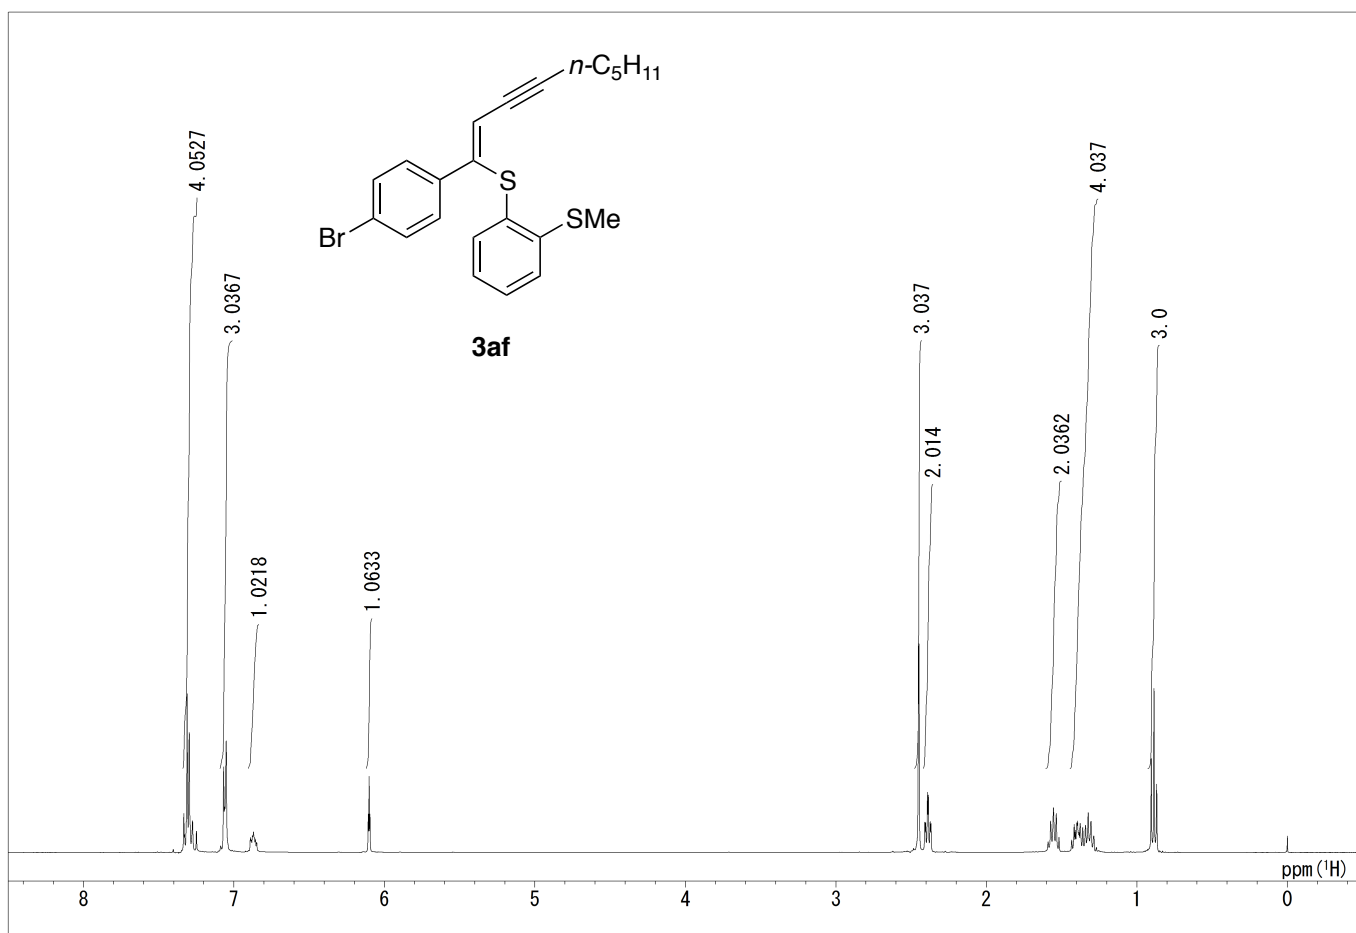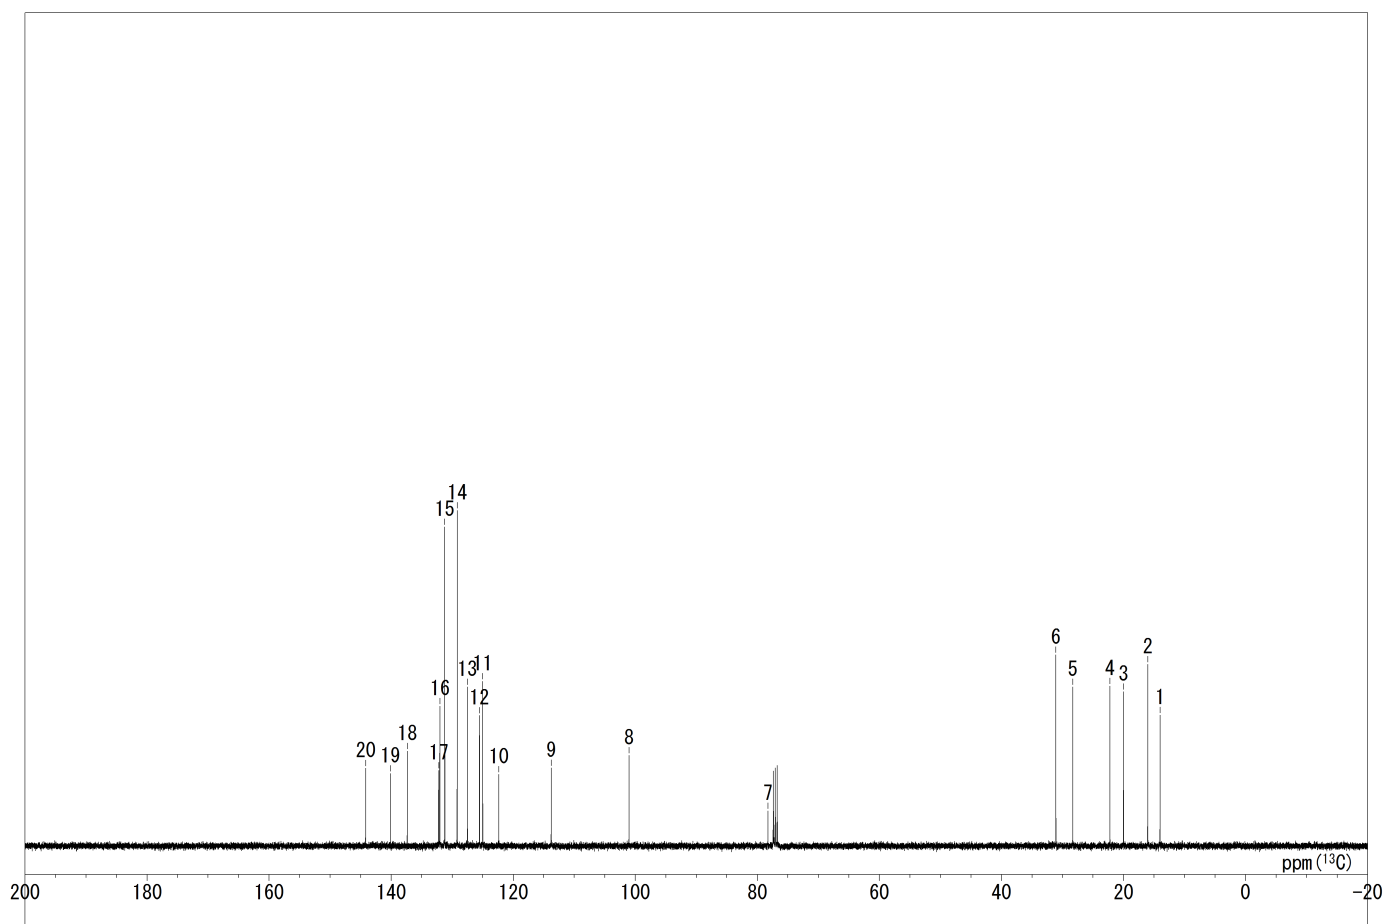



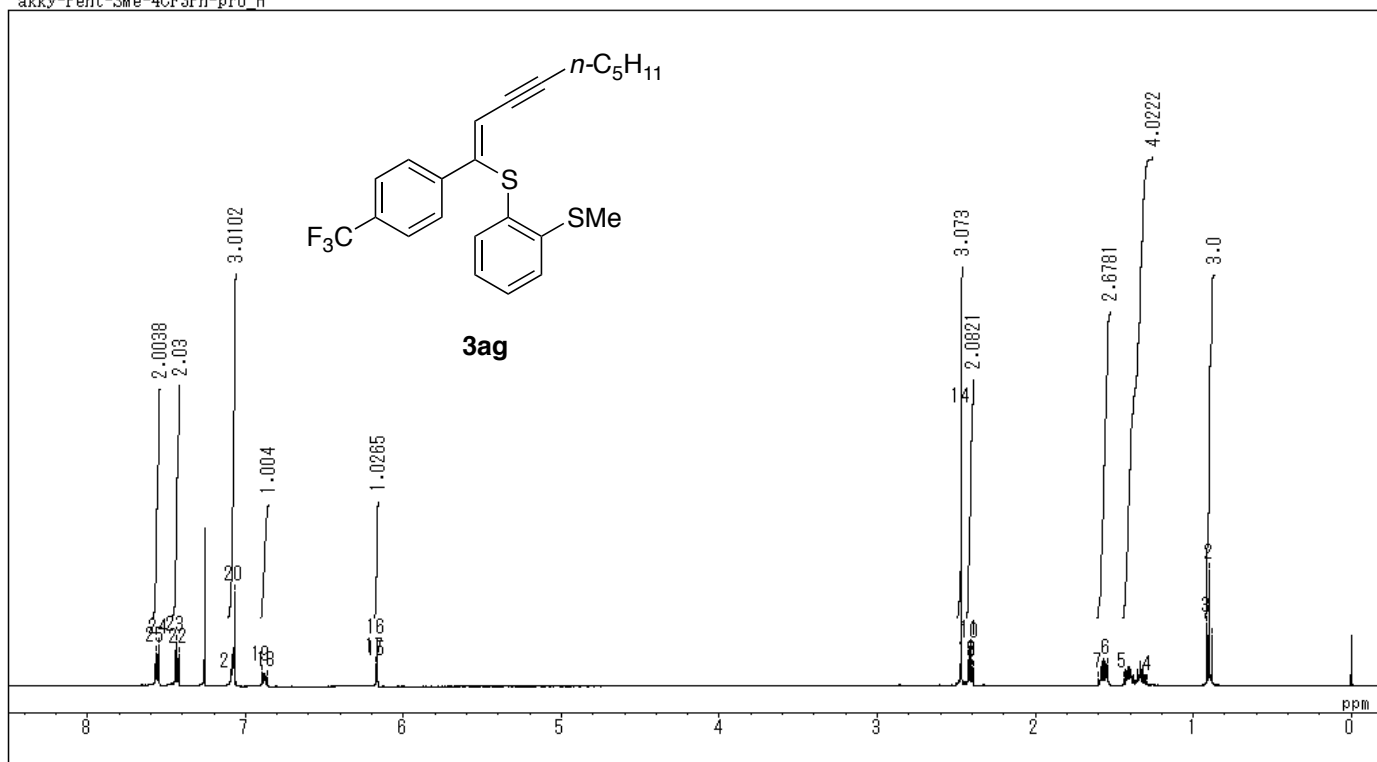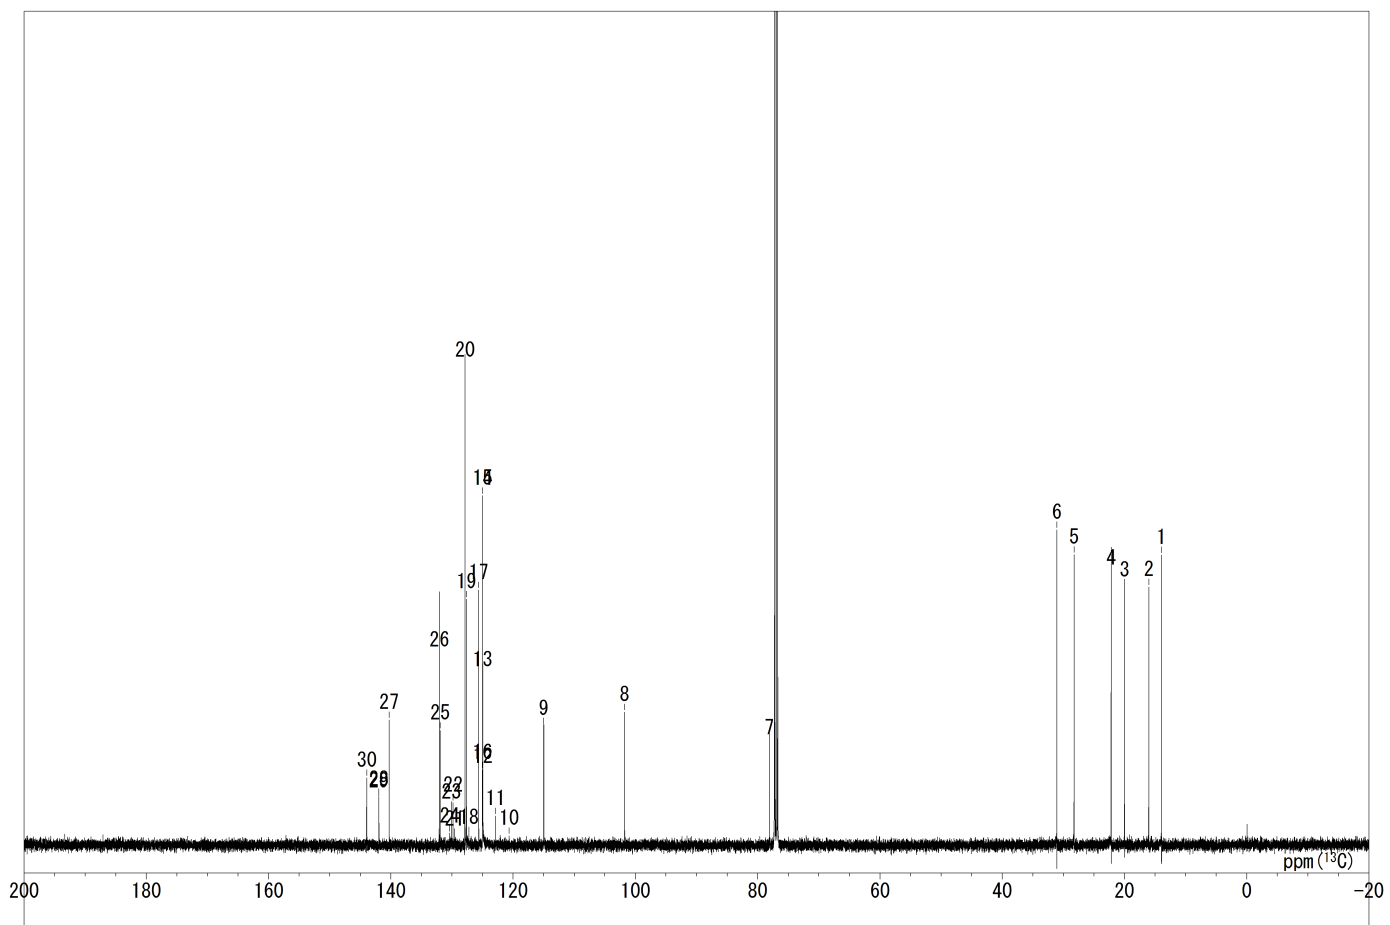

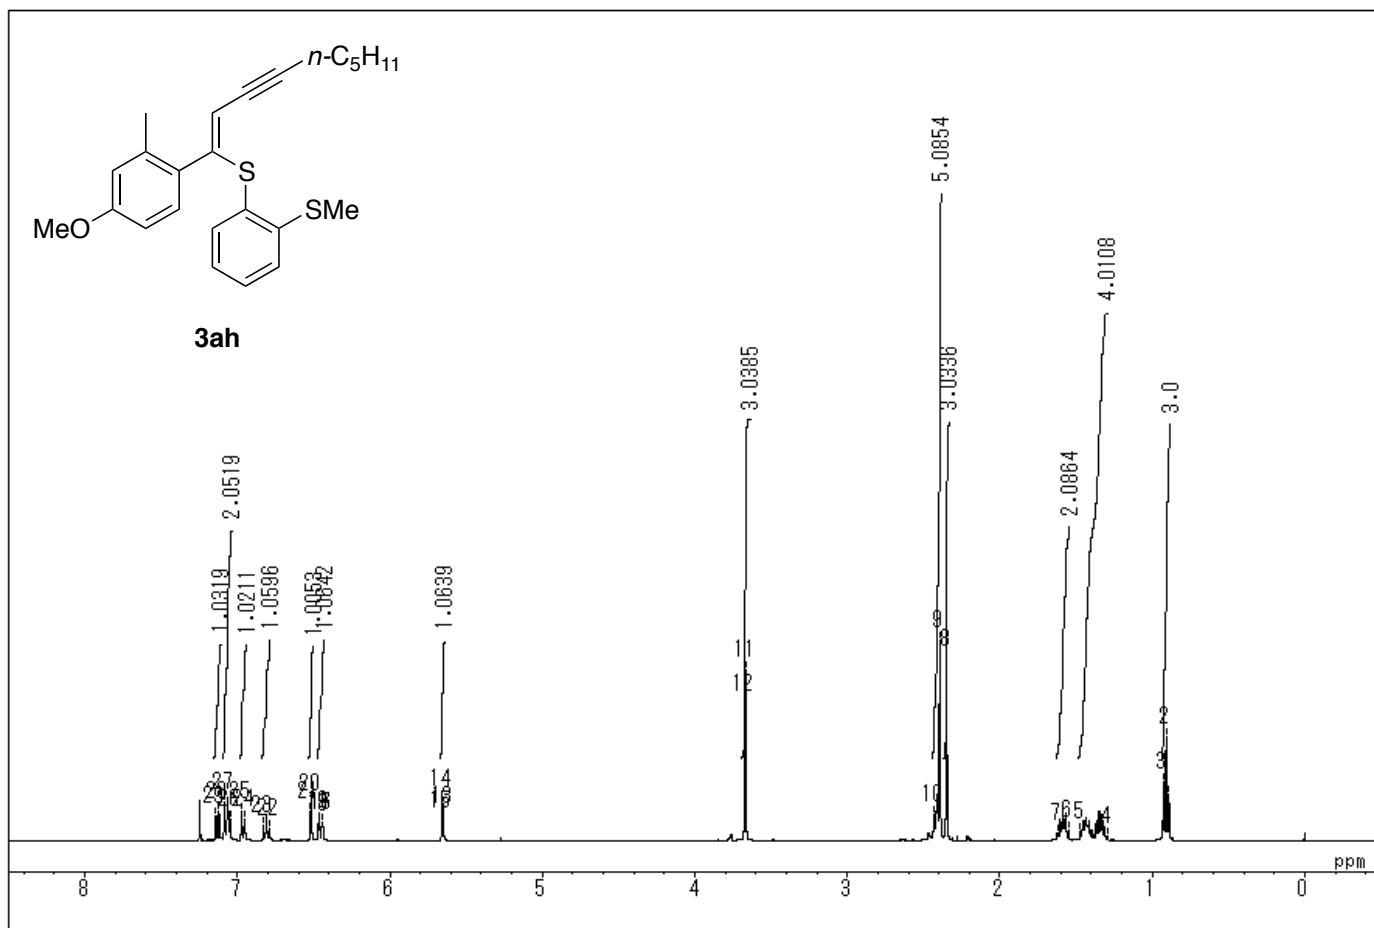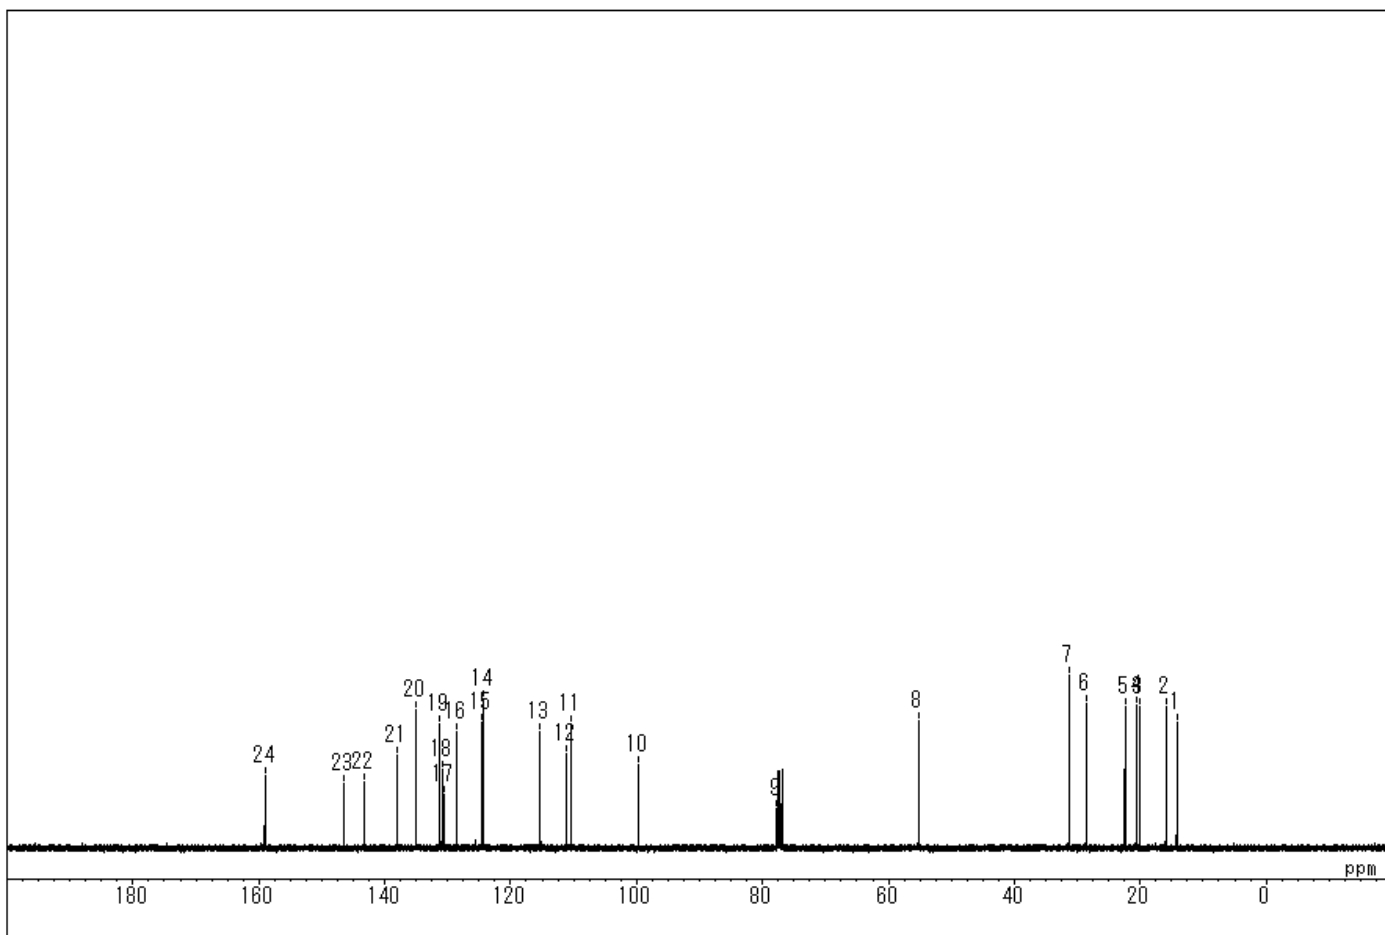

single\_pulse

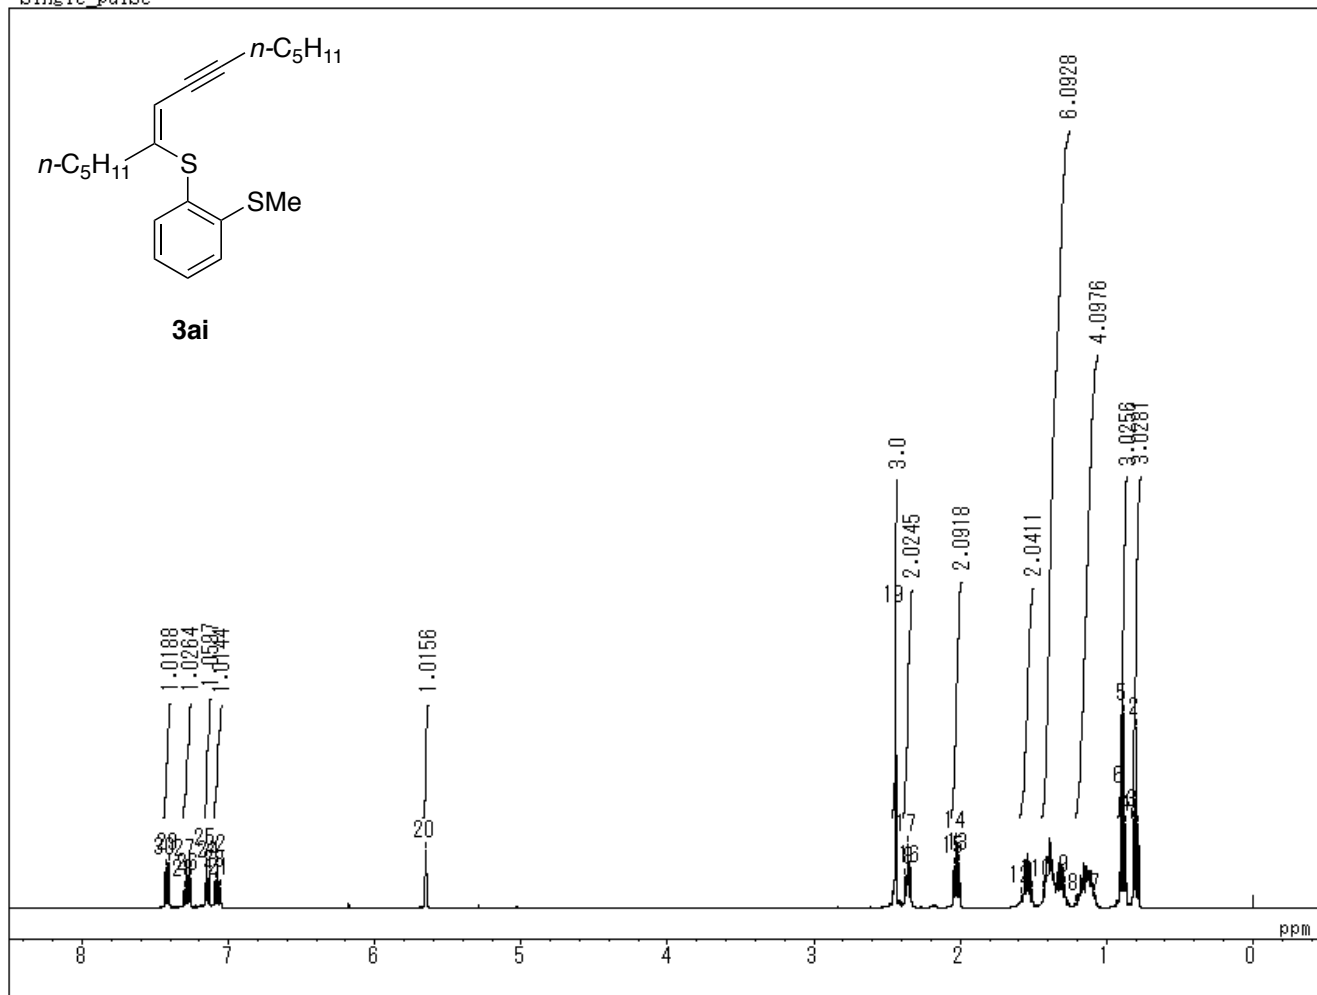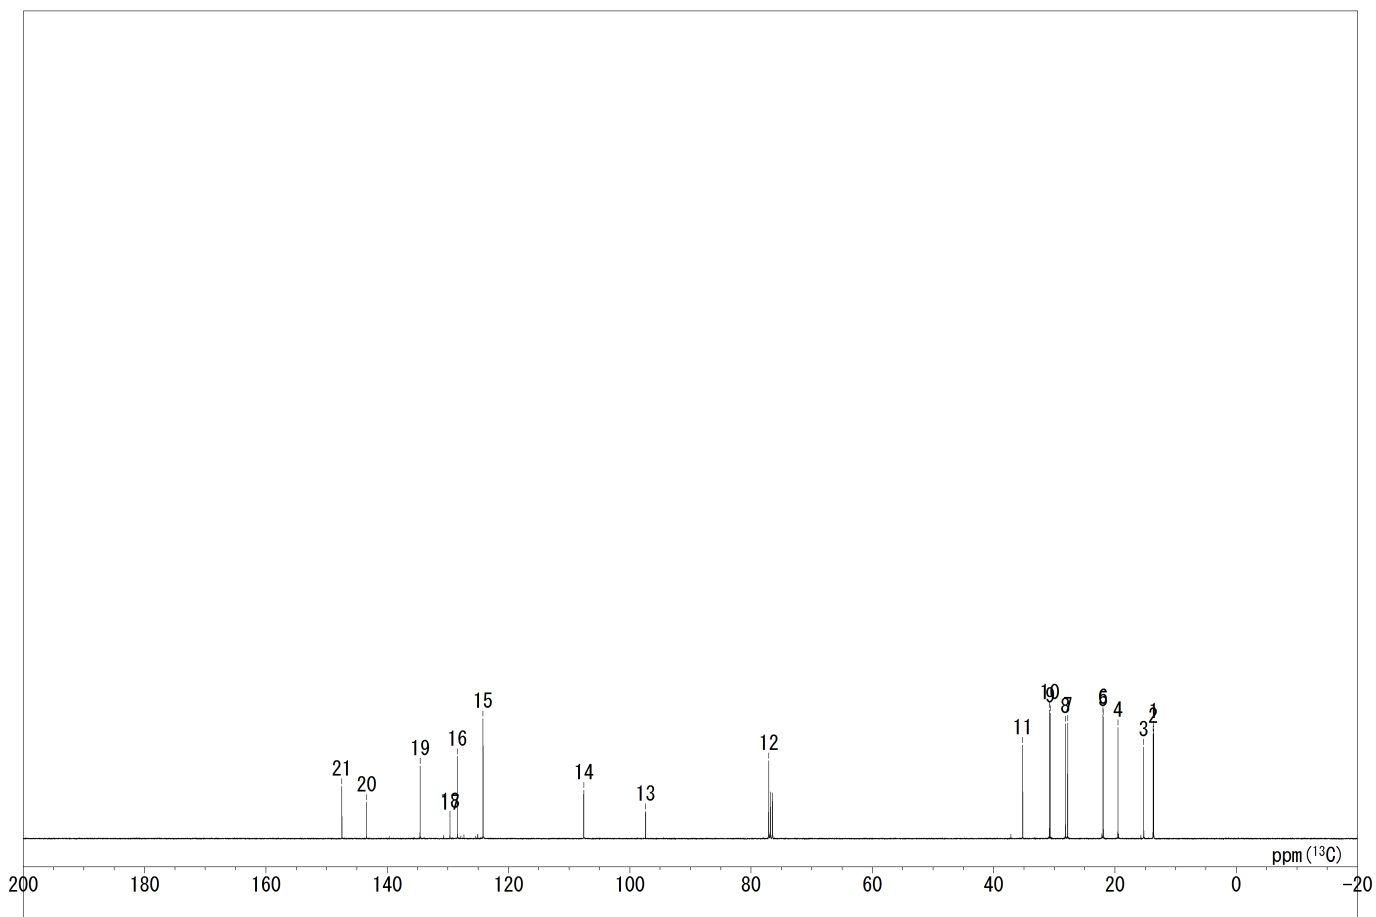

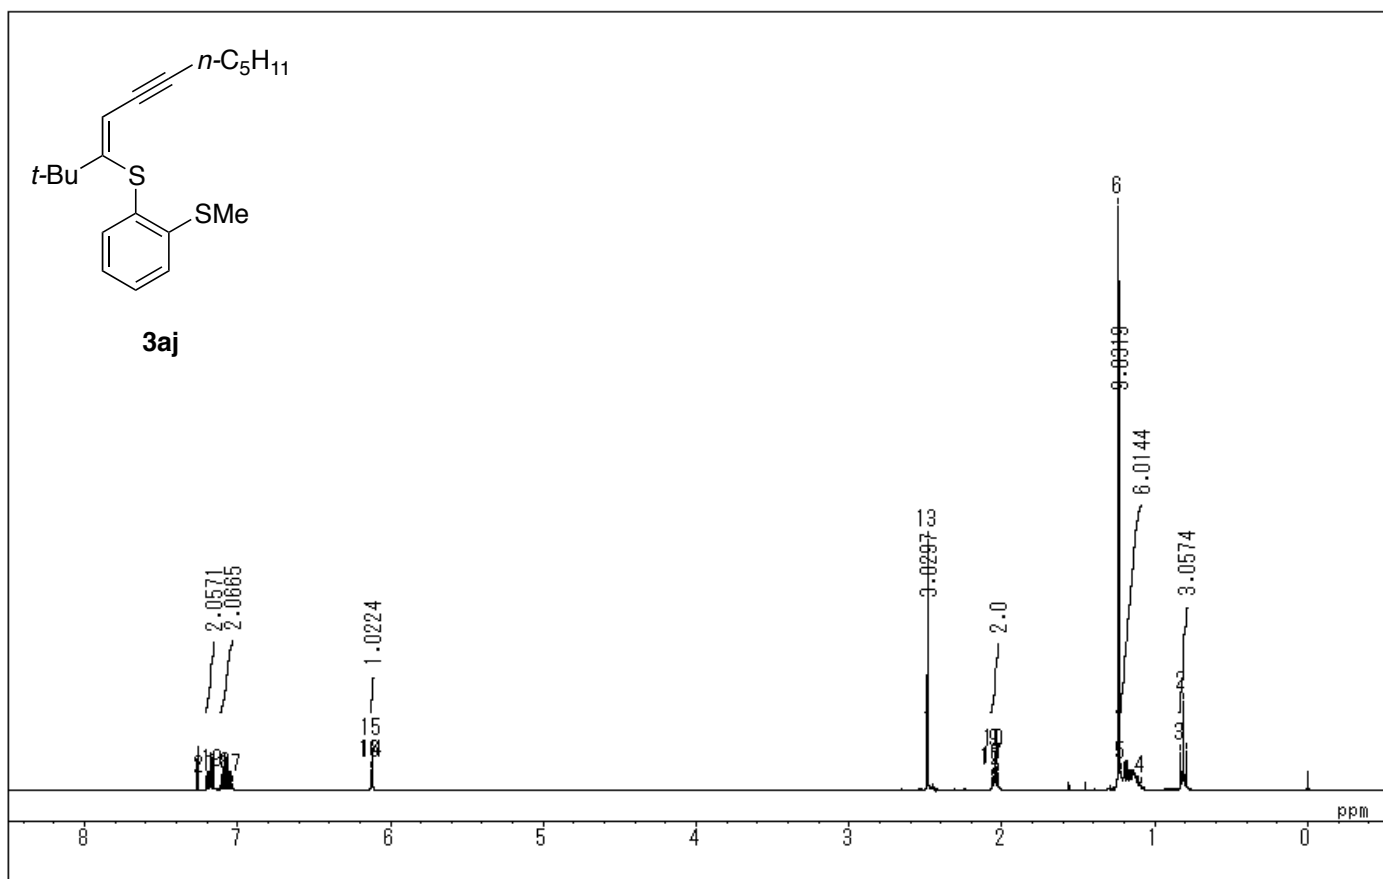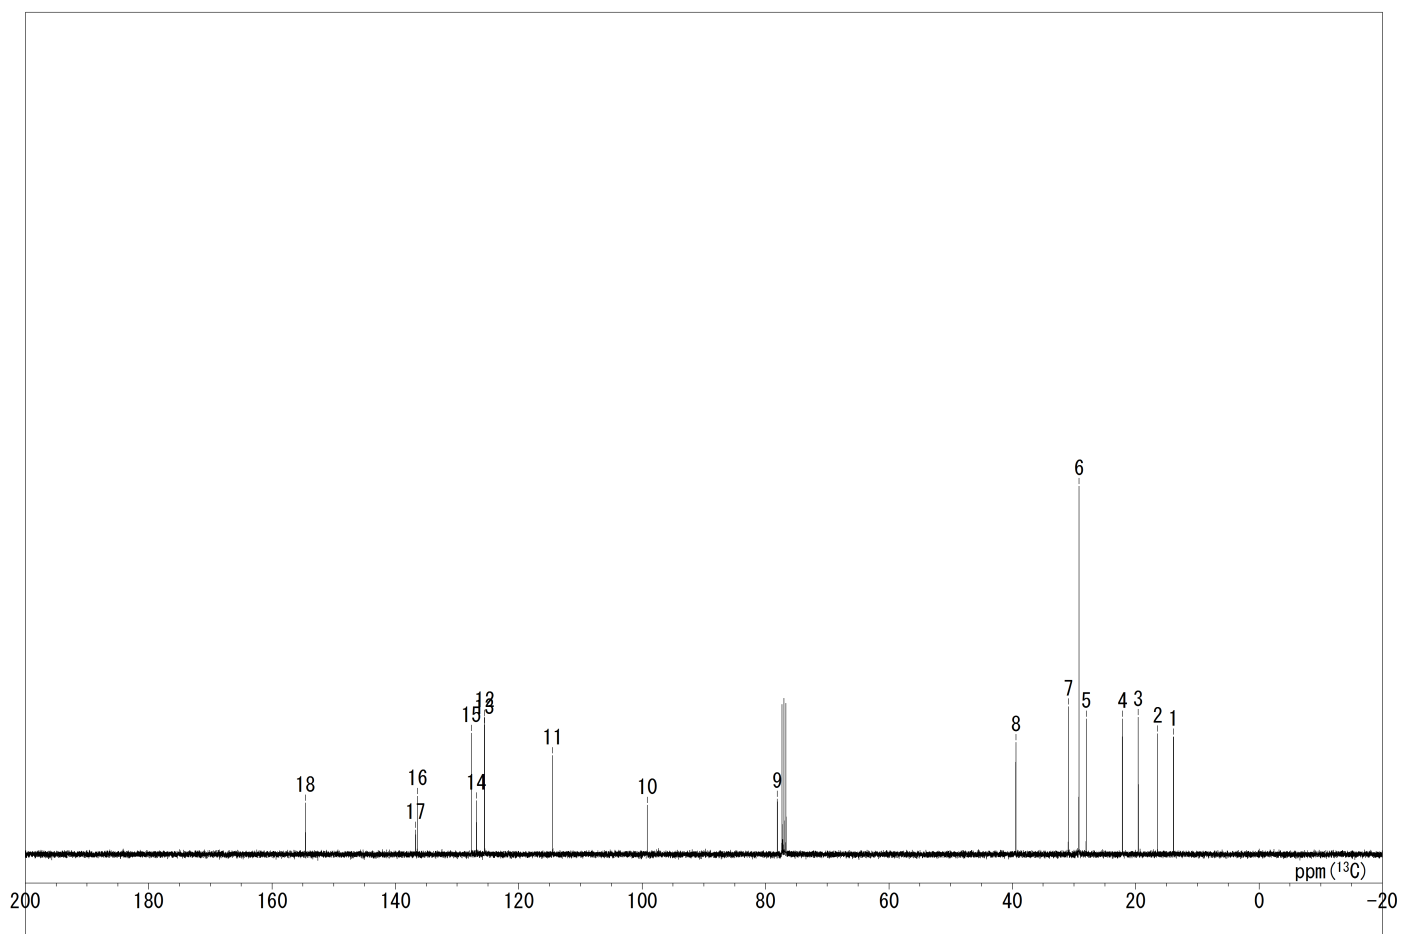

akky-Pent-SMe-TMS-pro-d0516

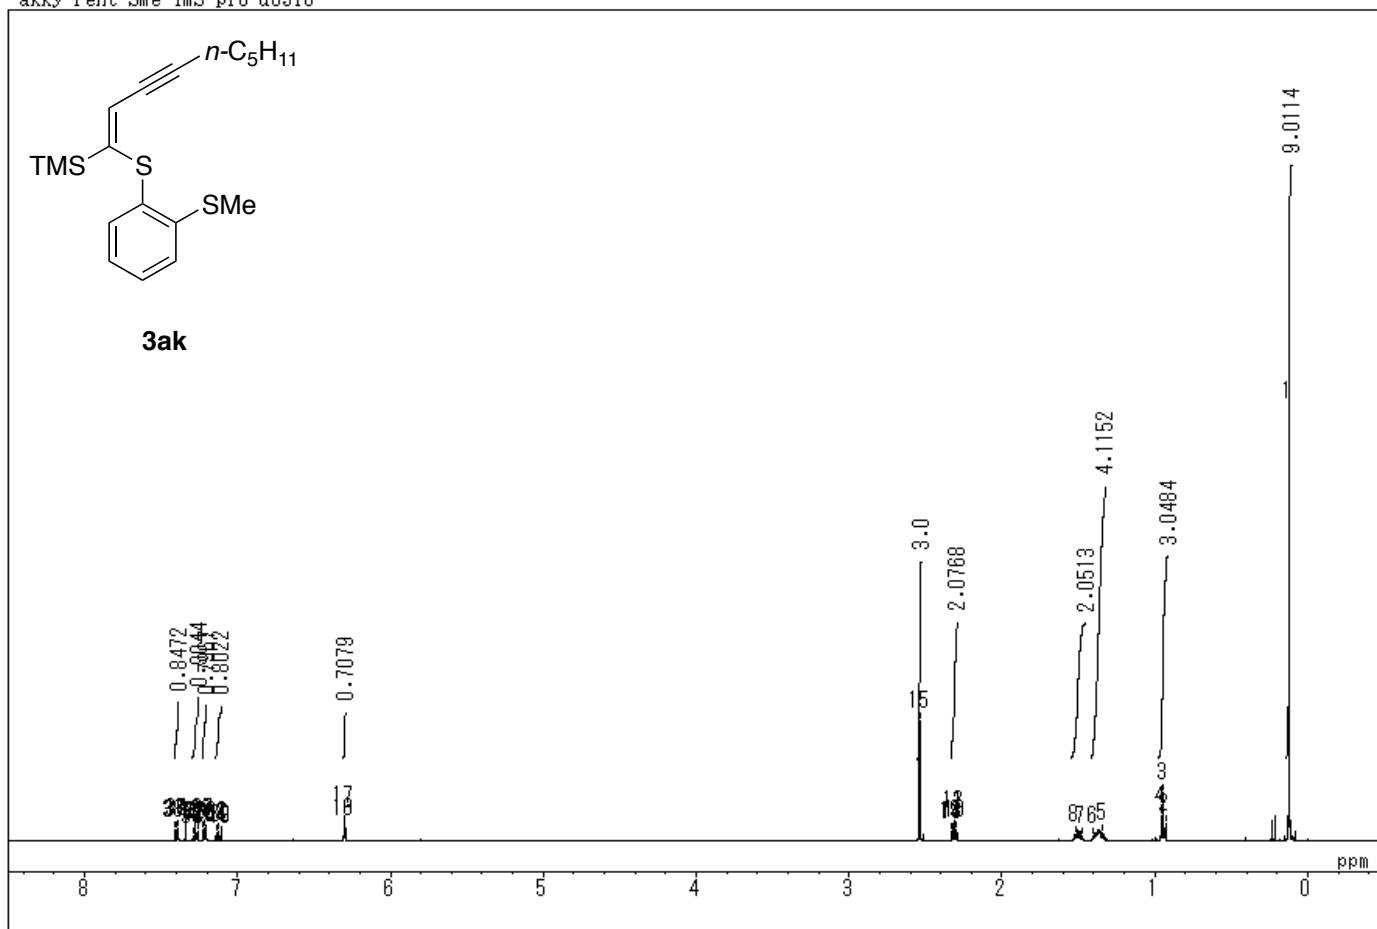

S#845214

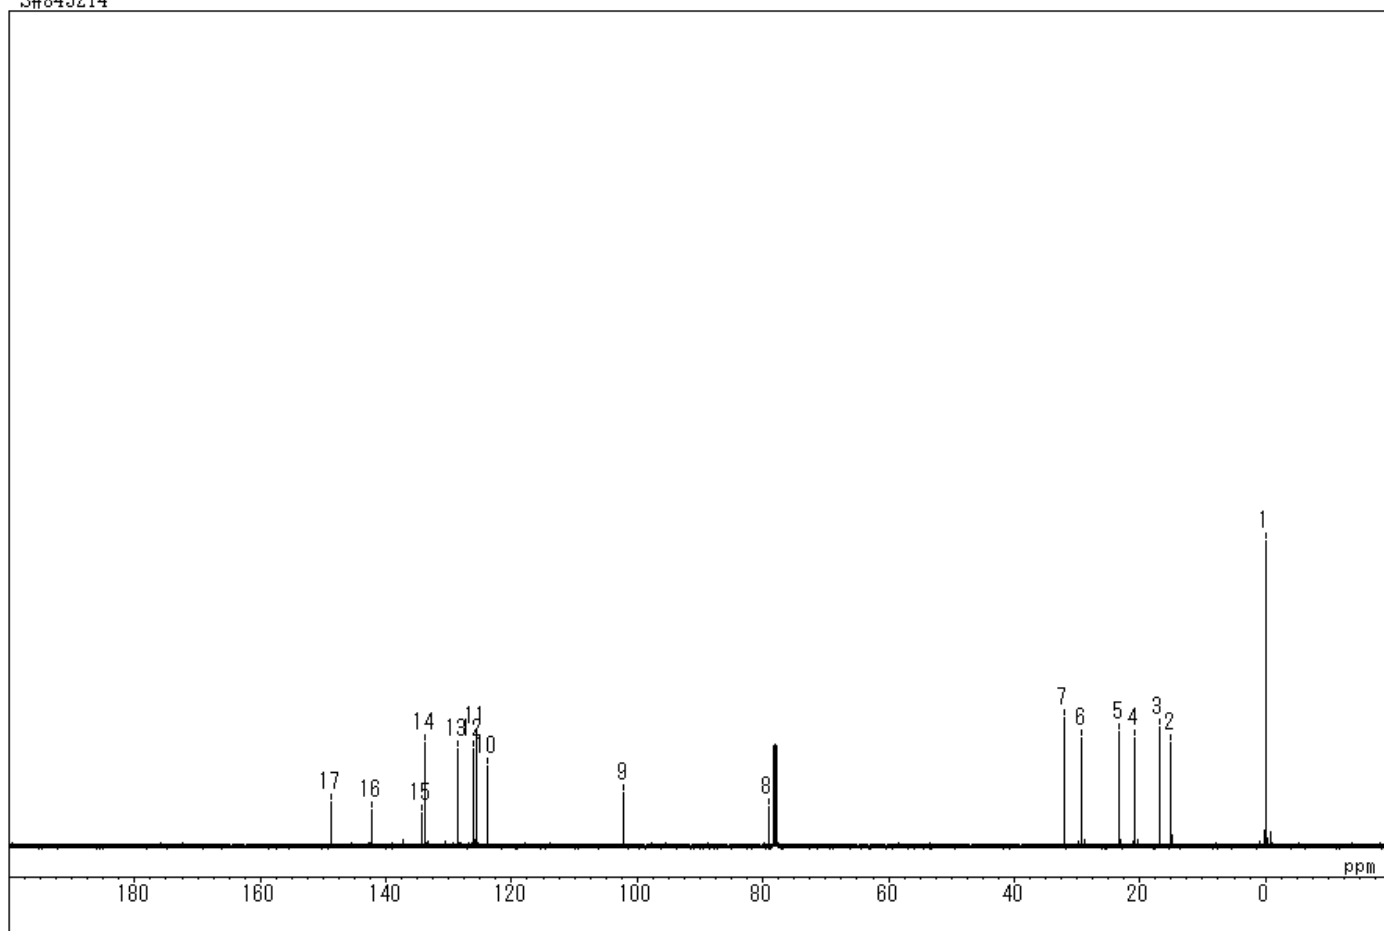

single\_pulse

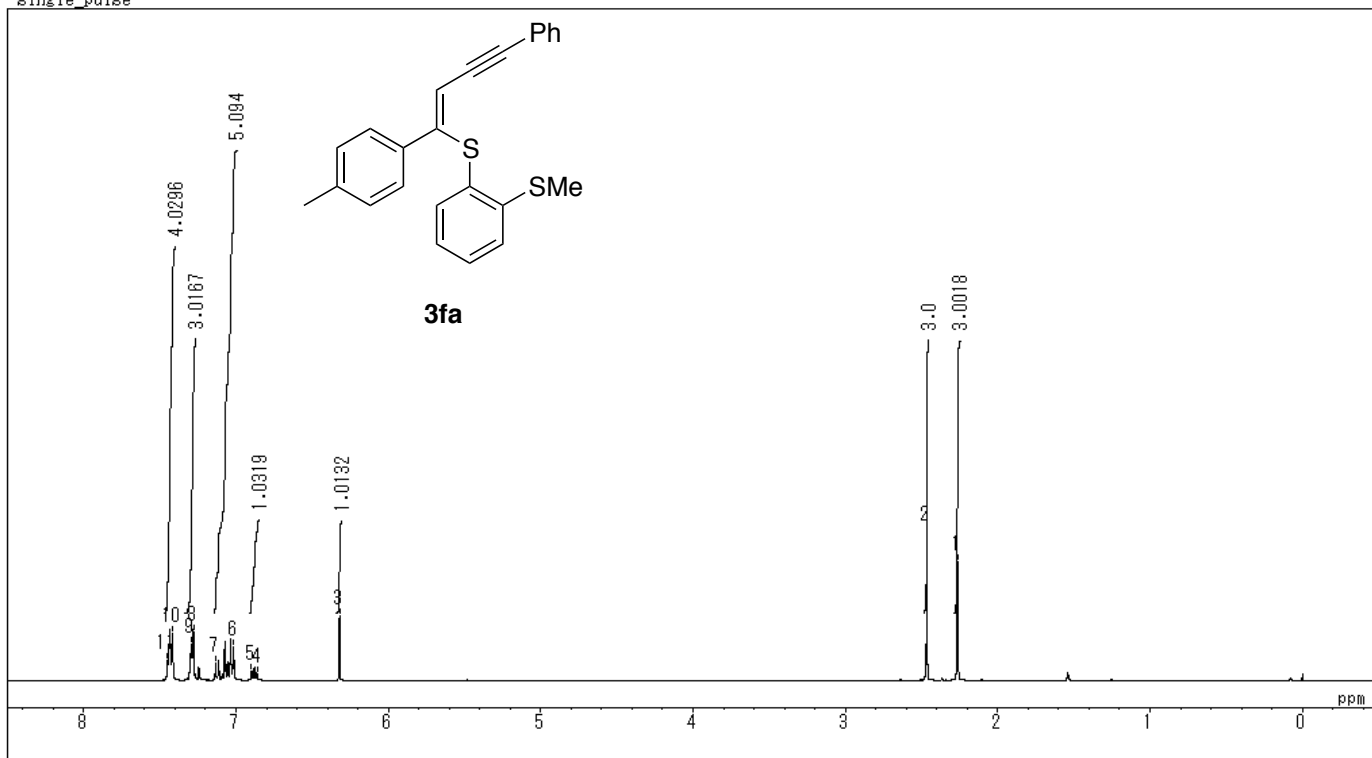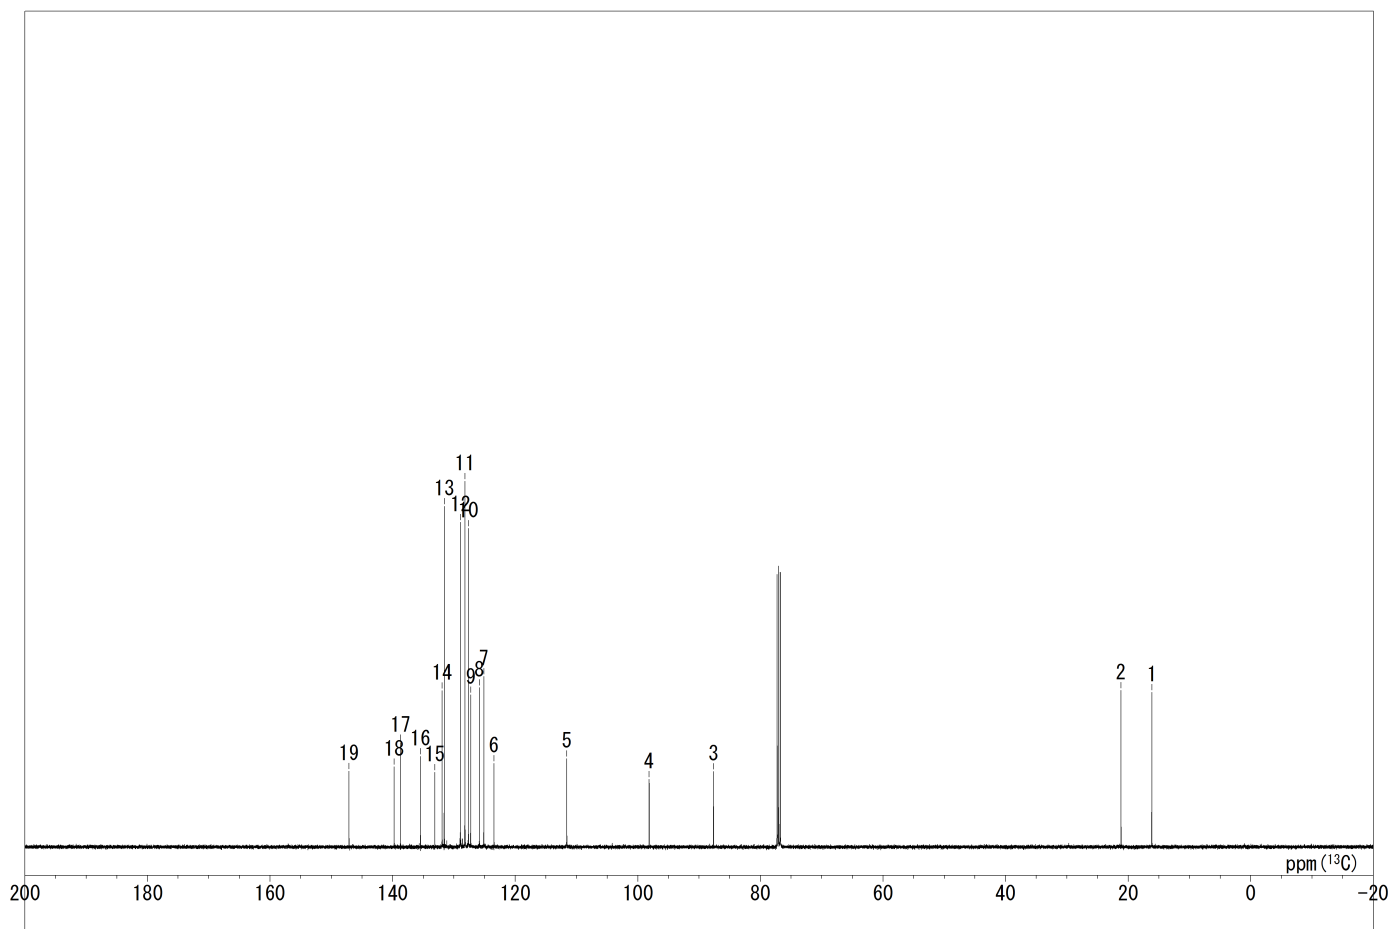

akky-TMS-SMe-pTol-pro\_H

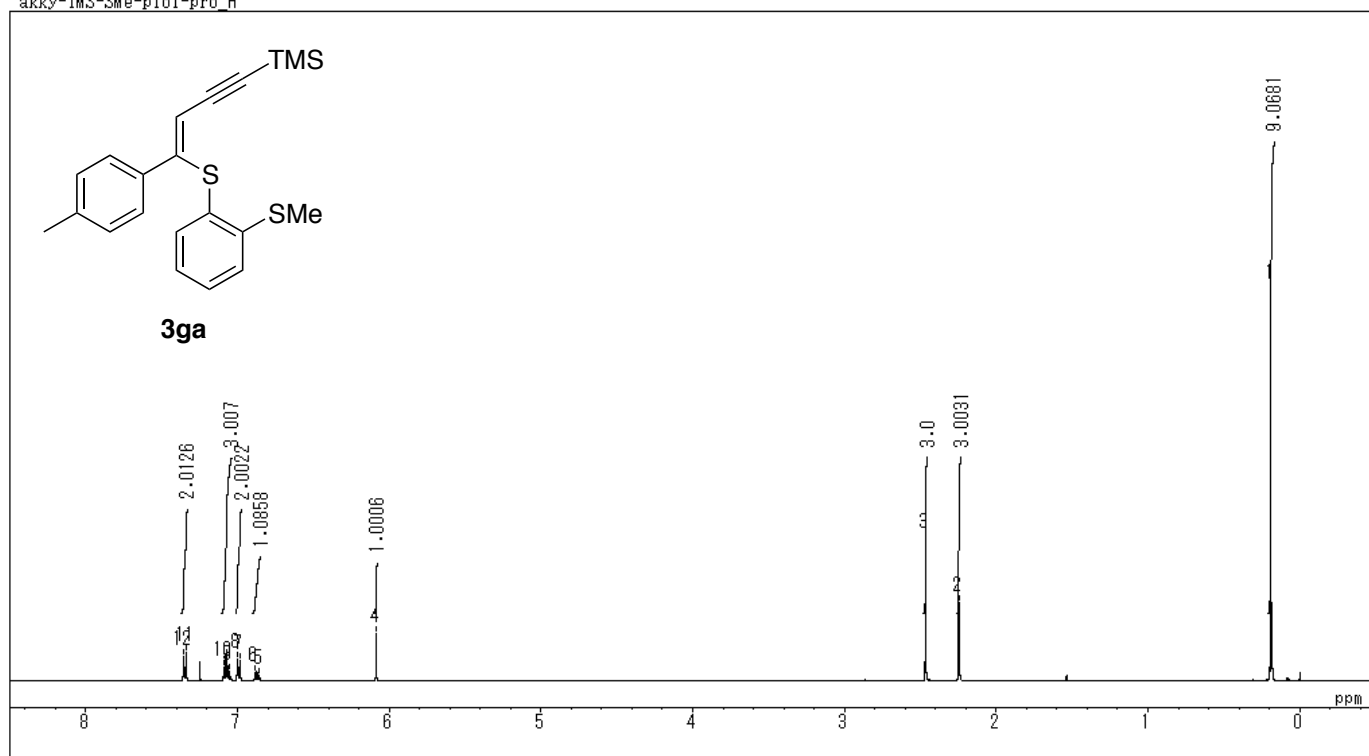

akky-TMS-SMe-pTol-pro\_C

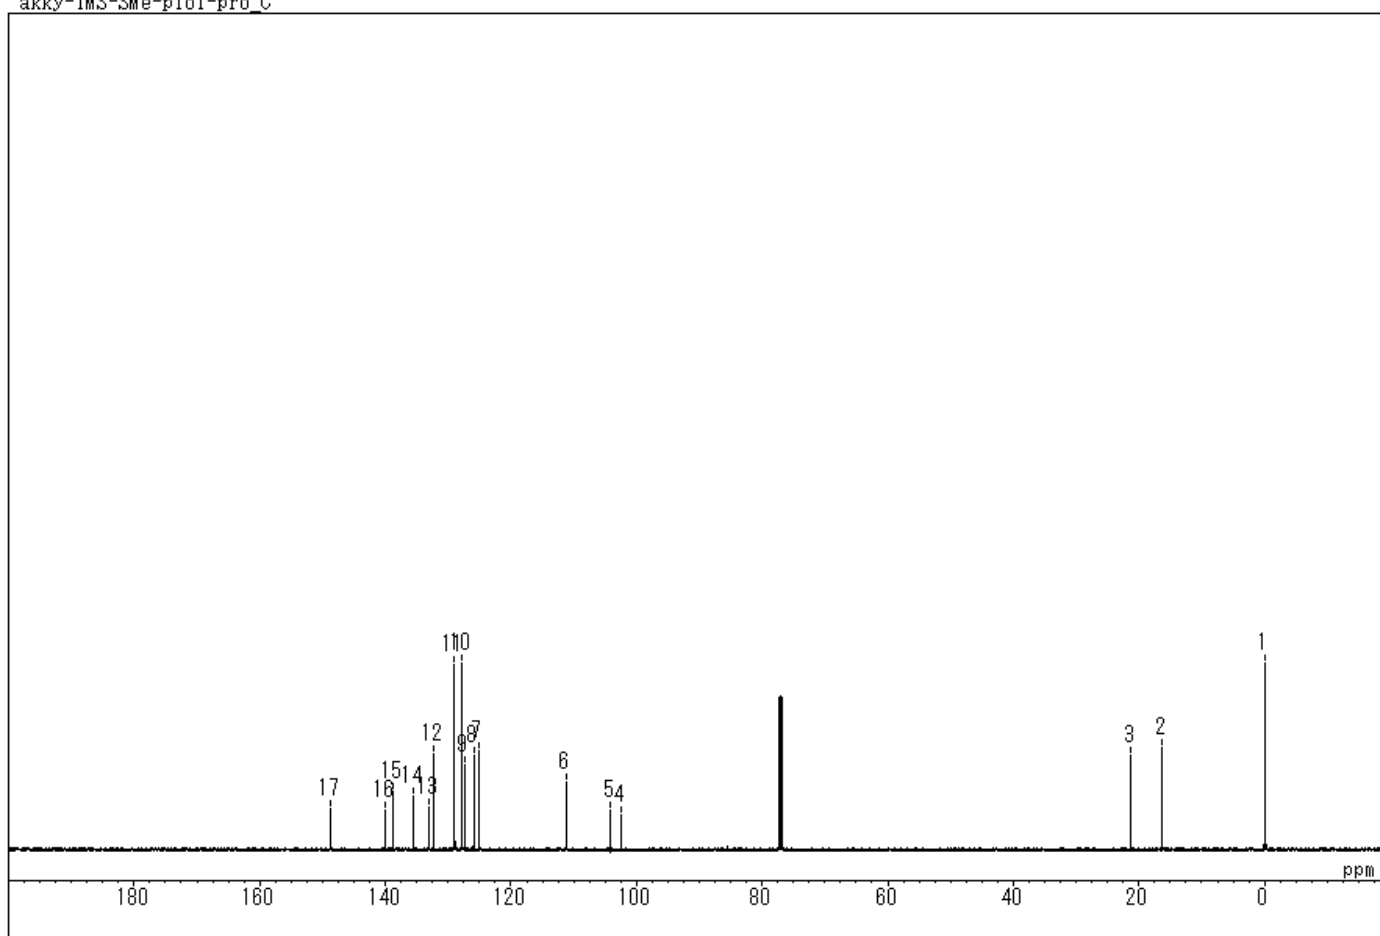

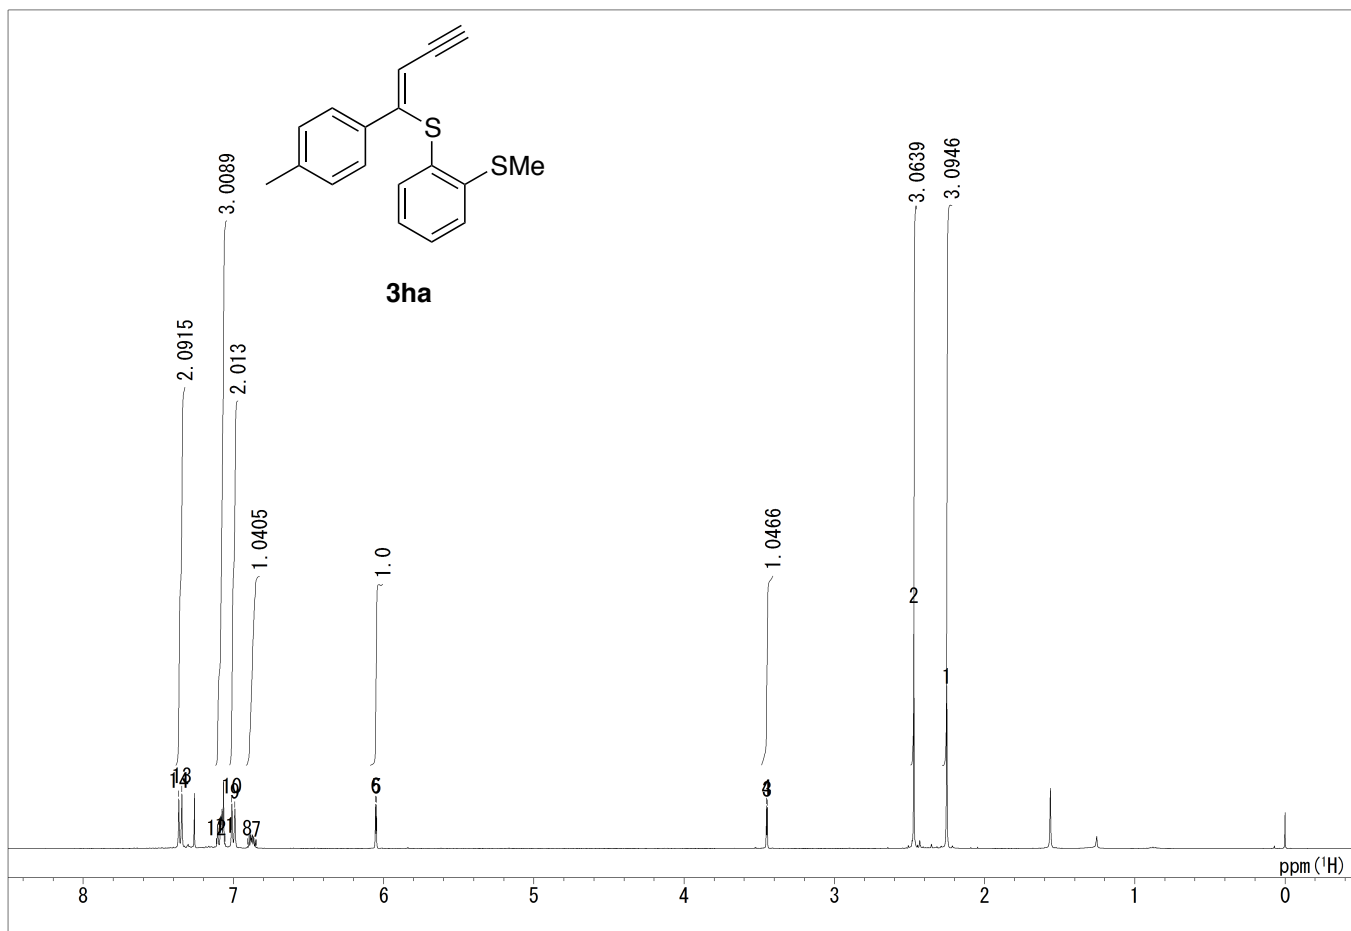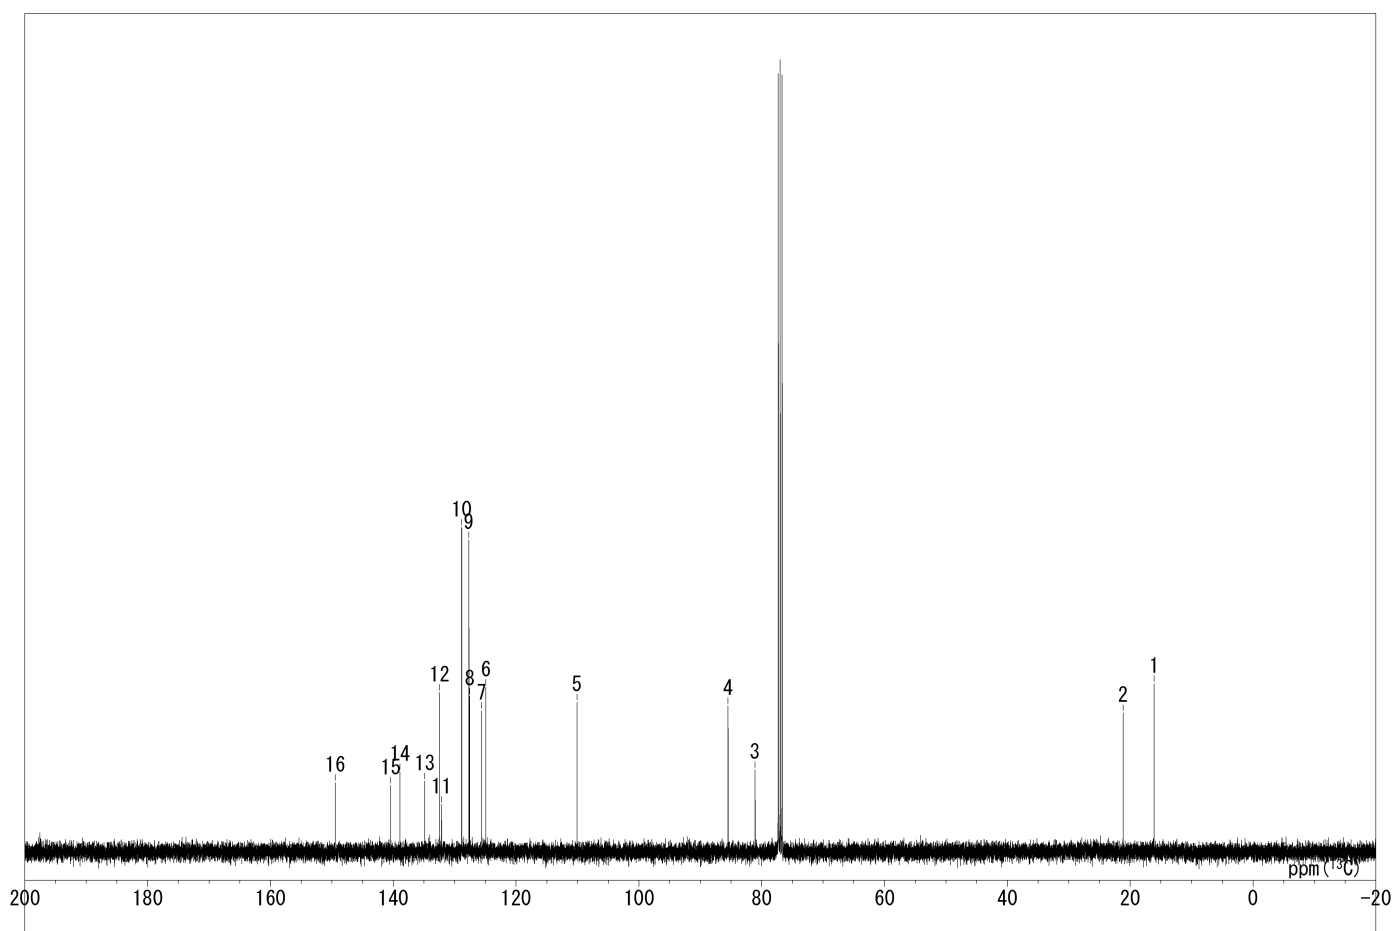



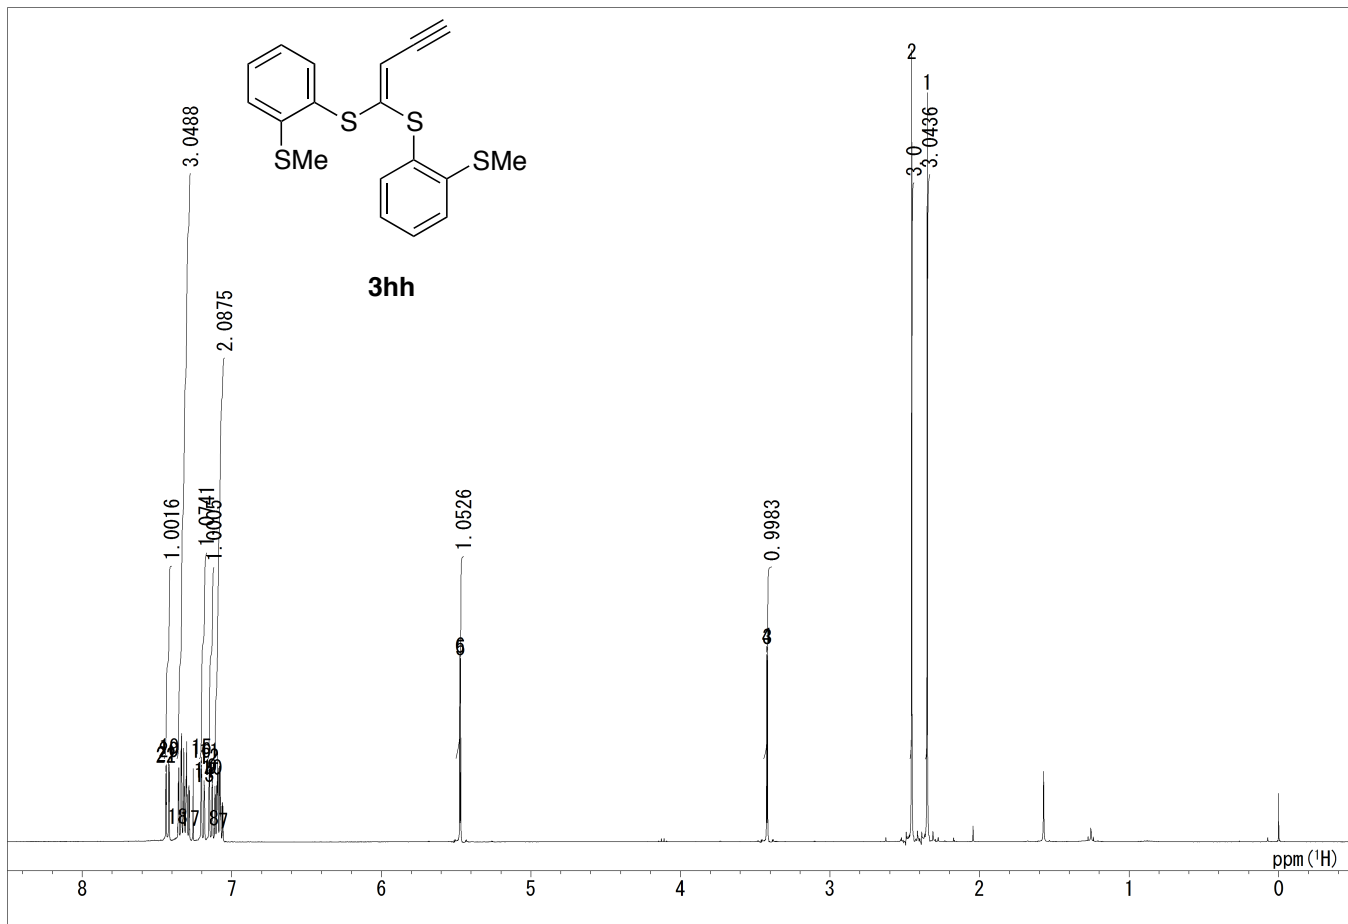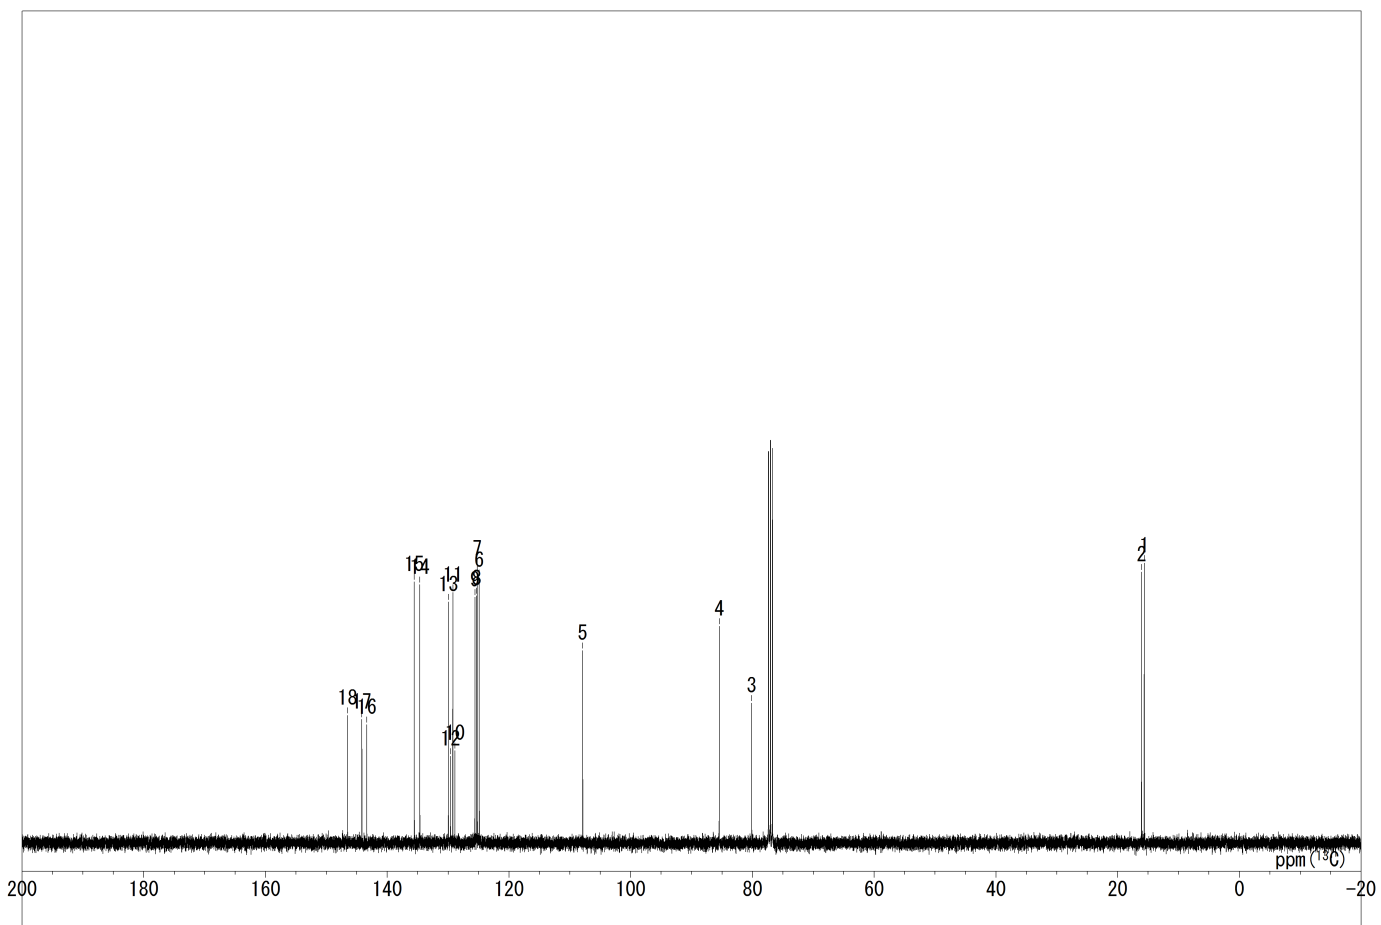

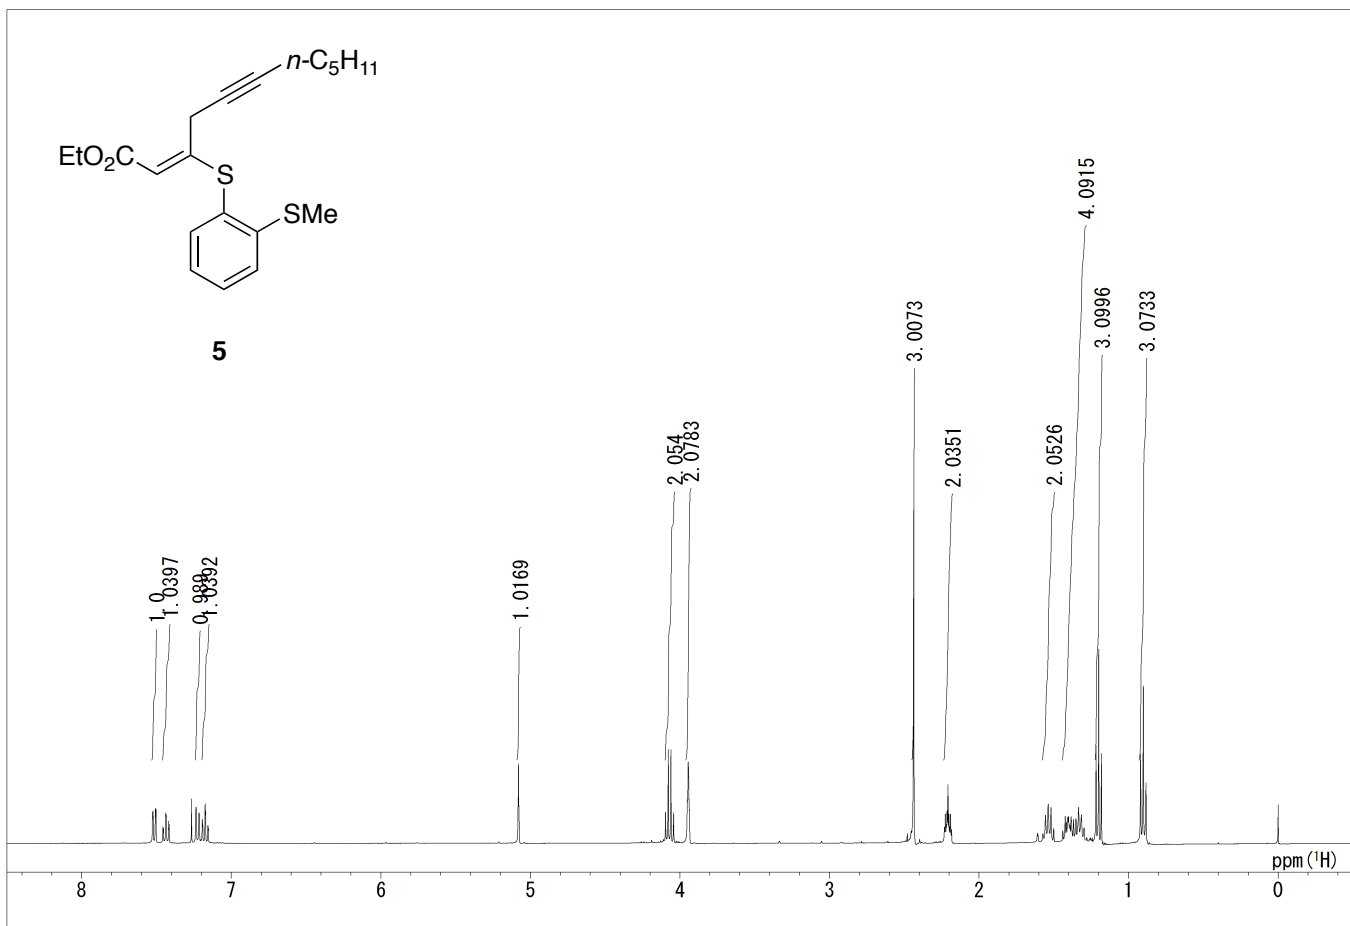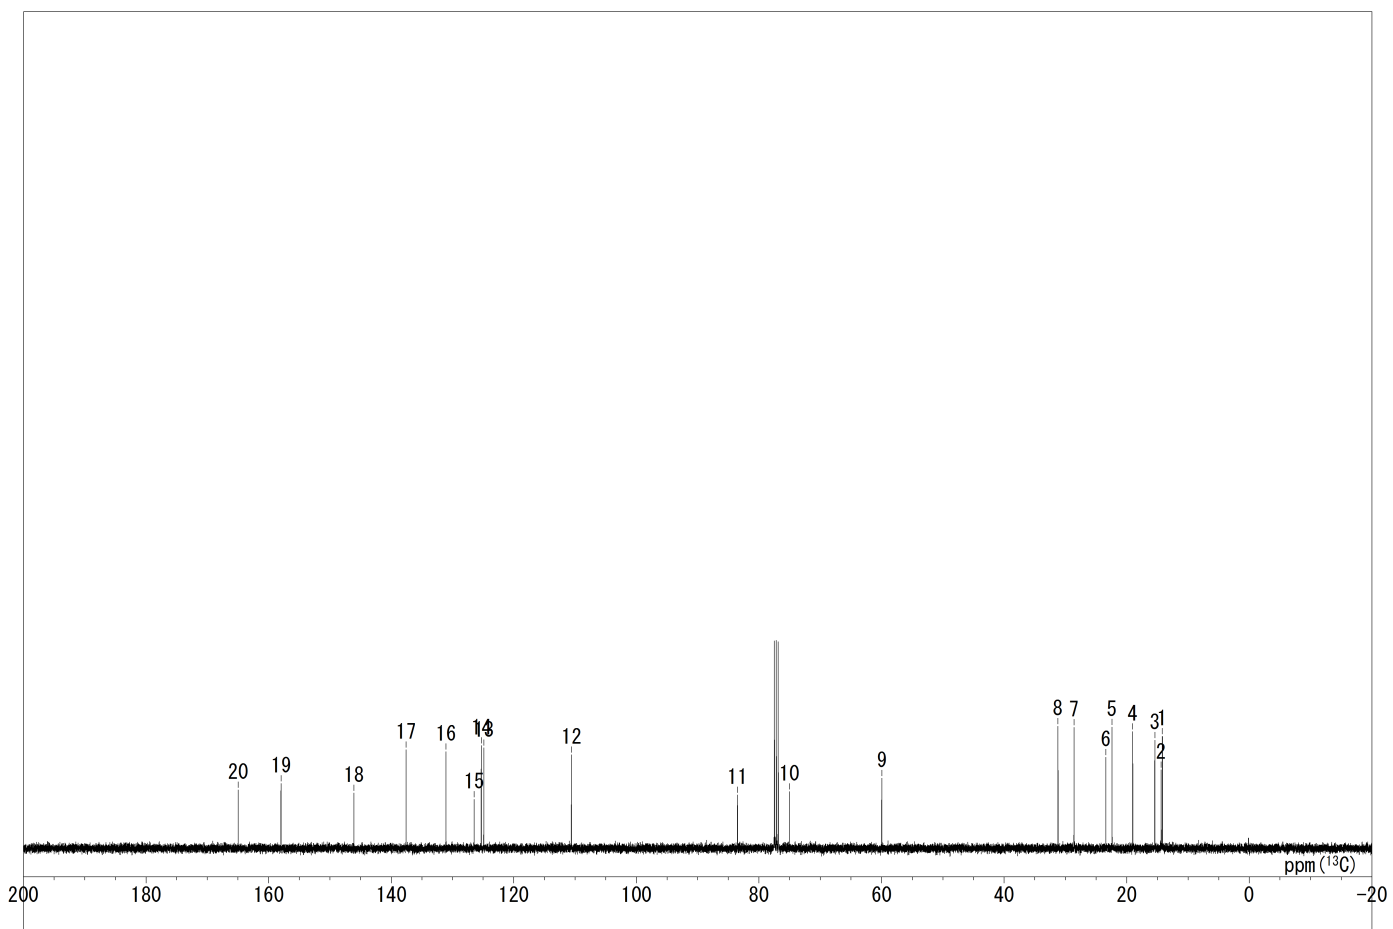

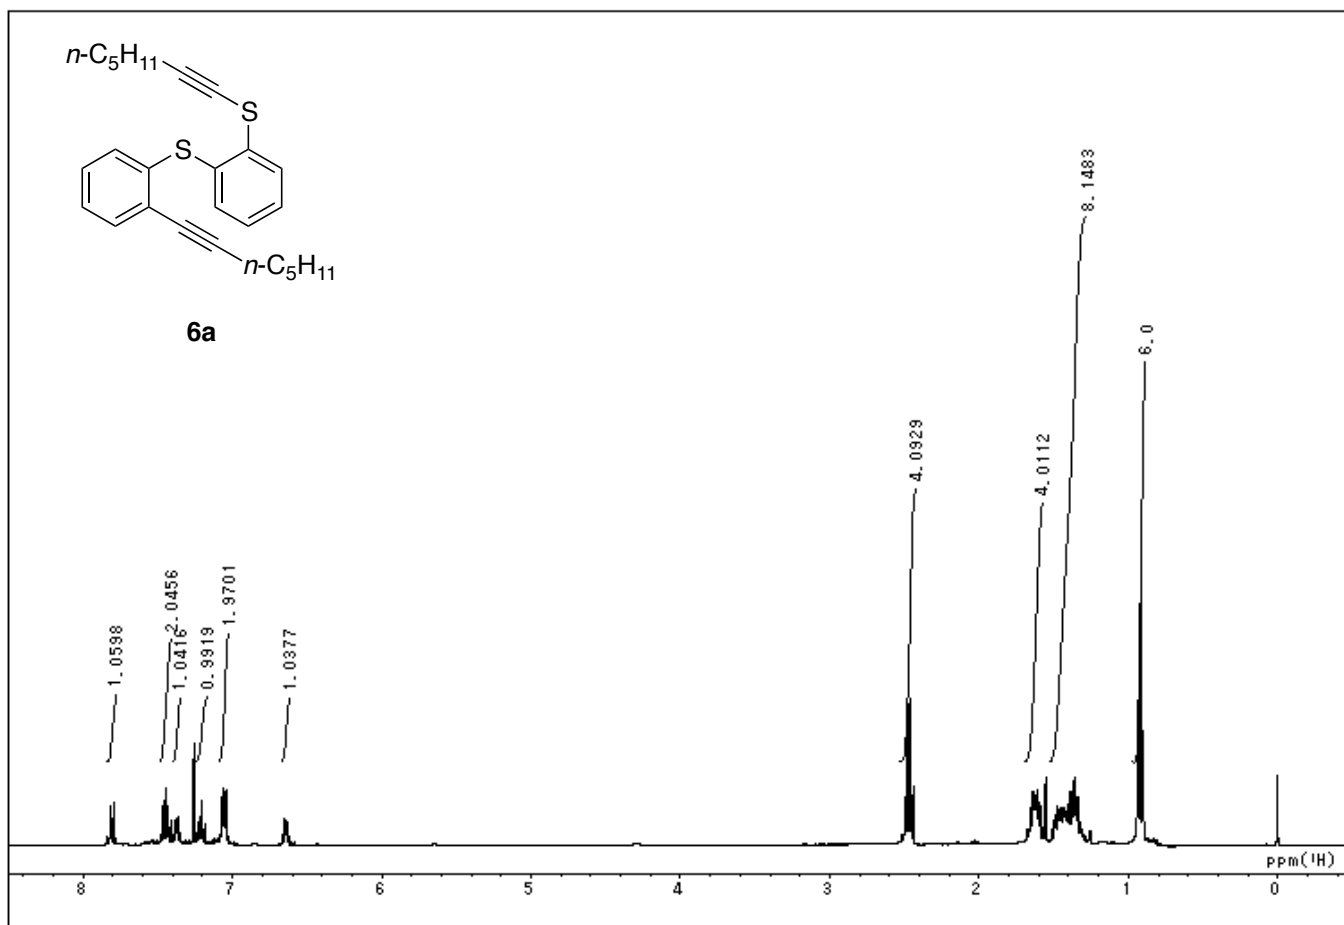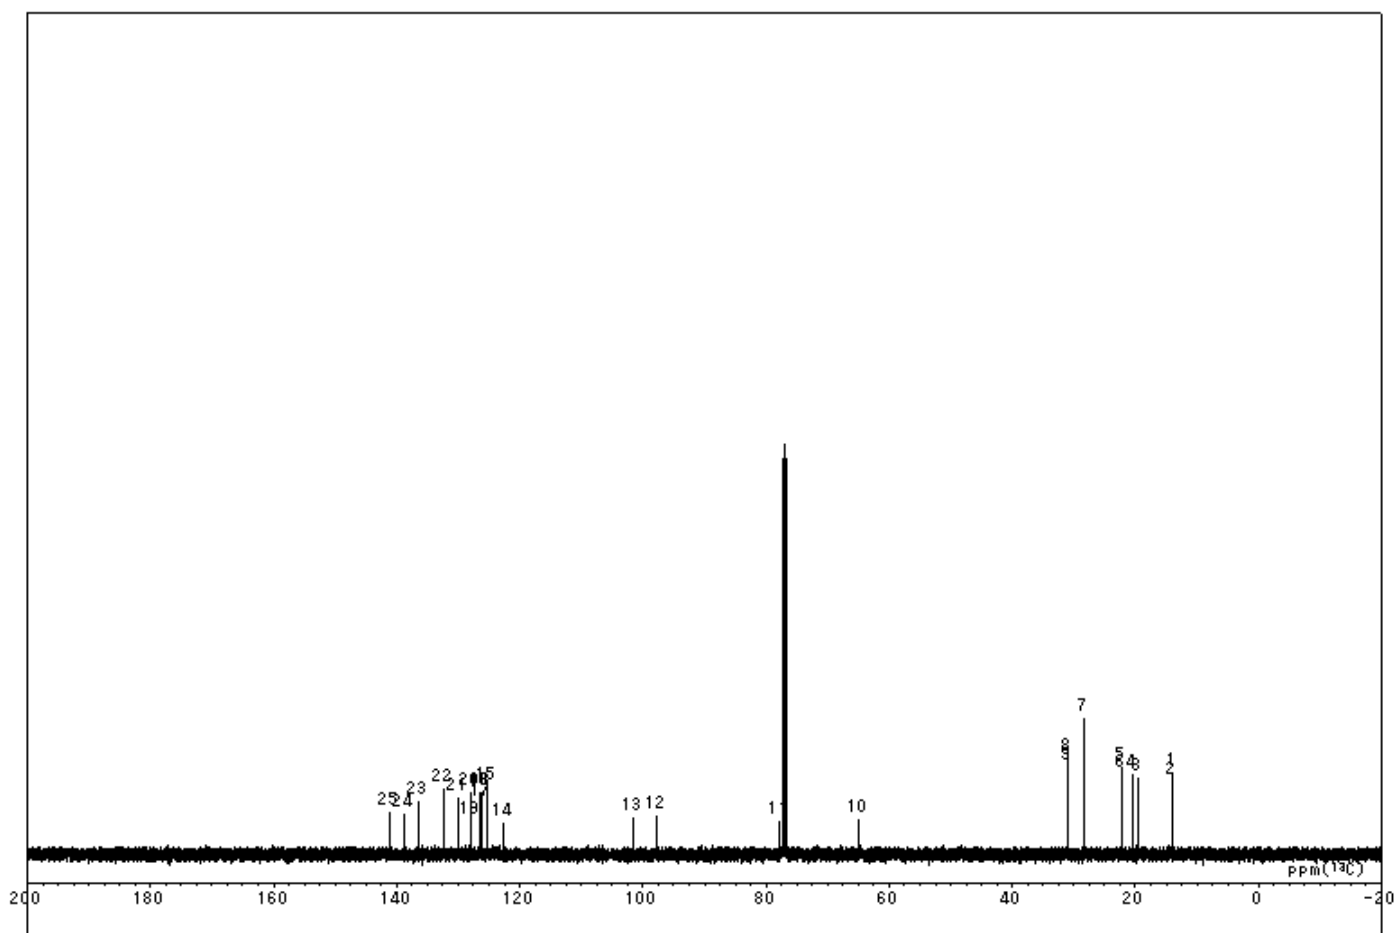

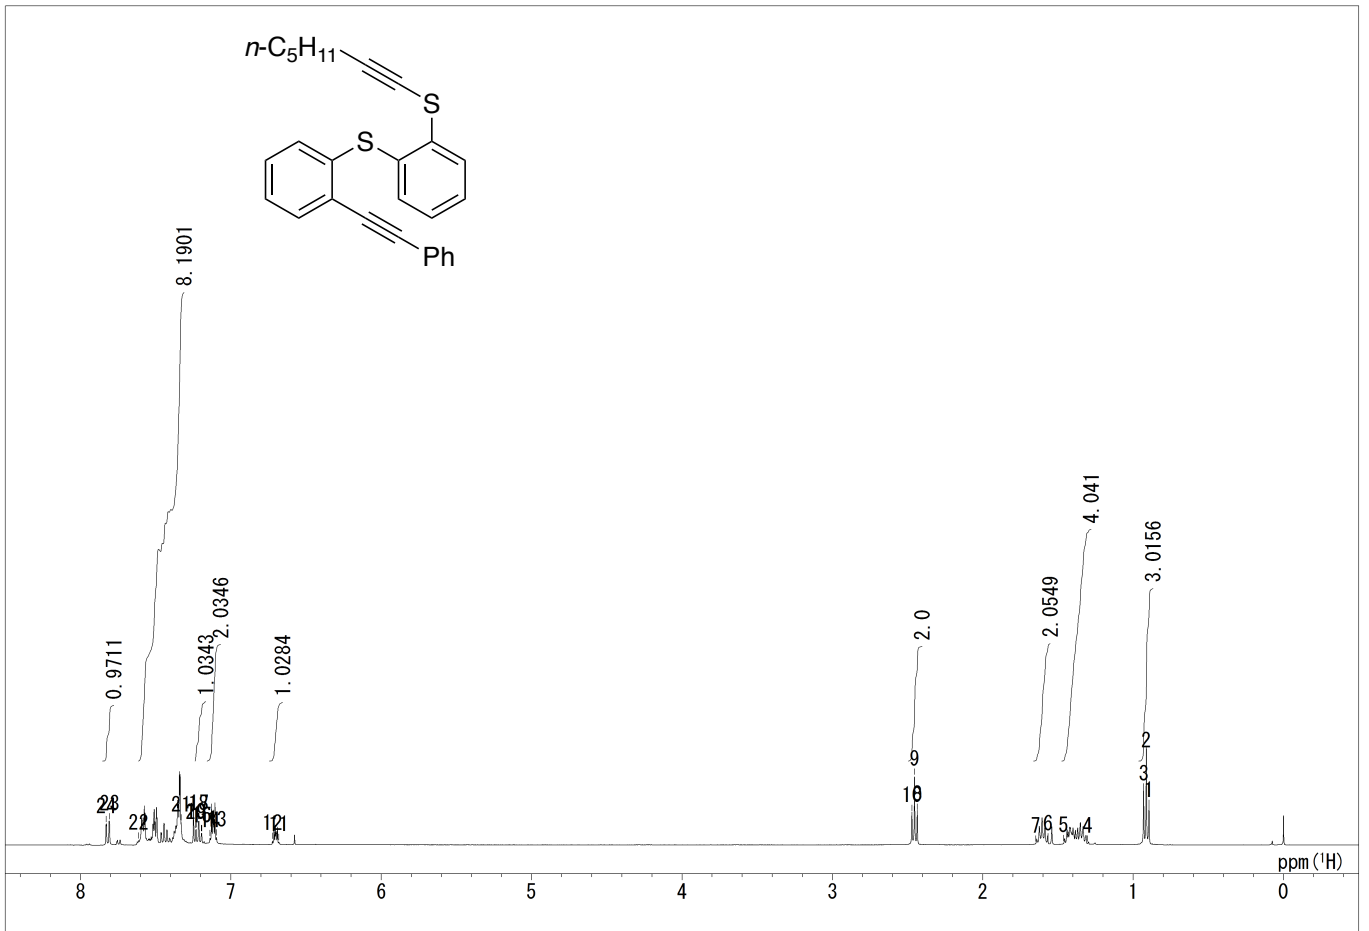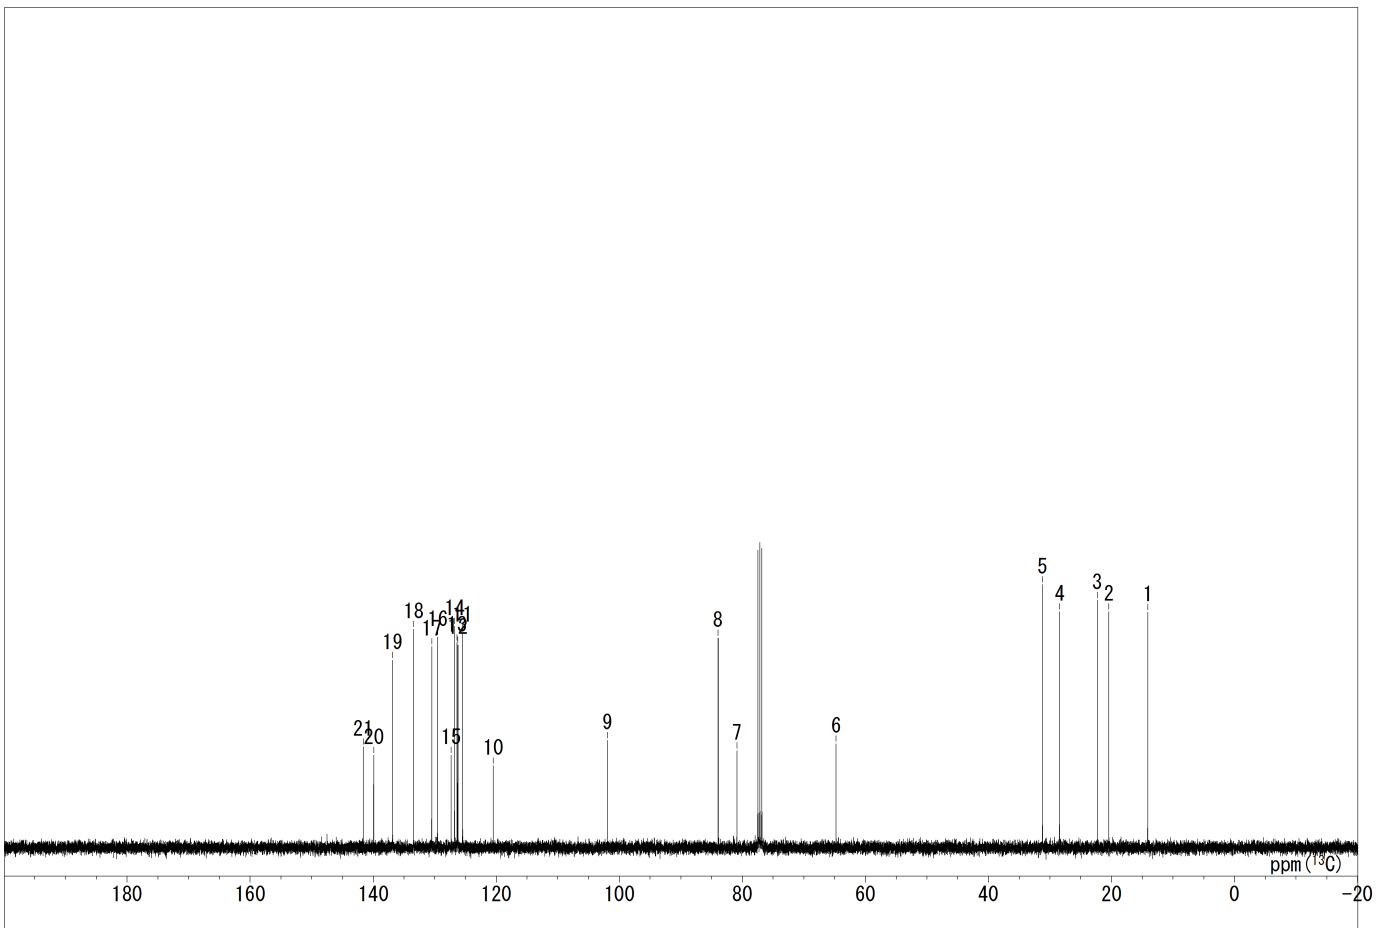

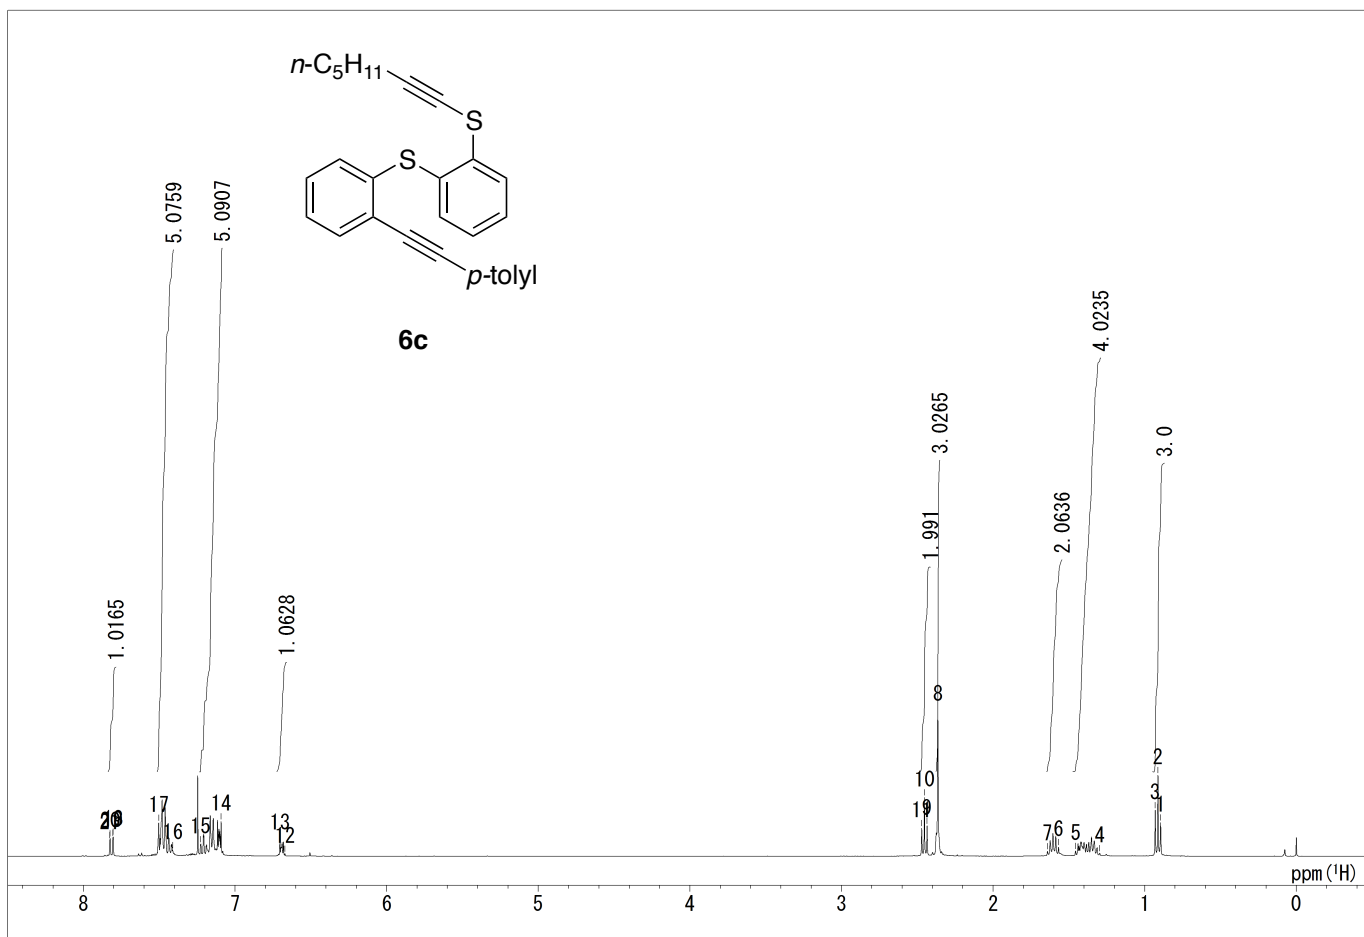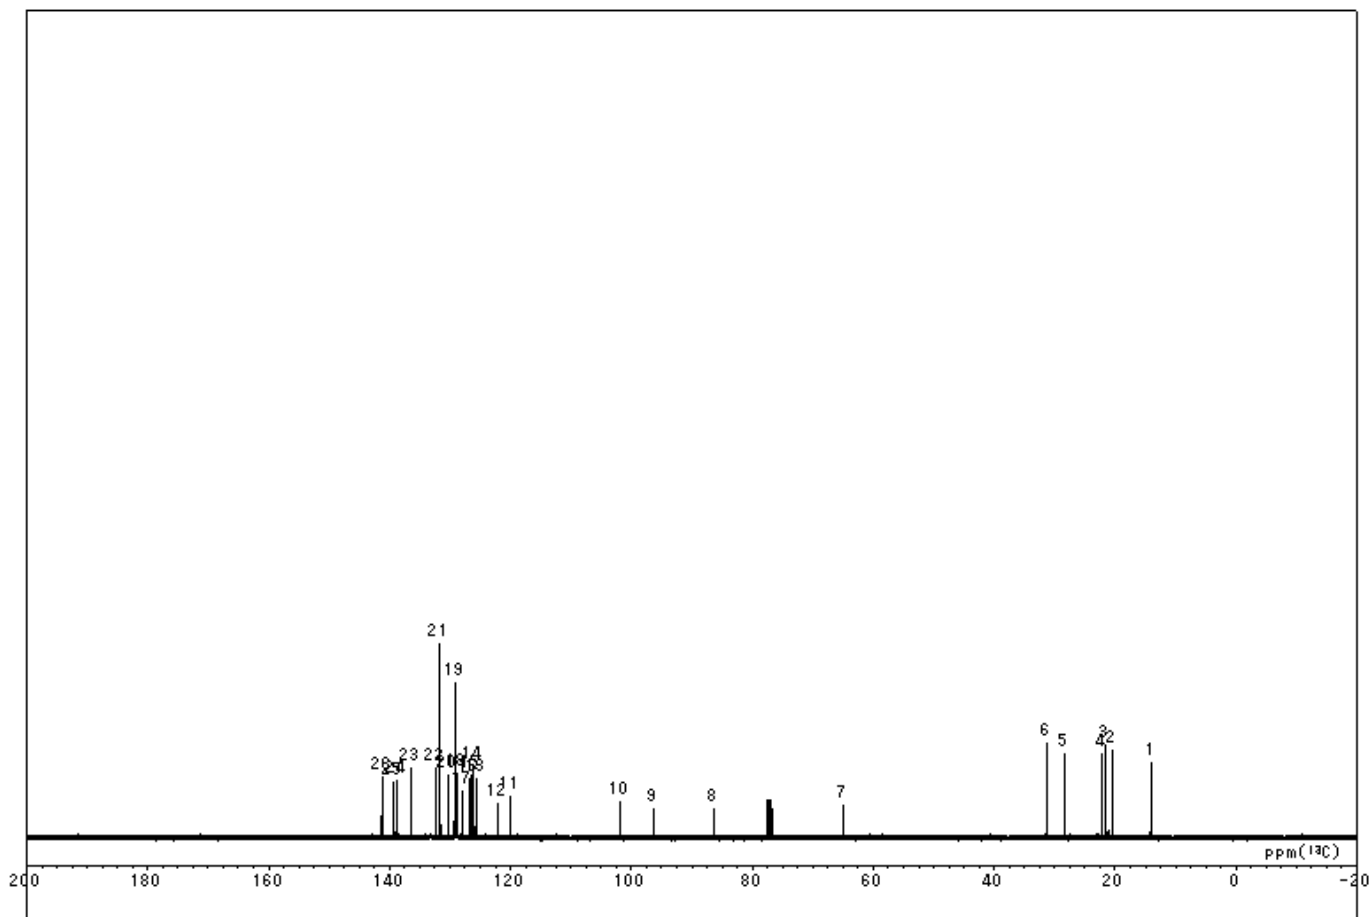

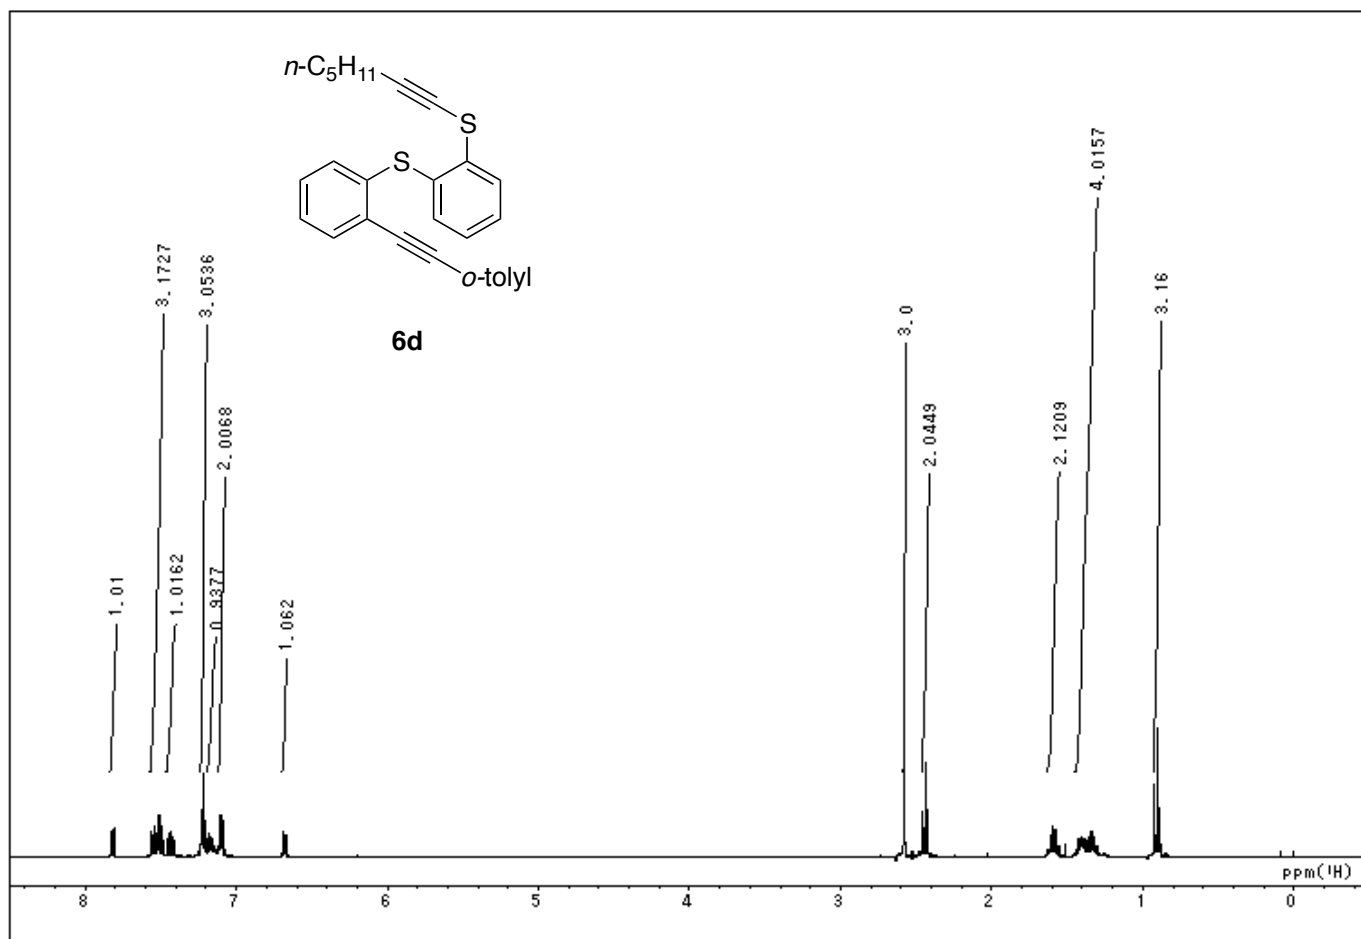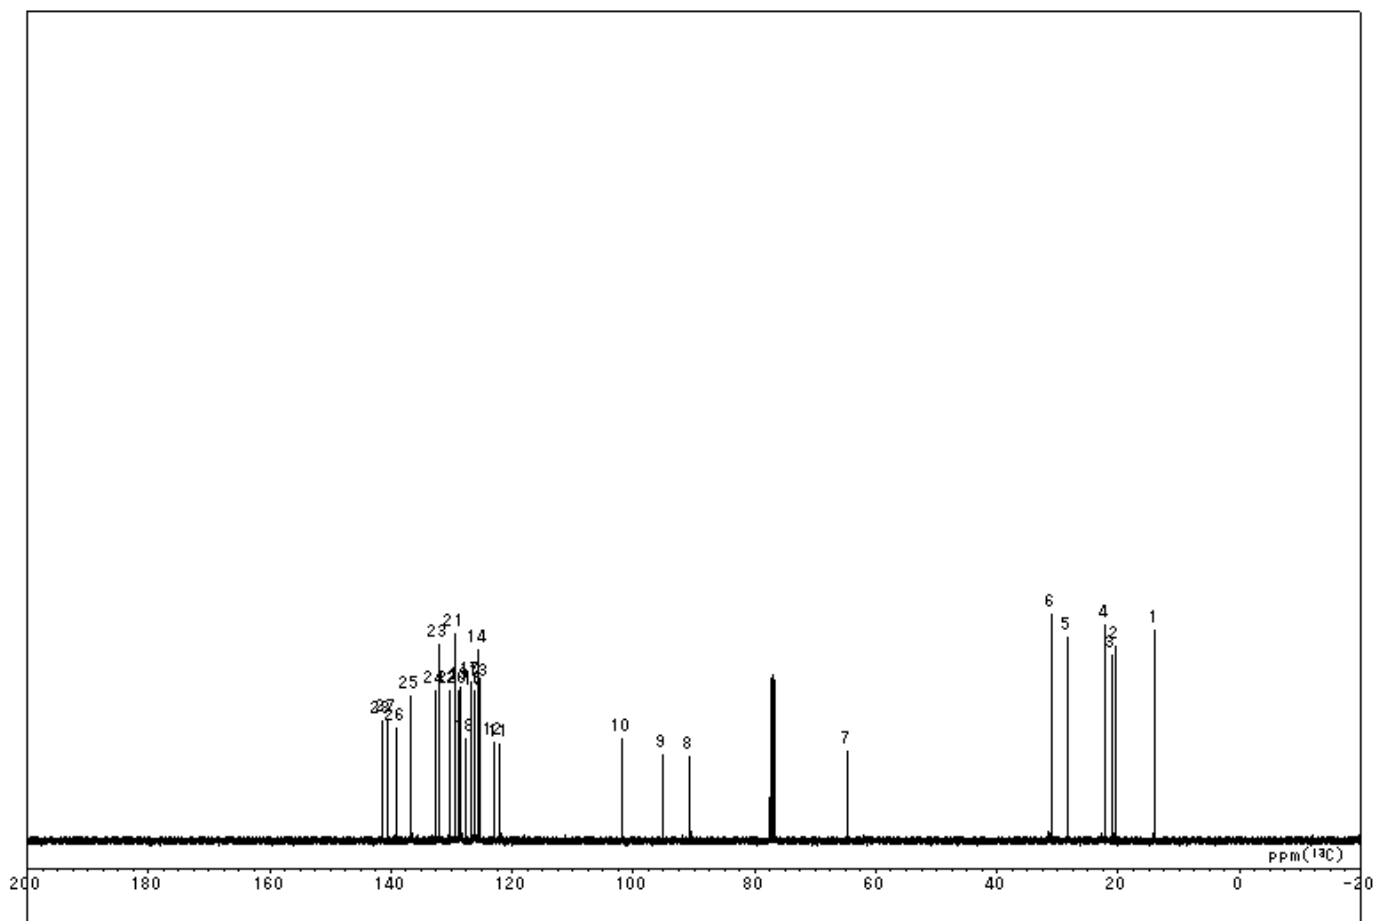

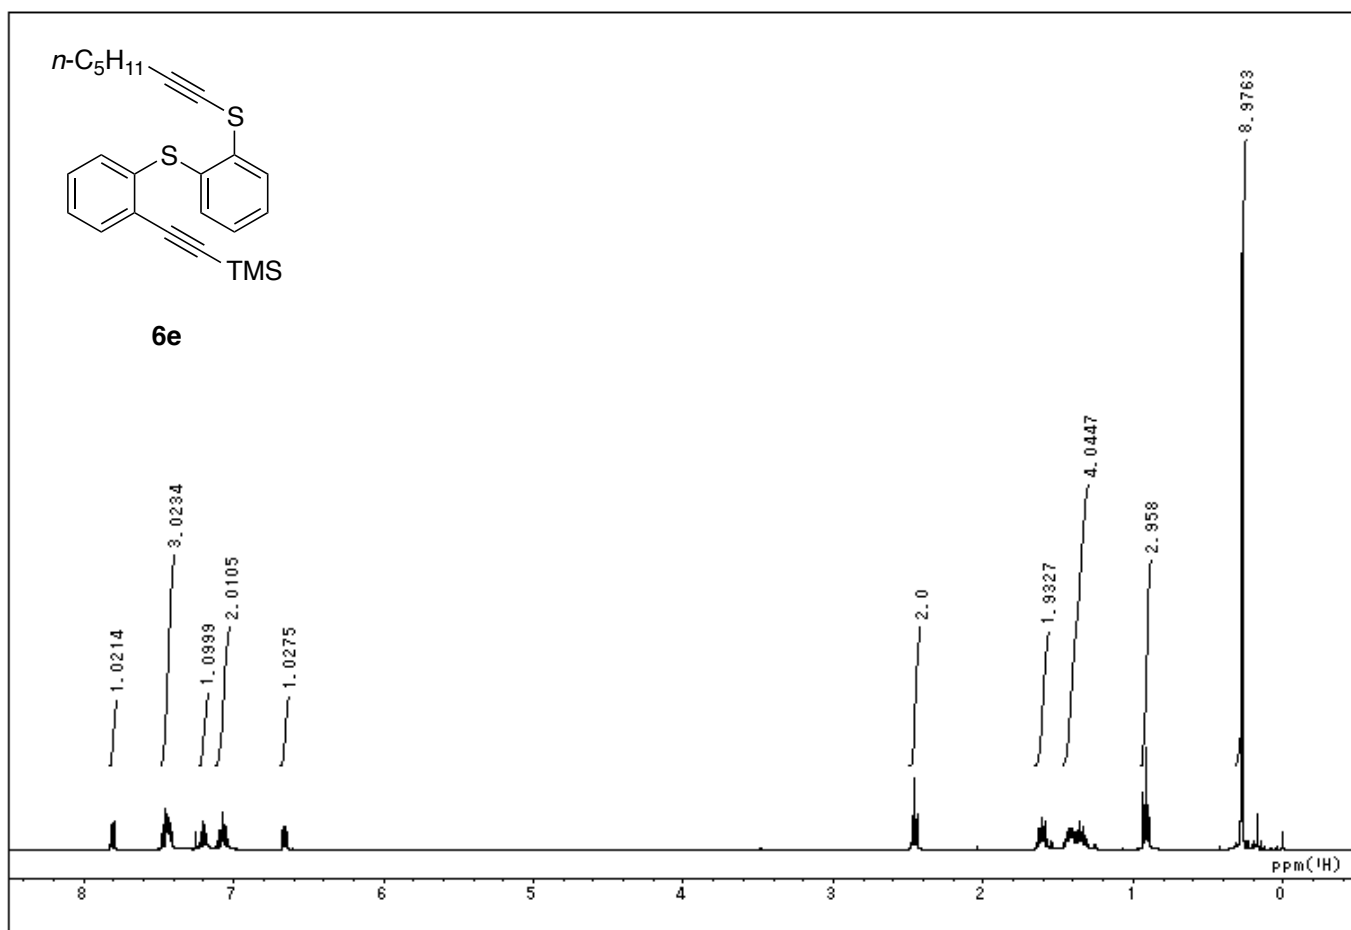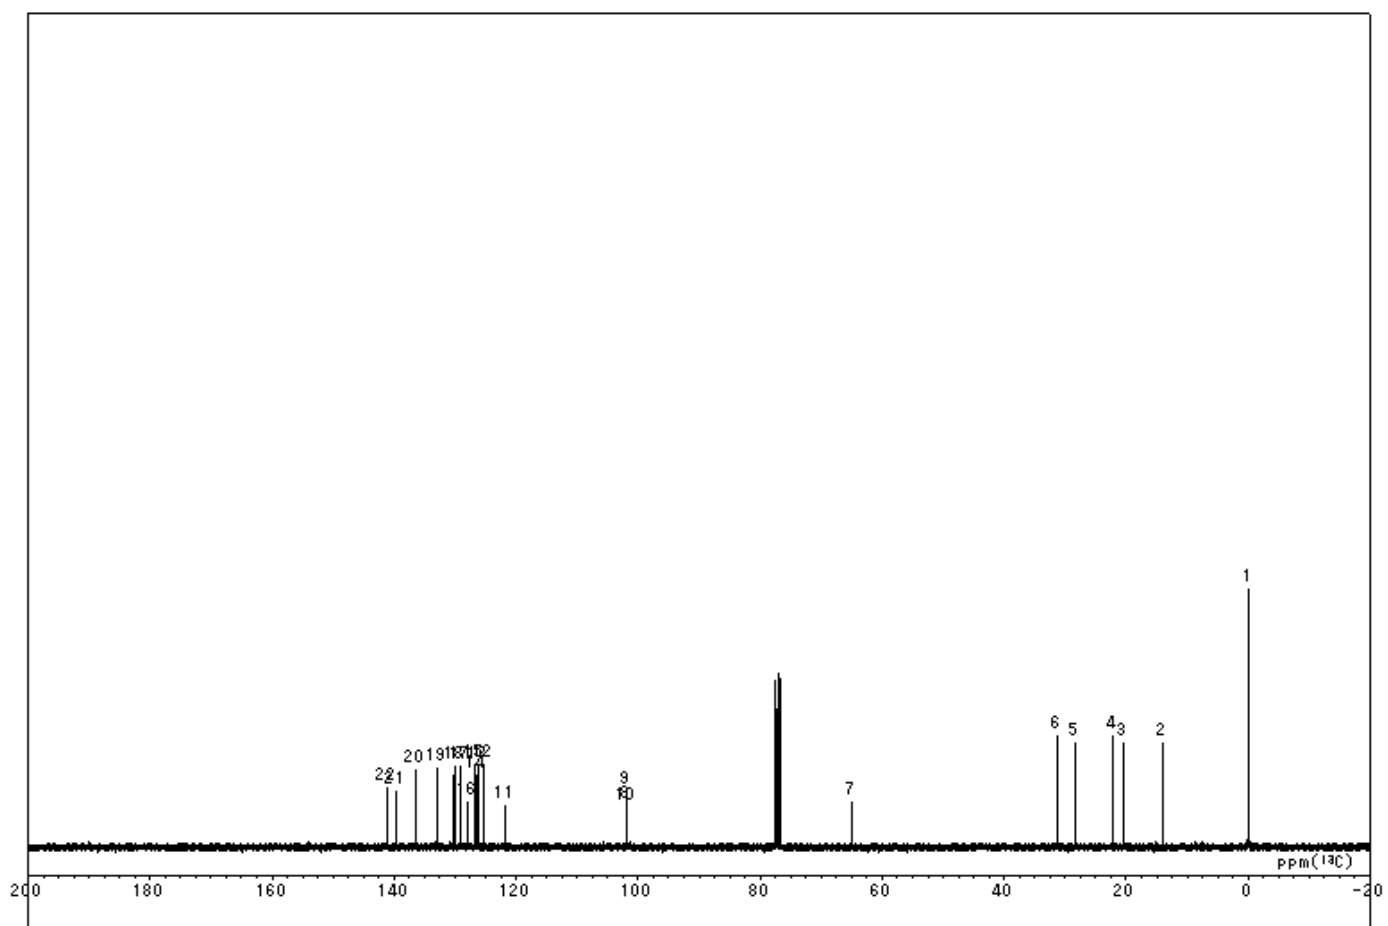

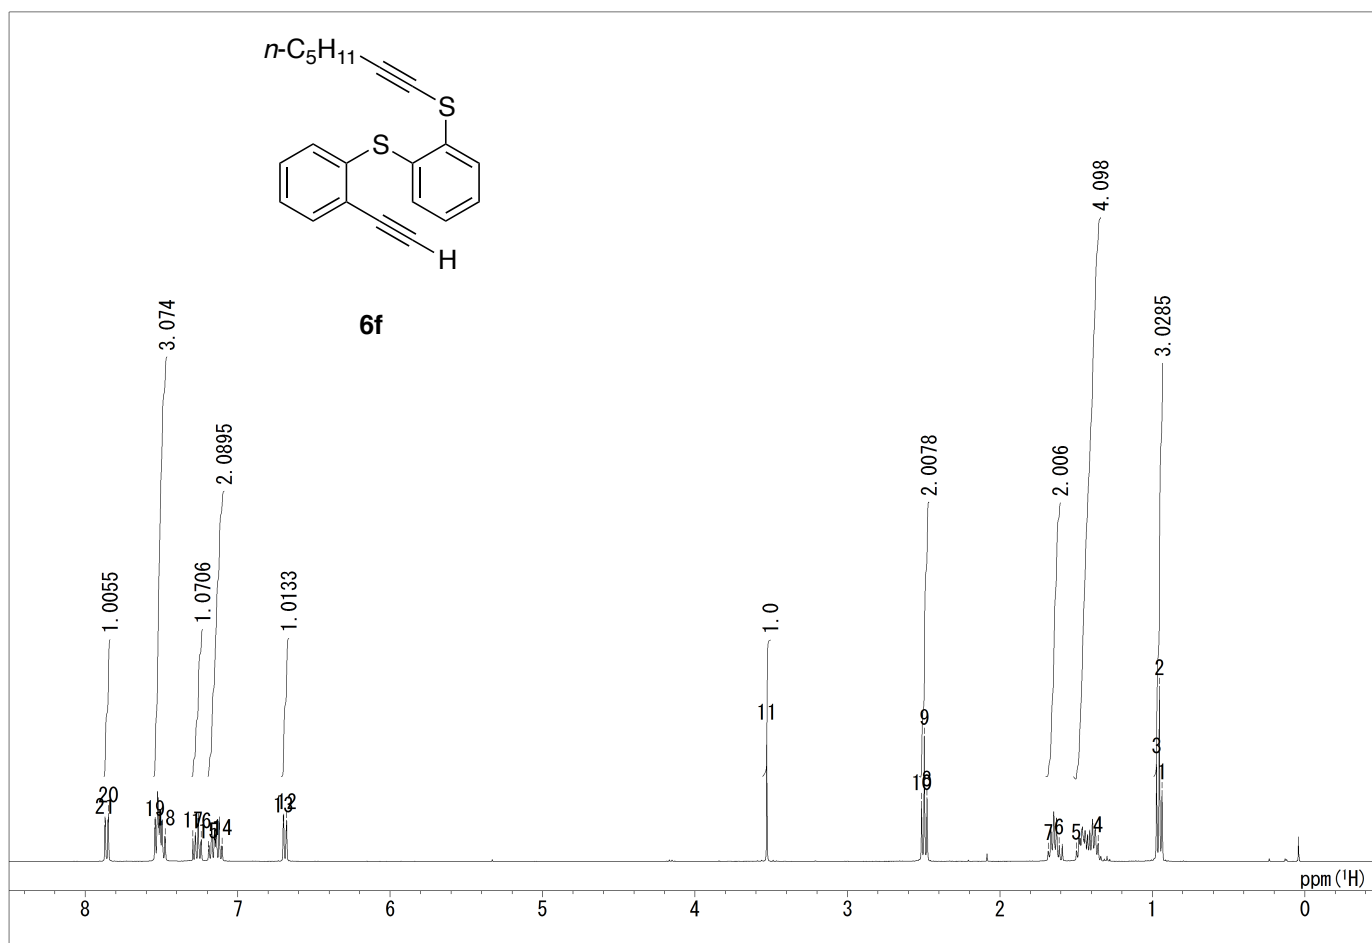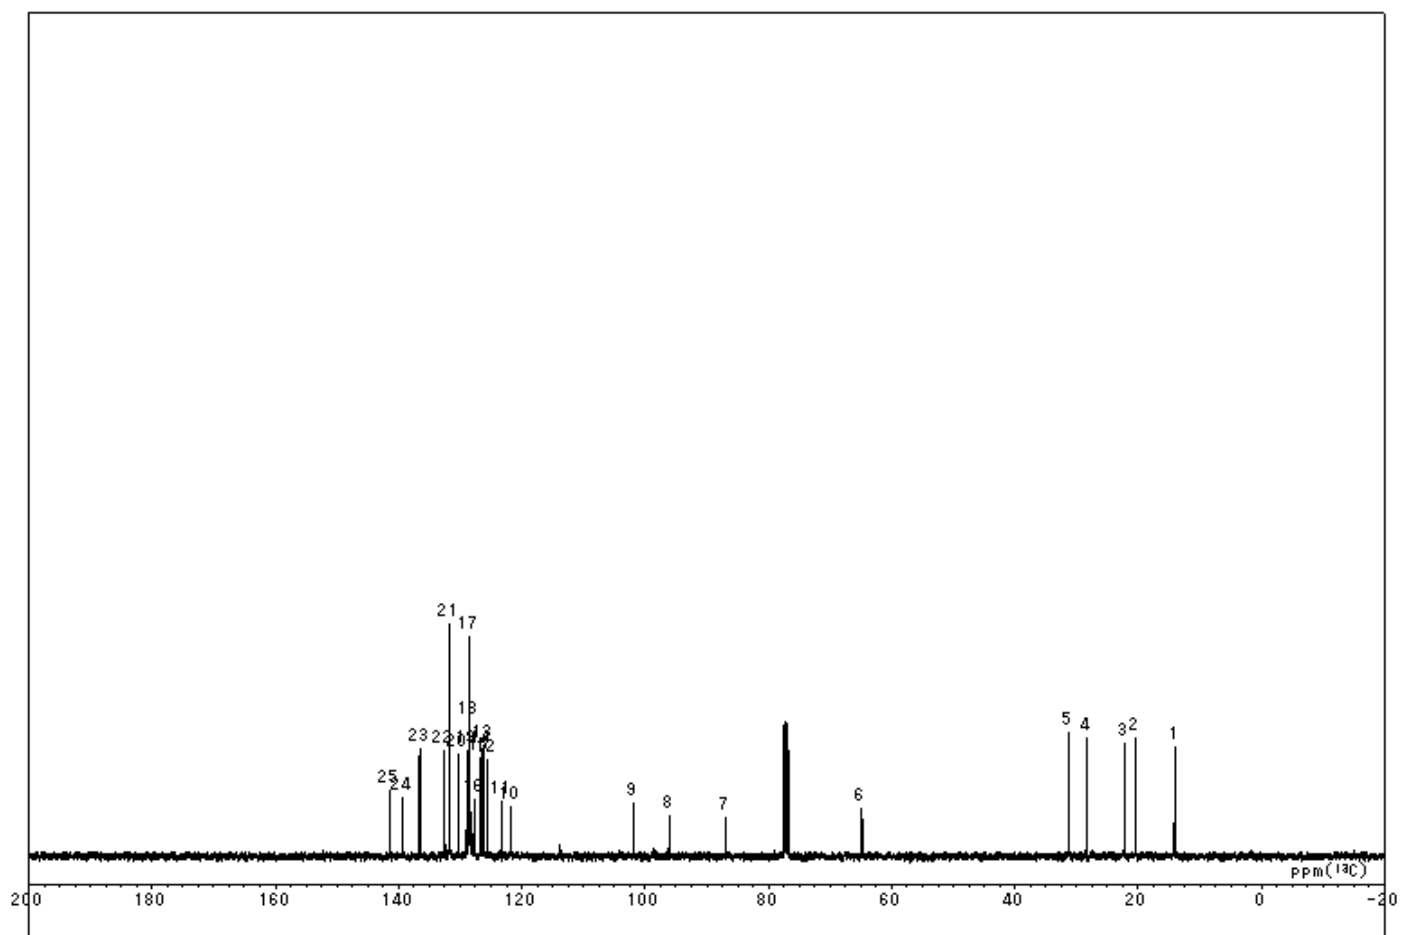



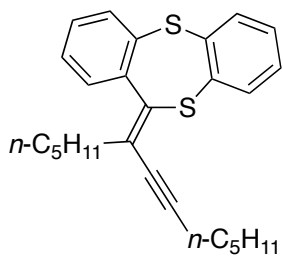

**7a**

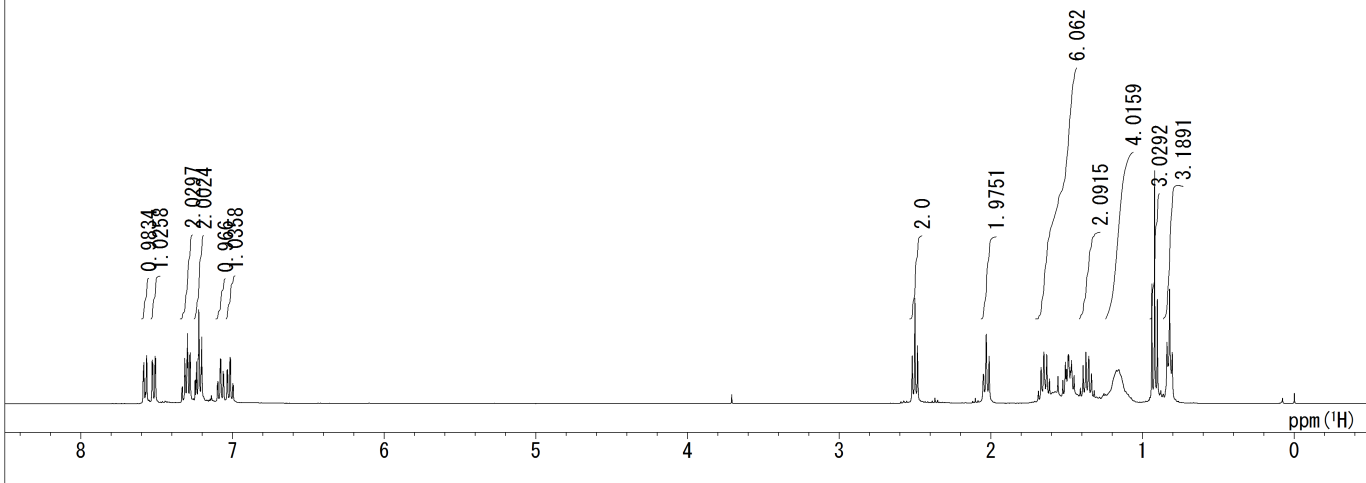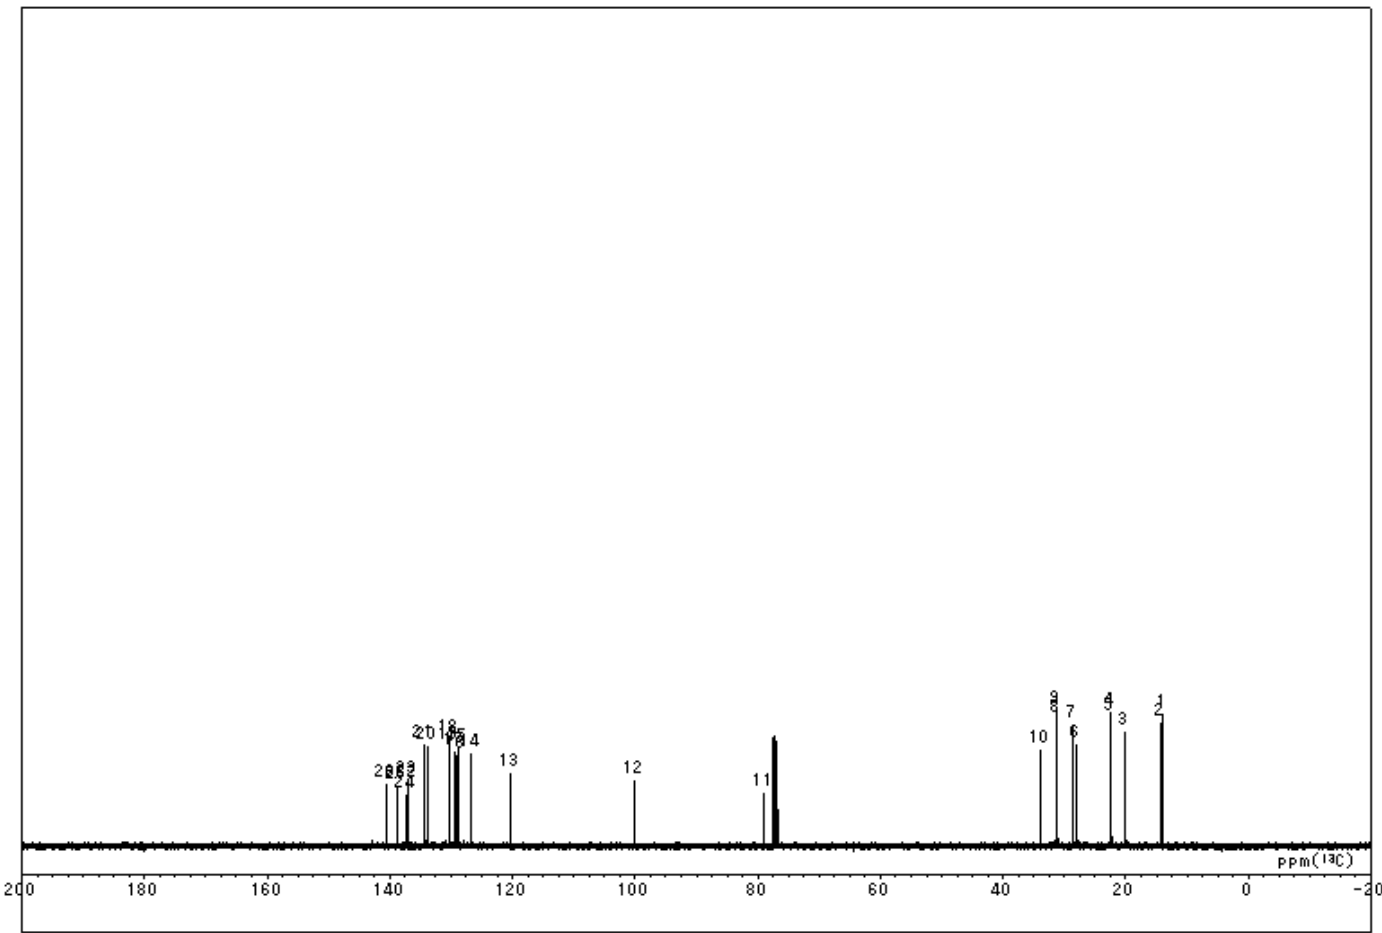

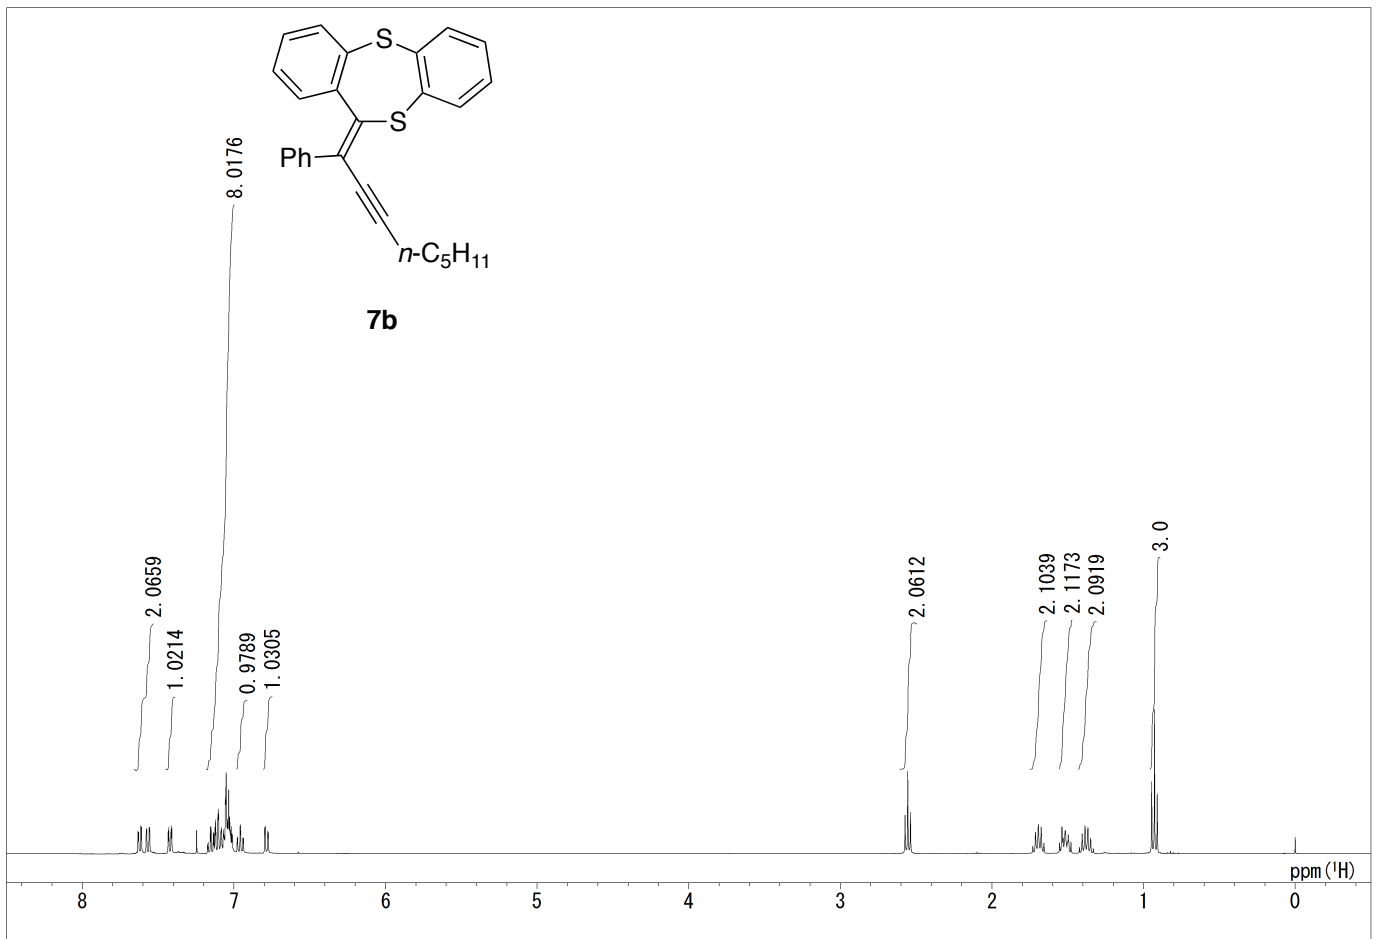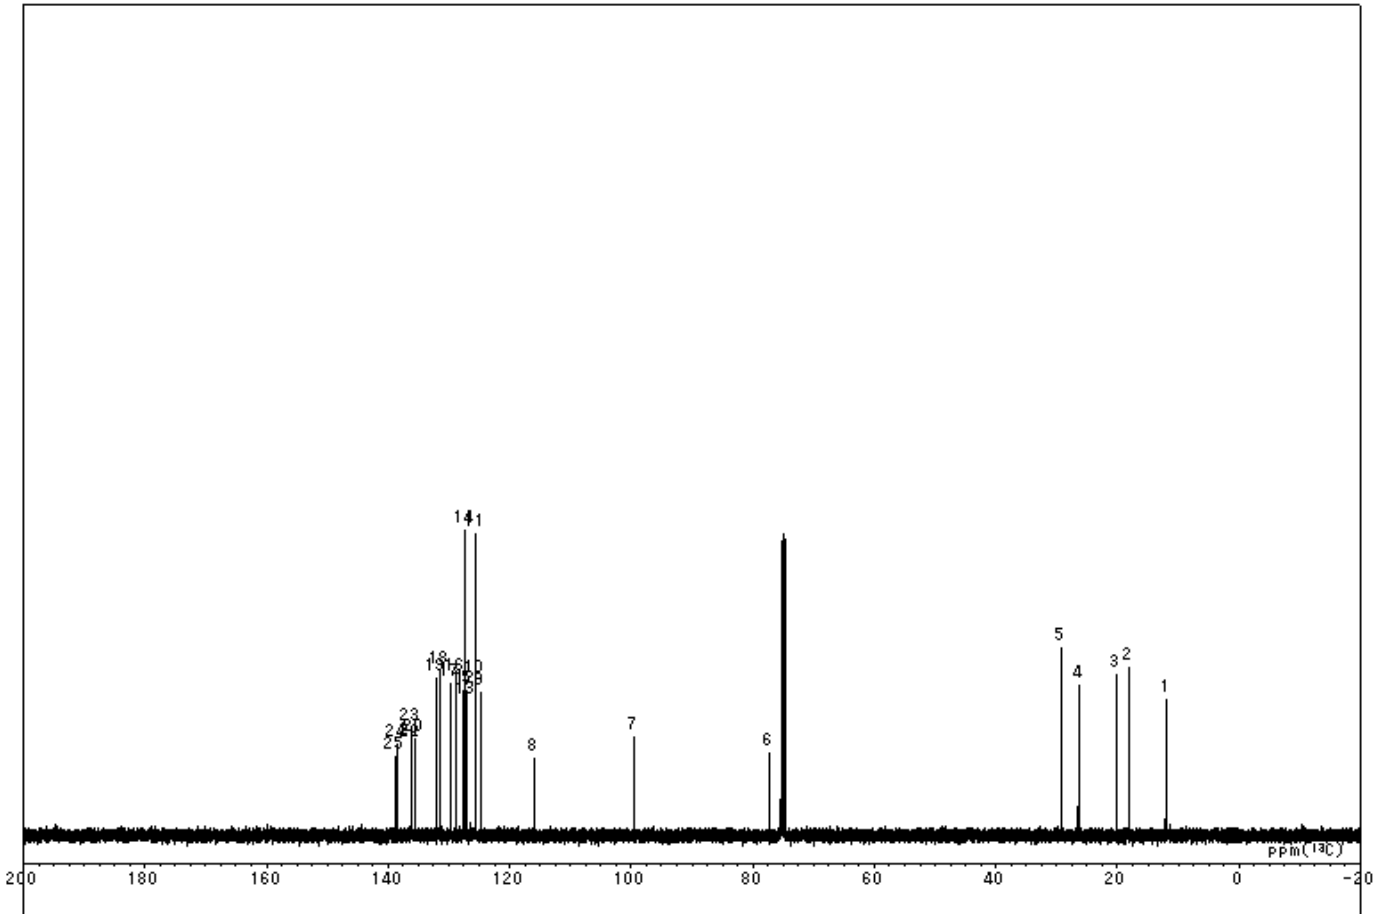

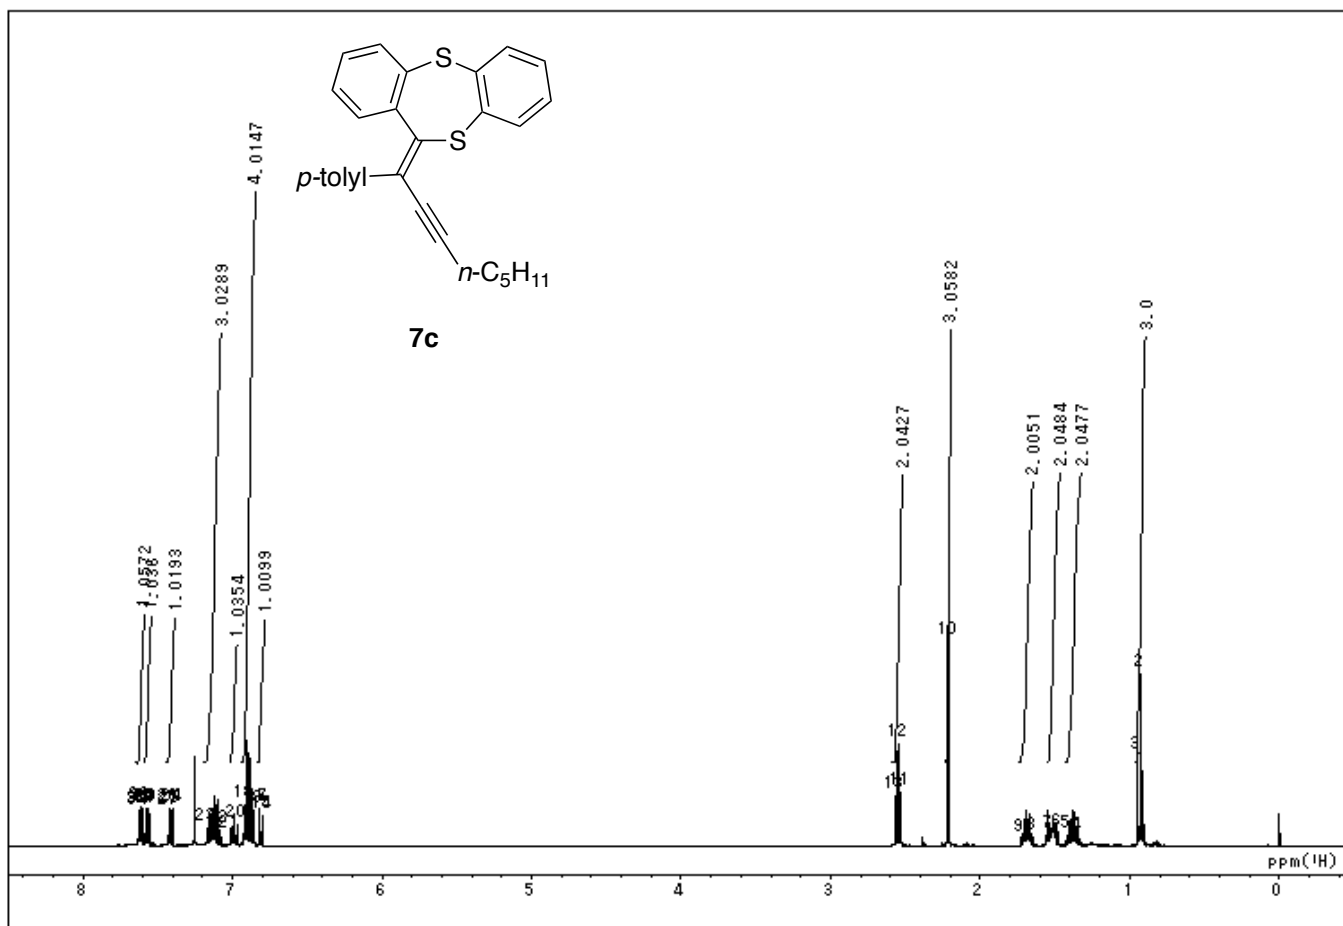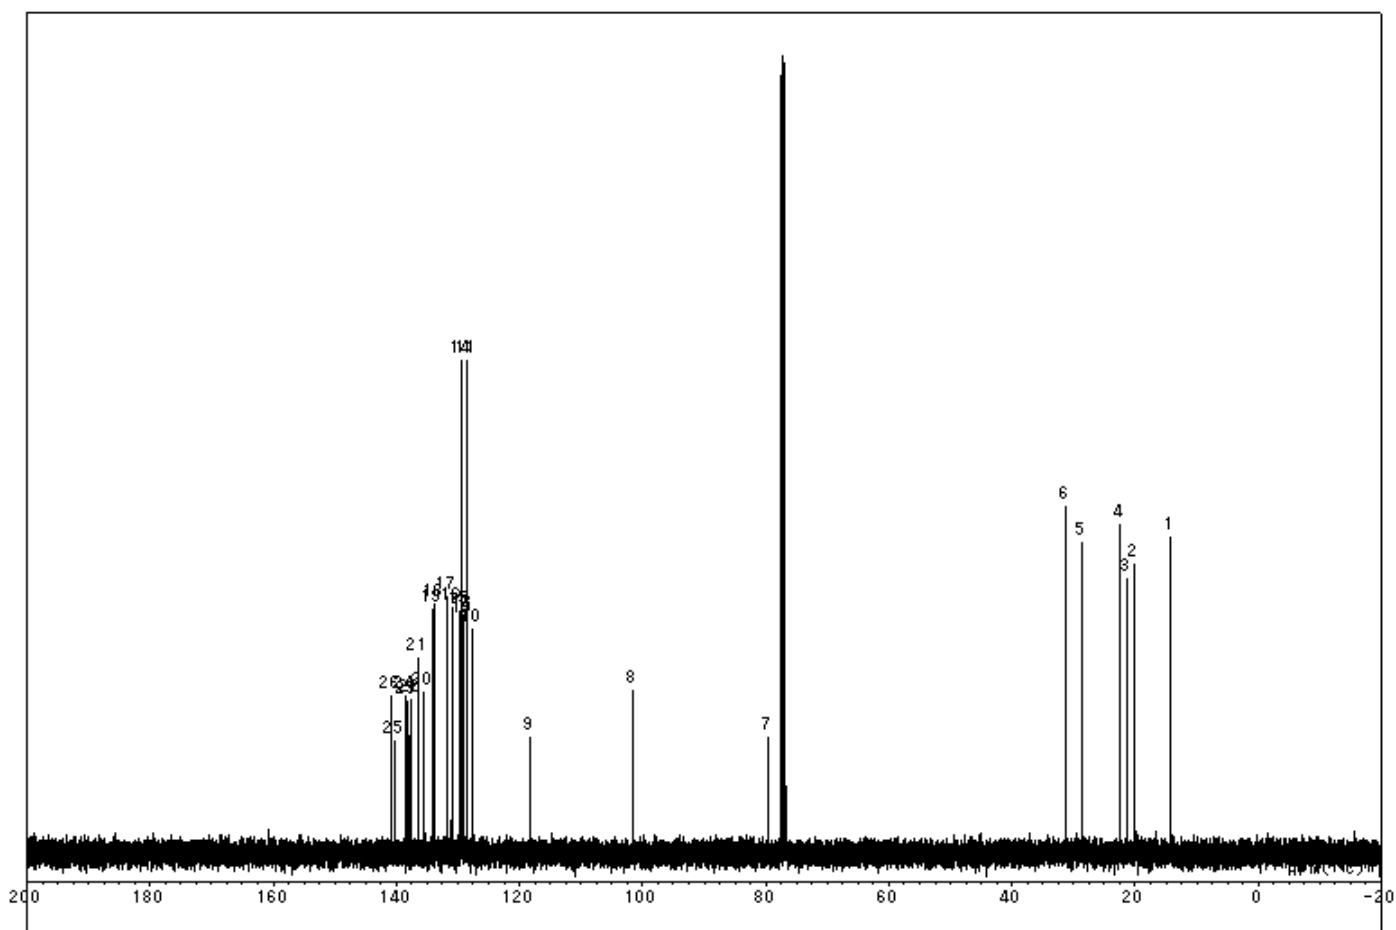

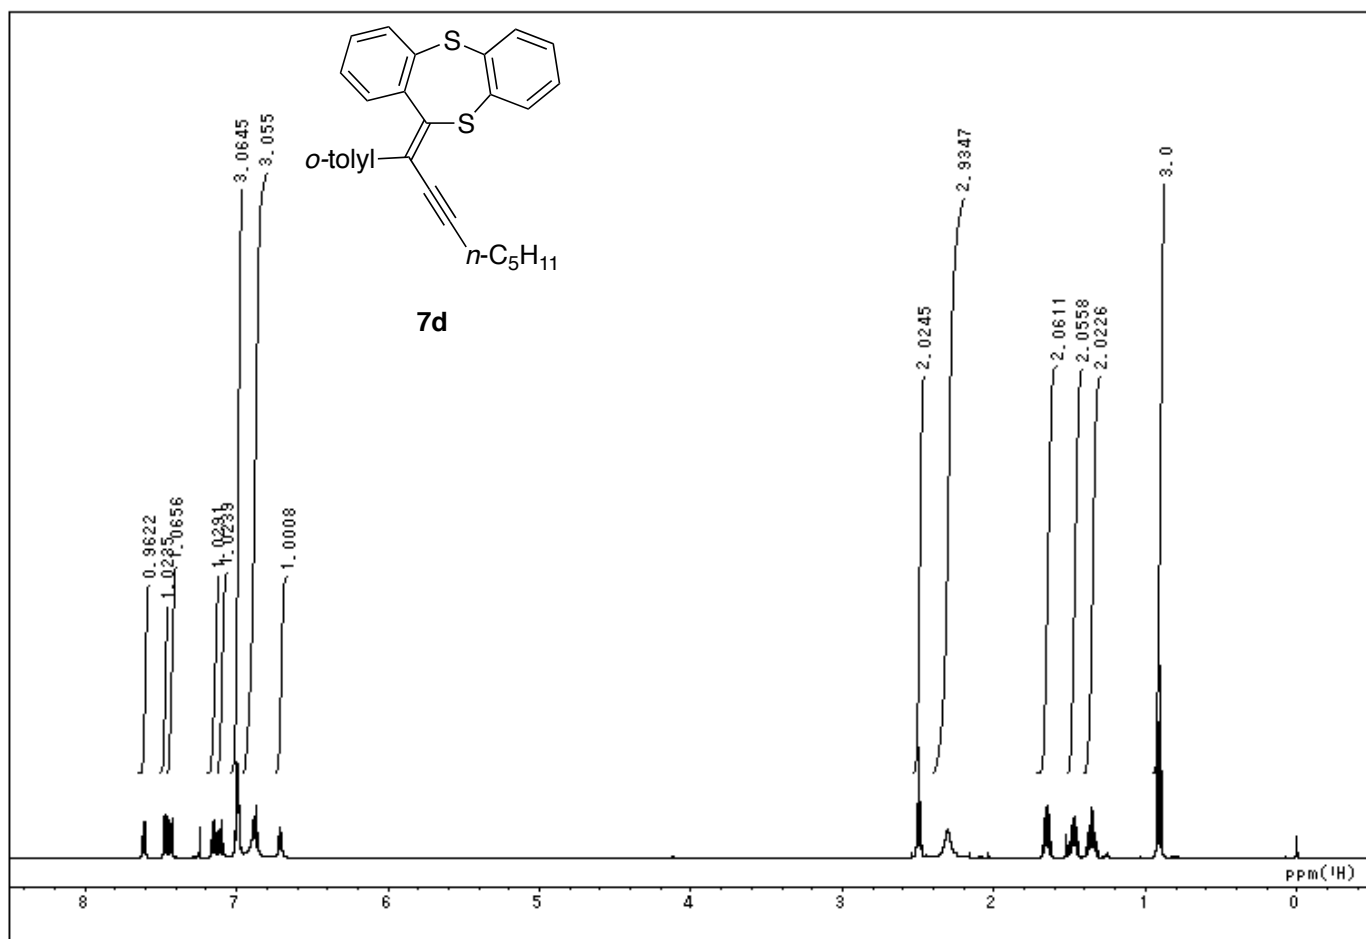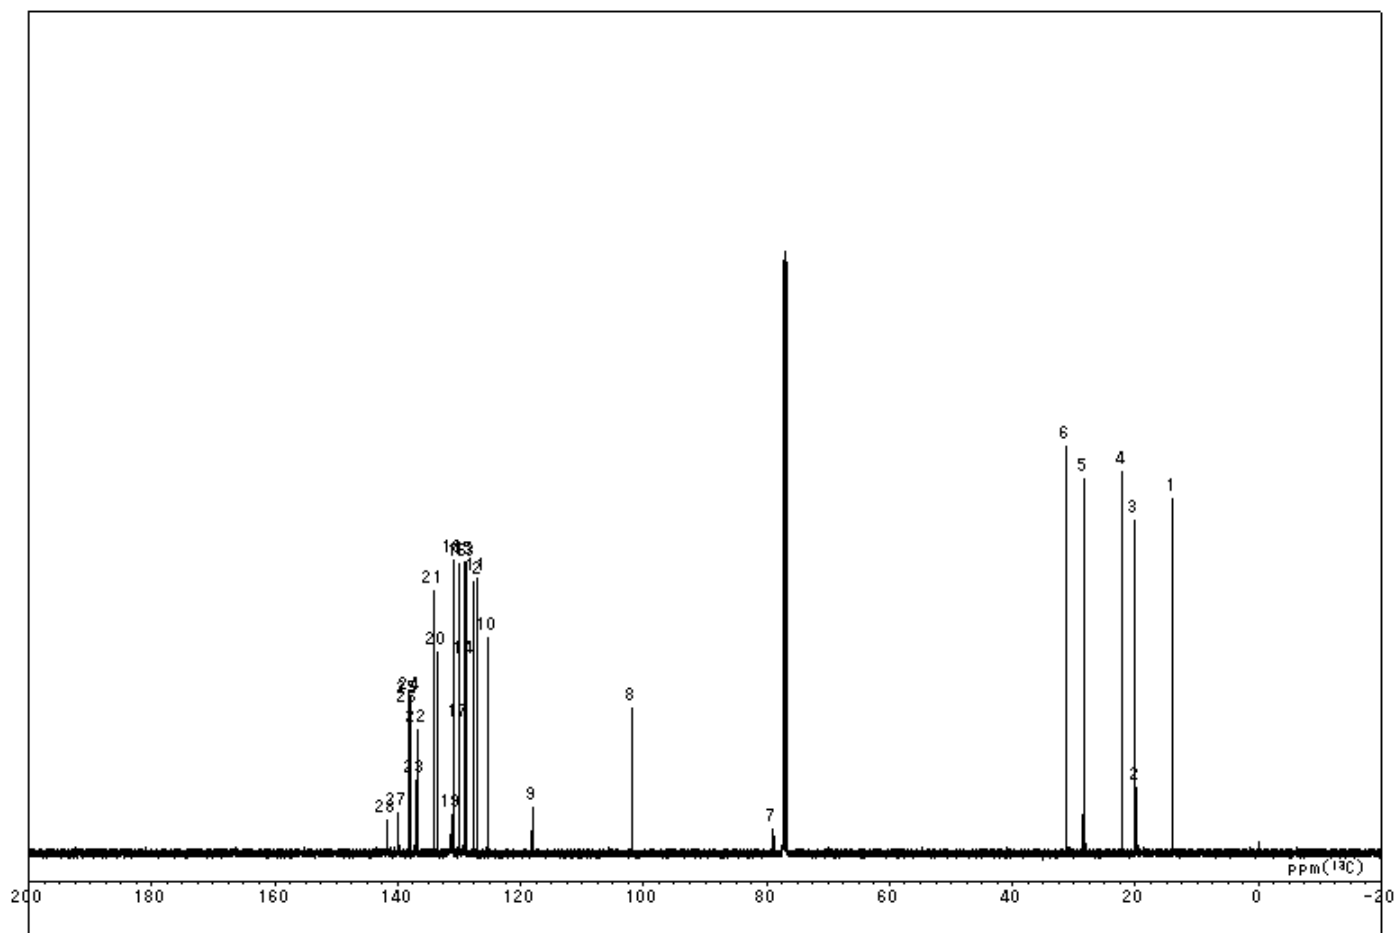

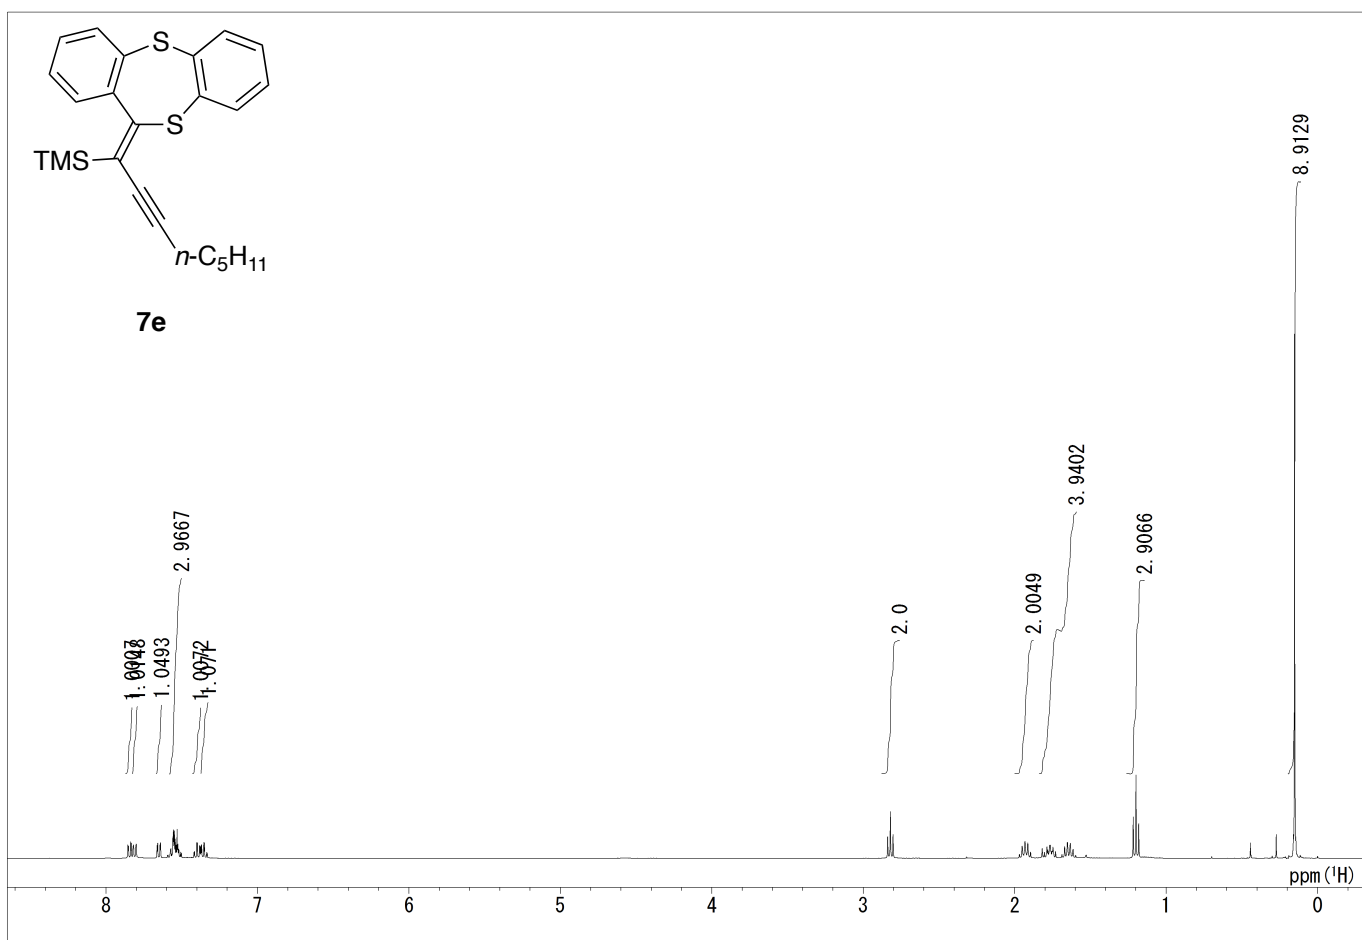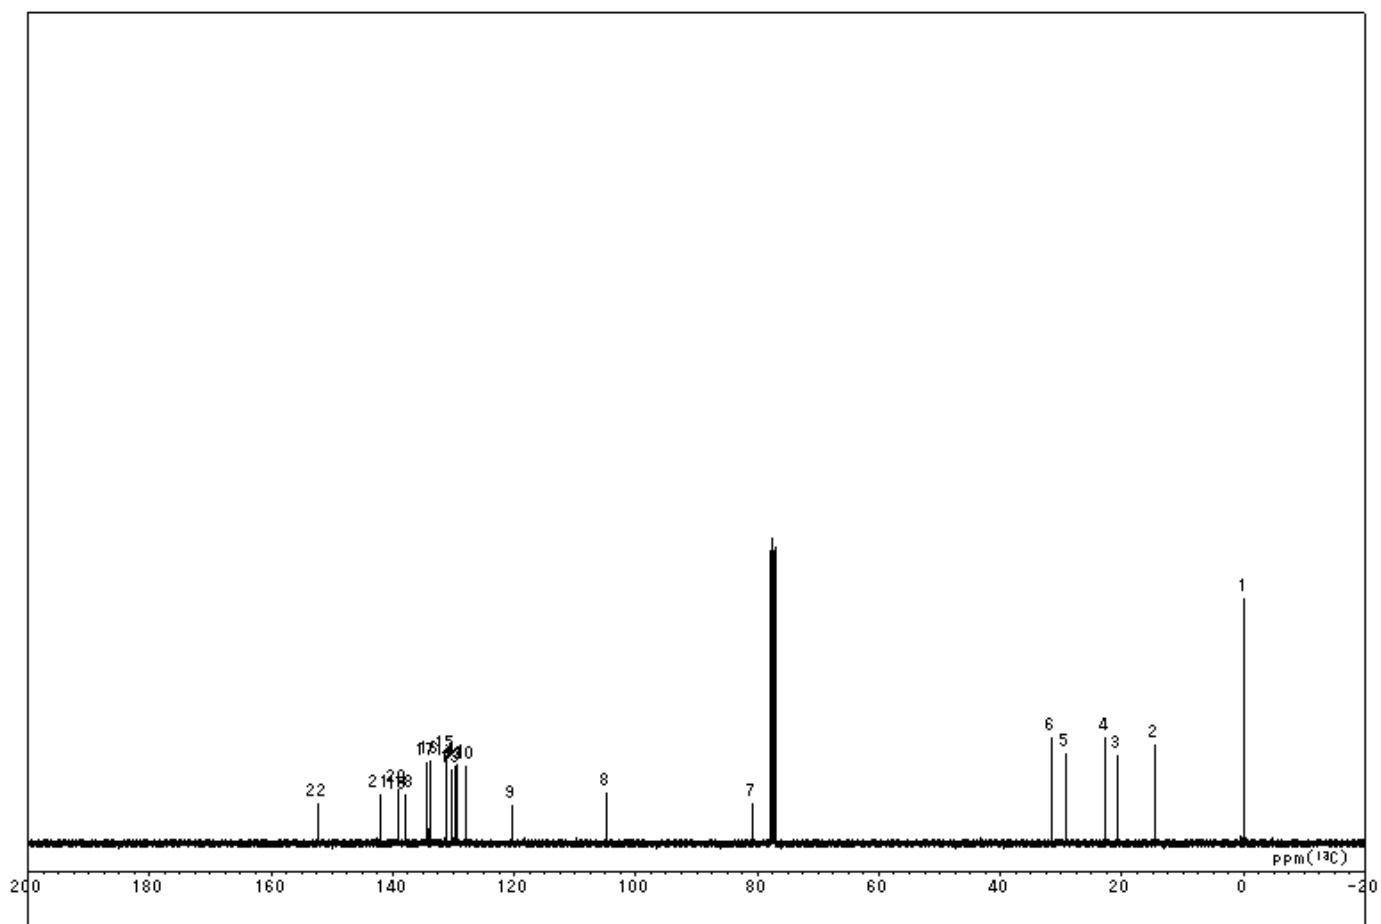

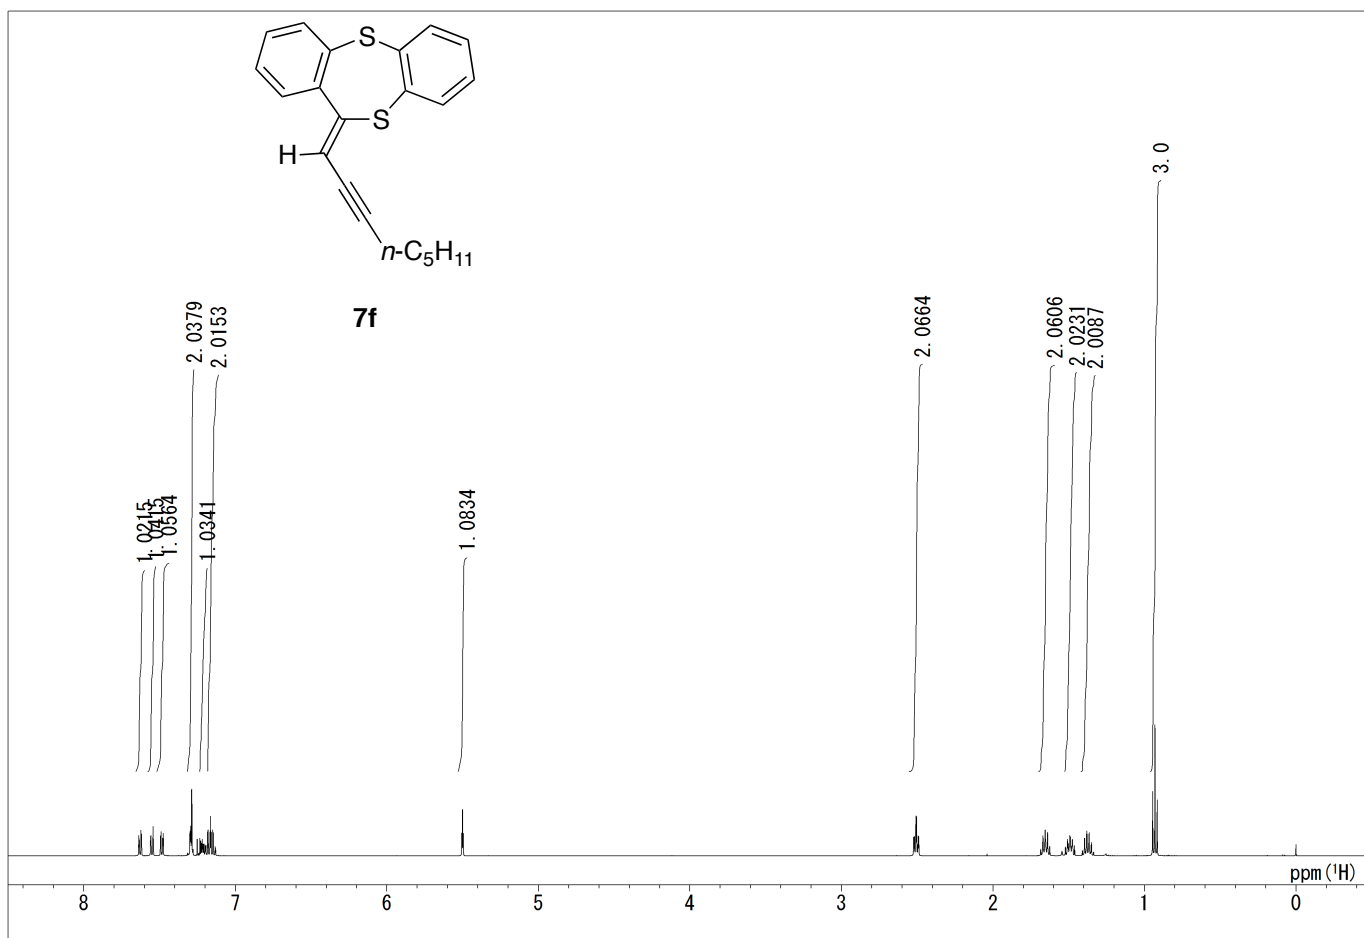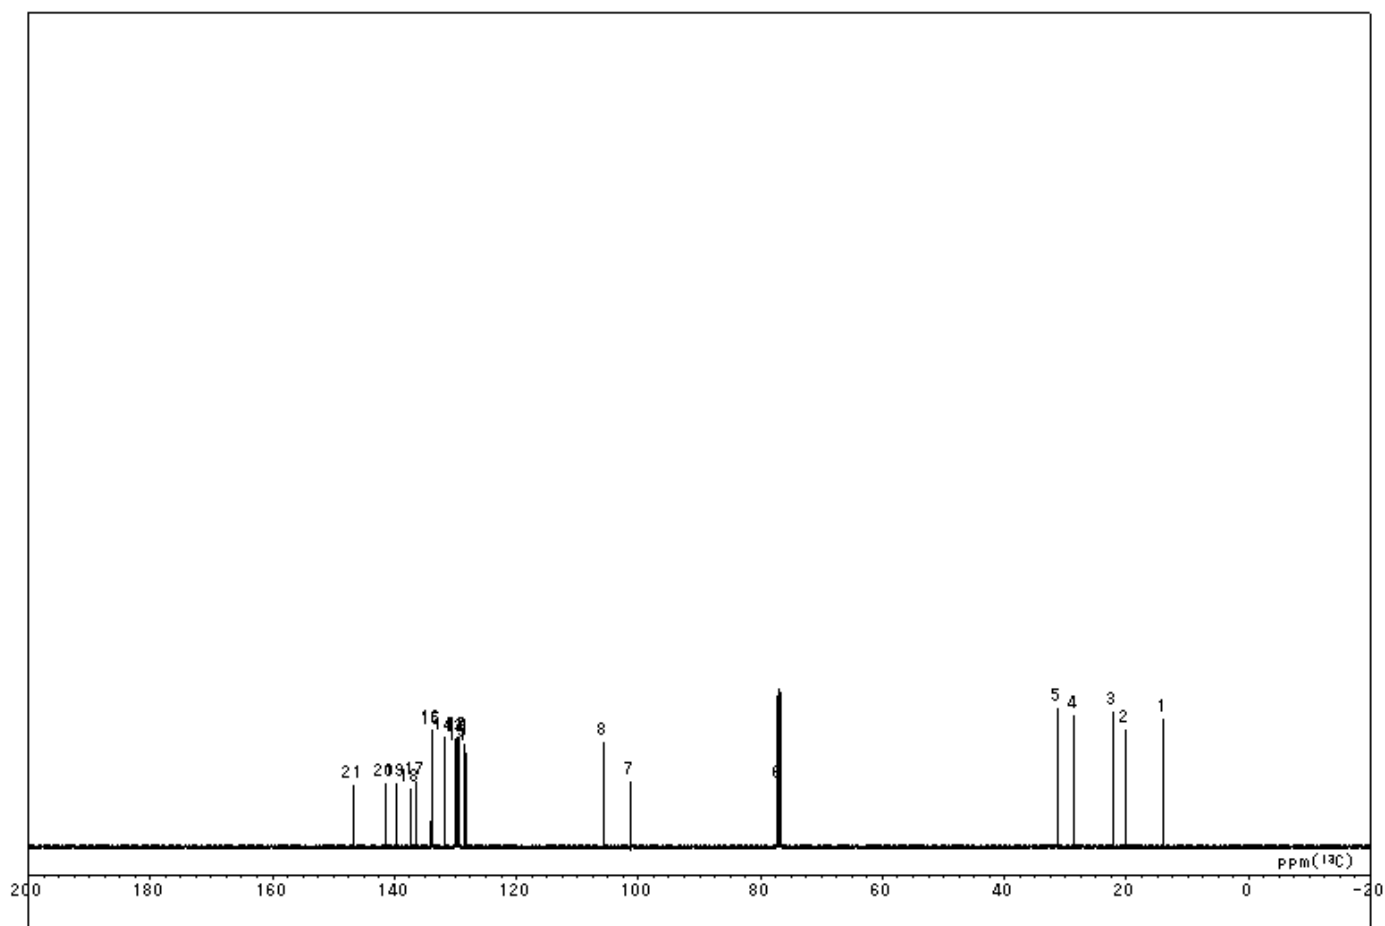

vi) Copies of  $^1\text{H}$  NMR and  $^{31}\text{P}$  NMR spectra for complex A

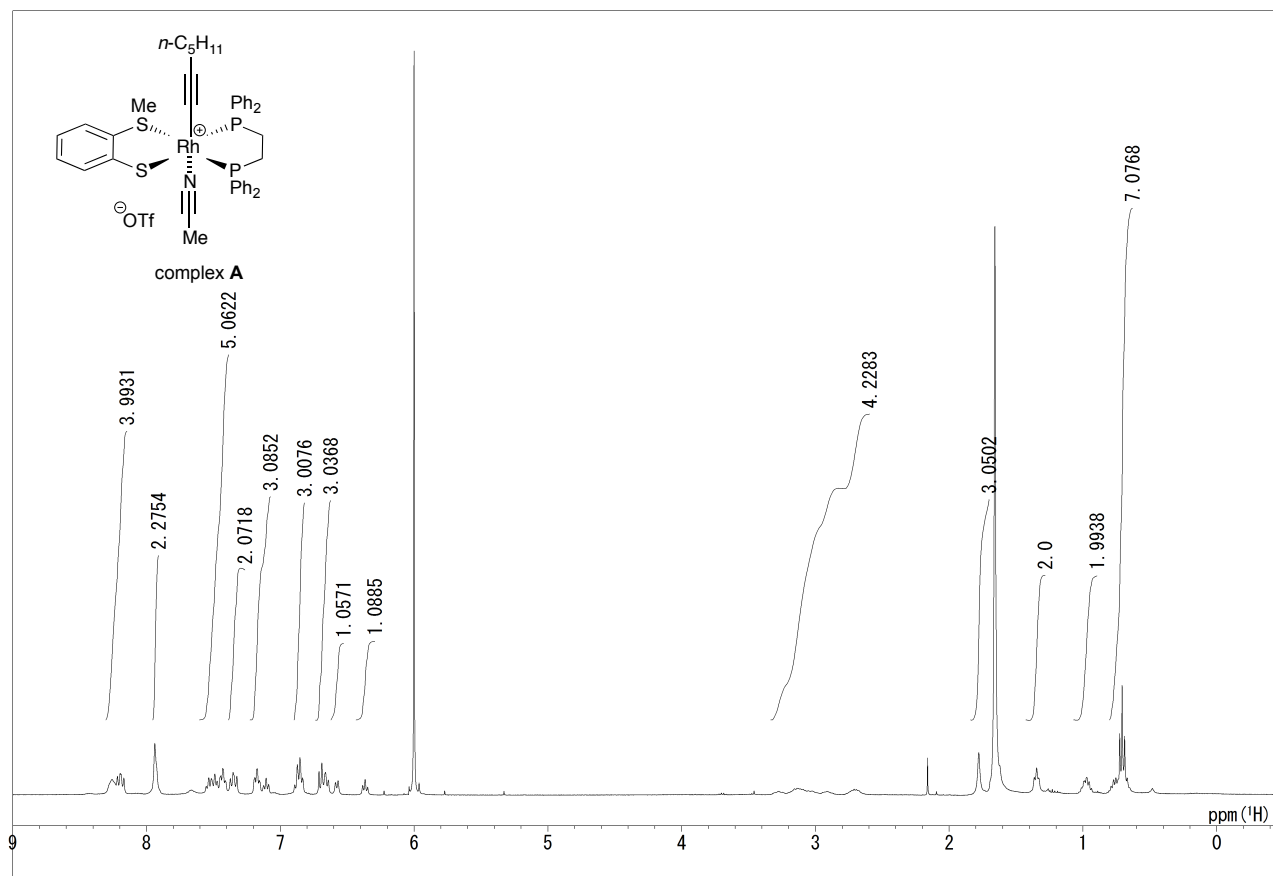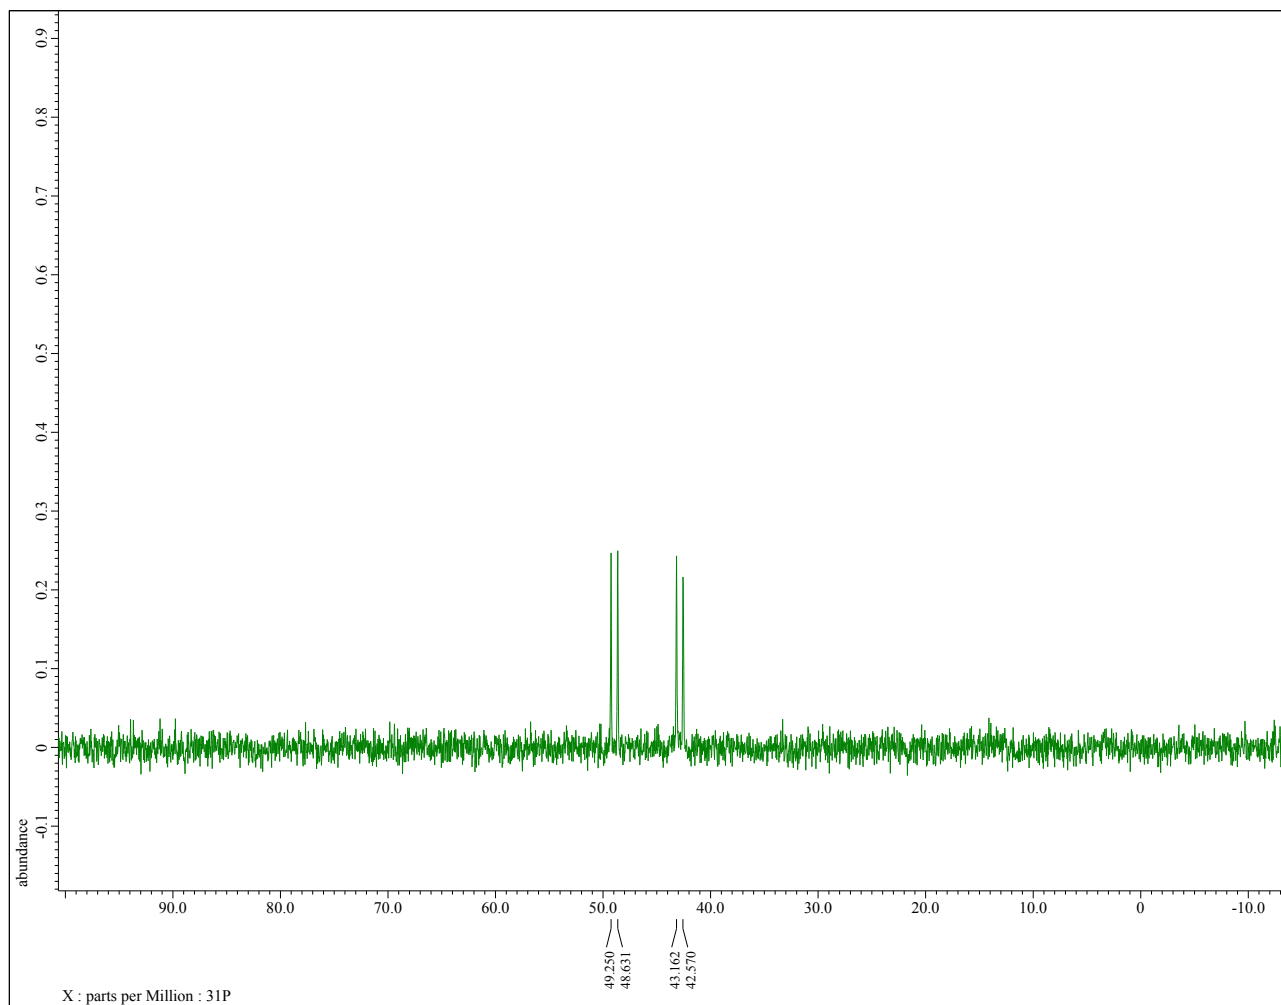

Supplement: c7cc04997h1.pdf [file c7cc04997h1.pdf]
